# Supplementary material for: Diverse C(sp 3 )–H functionalizations through electrochemical benzylic oxygenation
Source: Royal Society of Chemistry journal article supplement (doi:10.1039/d4qo02022g), 2025-01-01
Supplement: d4qo02022g1.pdf [file d4qo02022g1.pdf]

## Supplementary Information

### Diverse C(sp<sup>3</sup>)-H Functionalization Through Electrochemical Benzylic Oxygenation

Yan He,<sup>†1</sup> Tian-Sheng Chen,<sup>‡2</sup> Xuesen Fan<sup>1</sup> and Hai-Chao Xu<sup>\*2,3</sup>

<sup>1</sup>State key laboratory of Antiviral Drugs, School of Chemistry and Chemical Engineering, and School of Environment, Henan Normal University, Xinxiang 453007, China

<sup>2</sup>State Key Laboratory of Physical Chemistry of Solid Surfaces, Key Laboratory of Chemical Biology of Fujian Province, Discipline of Intelligent Instrument and Equipment, and College of Chemistry and Chemical Engineering, Xiamen University, Xiamen 361005, China

<sup>3</sup>Discipline of Intelligent Instrument and Equipment, Xiamen University, Xiamen 361005, China

<sup>†</sup>These authors contribute equally to this work.

\*Correspondence: haichao.xu@xmu.edu.cn

## Table of Contents

|                                                            |      |
|------------------------------------------------------------|------|
| 1. General Information .....                               | S3   |
| 2. Additional Optimization of Reaction Conditions .....    | S4   |
| 3. Detailed Steps for the Desaturation of Alkylarene ..... | S6   |
| 4. Characterization Data for the Alkene Products .....     | S8   |
| 5. Alkene Transformations .....                            | S20  |
| 6. Details for the Diverse Transformations .....           | S22  |
| 7. Synthesis and Characterization of New Substrates .....  | S27  |
| 8. Mechanistic Studies .....                               | S30  |
| 9. Limitations .....                                       | S38  |
| 10. References .....                                       | S39  |
| 11. NMR and GC Spectra .....                               | S40  |
| 12. X-ray Crystal Structures and Data of 42 and 42' .....  | S108 |

## 1. General Information

The commercially available reagents were used without purification. Flash column chromatography was performed with silica gel (200–300 mesh). NMR spectra were recorded on Bruker AV-400 instruments and Zhongke-Niujin Quantum-I<sup>plus</sup> spectrometer. Data were reported as chemical shifts in ppm relative to CDCl<sub>3</sub> (7.29 ppm) for <sup>1</sup>H and CDCl<sub>3</sub> (77.2 ppm) for <sup>13</sup>C. The abbreviations used for explaining the multiplicities were as follows: s = singlet, d = doublet, t = triplet, q = quartet, m = multiplet, dd = doublet of doublet, br s = broad singlet. Infrared spectra were recorded on a Nicolet AVATER FTIR 330 spectrometer. GC analyses were carried out on Agilent 8860 GC system (column type: HP-5MS 5% Phenyl Methyl Silox, 30 m × 250 μm × 0.25 μm; rate flow: 1.2 mL/min). High-resolution mass spectra (ESI or APCI) were recorded by the instrumentation center of Department of Chemistry, Xiamen University, on a Micromass QTOF2 Quadruple/Time-of-Flight Tandem mass spectrometer.

## 2. Additional Optimization of Reaction Conditions

**Table S1. Optimization of elimination conditions for the electron-rich substrate S-1.<sup>a</sup>**

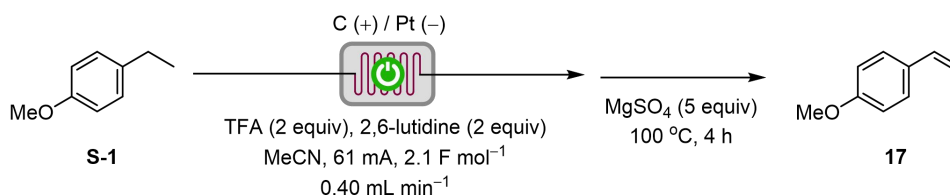

| Entry | Deviations                                    | Yield of <b>17</b> (%) <sup>b</sup> |
|-------|-----------------------------------------------|-------------------------------------|
| 1     | None                                          | 80                                  |
| 2     | In the absence of MgSO <sub>4</sub>           | 26                                  |
| 3     | MgSO <sub>4</sub> (2 equiv)                   | 74                                  |
| 4     | 70 °C instead of 100 °C                       | 62                                  |
| 5     | 1 h instead of 4 h                            | 48                                  |
| 6     | In the presence of HBF <sub>4</sub> (1 equiv) | 11                                  |

<sup>a</sup>Reaction conditions: **S-1** (0.045 M), 8.0 mL of the outlet solution was collected and analyzed. <sup>b</sup>Yield determined by <sup>1</sup>H NMR analysis using 1,3,5-trimethoxybenzene as the internal standard.

**Table S2. Optimization of elimination conditions for the reaction of S-2.<sup>a</sup>**

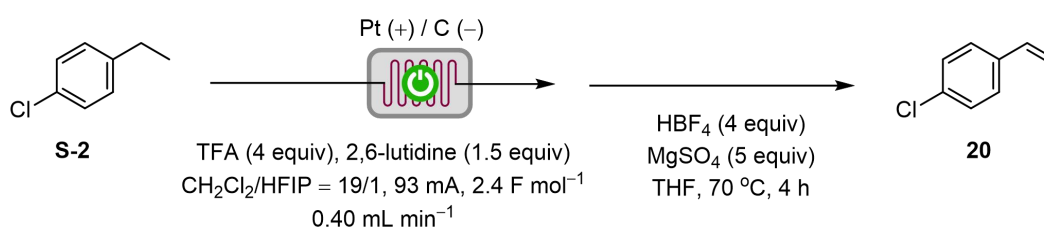

| Entry | Deviations                                  | Yield of <b>20</b> (%) <sup>b</sup> |
|-------|---------------------------------------------|-------------------------------------|
| 1     | None                                        | 67                                  |
| 2     | No MgSO <sub>4</sub>                        | 41                                  |
| 3     | 4Å MS (150 mg) instead of MgSO <sub>4</sub> | 53                                  |

<sup>a</sup>Reaction conditions: **S-2** (0.06 M), 6.0 mL of the outlet solution was collected and analyzed. <sup>b</sup>Yield determined by <sup>1</sup>H NMR analysis using 1,3,5-trimethoxybenzene as the internal standard.



**Table S3. Conditions for the formation of intermediate trifluoroacetic ester I-1 from substrate 1.<sup>a</sup>**

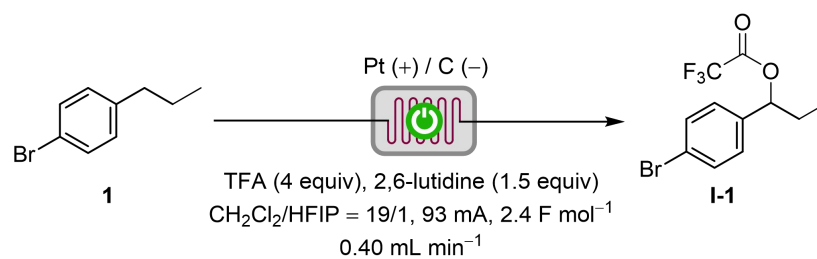

| Entry | Deviations                                                  | Conversion of <b>1</b> (%) | Yield of <b>I-1</b> (%) <sup>b</sup> |
|-------|-------------------------------------------------------------|----------------------------|--------------------------------------|
| 1     | None                                                        | 100                        | 93                                   |
| 2     | Reaction in batch (9.3 mA, 1.4 F mol <sup>-1</sup> , 1.5 h) | 71                         | 54                                   |
| 3     | Reaction in batch (9.3 mA, 2.4 F mol <sup>-1</sup> , 2.5 h) | 91                         | 64                                   |
| 4     | Reaction in batch (9.3 mA, 3.4 F mol <sup>-1</sup> , 3.5 h) | 98                         | 32                                   |
| 5     | Reaction in batch (30 mA, 2.4 F mol <sup>-1</sup> , 0.8 h)  | 94                         | 57                                   |

<sup>a</sup>Reaction conditions: **1** (0.06 M), 6.0 mL of the outlet solution was collected and analyzed, residence time= 22 seconds. <sup>b</sup>Yield determined by <sup>1</sup>H NMR analysis using 1,3,5-trimethoxybenzene as the internal standard.

### 3. Detailed Steps for the Desaturation of Alkylarene

**General procedure A.** The electrolysis was conducted using a flow electrolytic cell equipped with a Pt anode and a graphite cathode with the exposed surface area of 10 cm<sup>2</sup> and interelectrode distance of 150 μm (Figure S1). The solution containing substrate (0.06 M), TFA (4.0 equiv), 2,6-lutidine (1.5 equiv) in dry CH<sub>2</sub>Cl<sub>2</sub>/HFIP (19/1) was pushed using a syringe pump to pass through the flow cell operated with a flow rate of 0.40 mL min<sup>-1</sup> and a constant current in the range of 93–144 mA. 6 mL of the outlet solution was collected (15 min) and concentrated under reduced pressure. The residue was treated with THF (2.4 mL), HBF<sub>4</sub>·Et<sub>2</sub>O (4 equiv, 50% w/w) and MgSO<sub>4</sub> (0 or 5 equiv). Then, the mixture was warmed to 100 °C and stirred for 4 h. After being cooled to room temperature, the mixture was diluted with H<sub>2</sub>O and extracted twice with EtOAc. The combined organic phase was concentrated under reduced pressure. The residue was chromatographed through silica gel eluting with ethyl acetate/petroleum ether to give the alkene product.

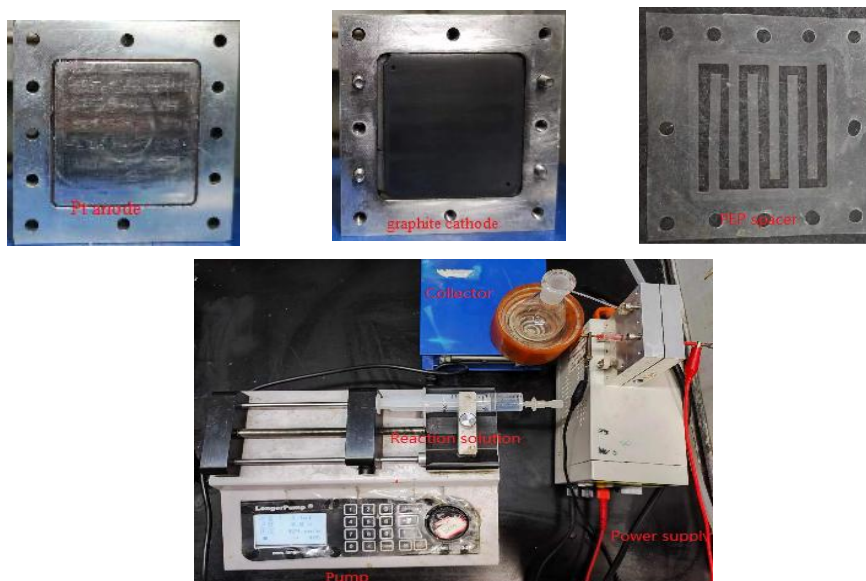

**Figure S1.** Assembling of the flow reactor and setup.

**General Procedure B.** The electrolysis was conducted using the same flow cell described above, but using graphite as anode and Pt as cathode. The solution containing substrate (0.045 M), TFA (2 equiv), 2,6-lutidine (2 equiv) in dry MeCN was pushed using a syringe pump to pass through the flow cell operated with a flow rate of 0.40 mL min<sup>-1</sup> and a constant current in the range of 61–100 mA. The outlet solution was collected for 20 min (8 mL), treated with MgSO<sub>4</sub> (5 equiv), warmed to 100 °C and

stirred for 4 h. After being cooled to room temperature, the mixture was concentrated under reduced pressure. The residue was chromatographed through silica gel eluting with ethyl acetate/petroleum ether to give the alkene product.

**Procedure for large scale synthesis of 38.** Methyl dehydroabietate (25.7 g, 82 mmol, 1.0 equiv), TFA (25.1 mL, 328 mmol, 4 equiv), 2,6-lutidine (14.3 mL, 123 mmol, 1.5 equiv) were dissolved in dry  $\text{CH}_2\text{Cl}_2/\text{HFIP}$  (19/1, 1.4 L). The resulting solution was pumped through 8 flow cells with a flow rate of  $0.4 \text{ mL min}^{-1}$  for each reactor (Figure S2). The constant current for each reactor was 114 mA, and the electricity consumption was  $2.9 \text{ F mol}^{-1}$ . Upon complete passing of the reaction solution in 8.5 h, the collected outlet solution was concentrated under reduced pressure. The residue was treated with THF (360 mL),  $\text{HBF}_4 \cdot \text{Et}_2\text{O}$  (66.9 mL, 3 equiv, 50% w/w) and  $\text{MgSO}_4$  (1.5 g, 1.5 equiv). Then, the mixture was warmed to  $100 \text{ }^\circ\text{C}$  and stirred for 6 h. After being cooled to room temperature, the mixture was diluted with  $\text{H}_2\text{O}$  and extracted twice with EtOAc. The combined organic phase was then washed with 0.6 M  $\text{H}_2\text{SO}_4$  to remove 2,6-lutidine and concentrated under reduced pressure. The residue was chromatographed through silica gel eluting with ethyl acetate/petroleum ether to give **38** (10.9 g, yield = 43%).

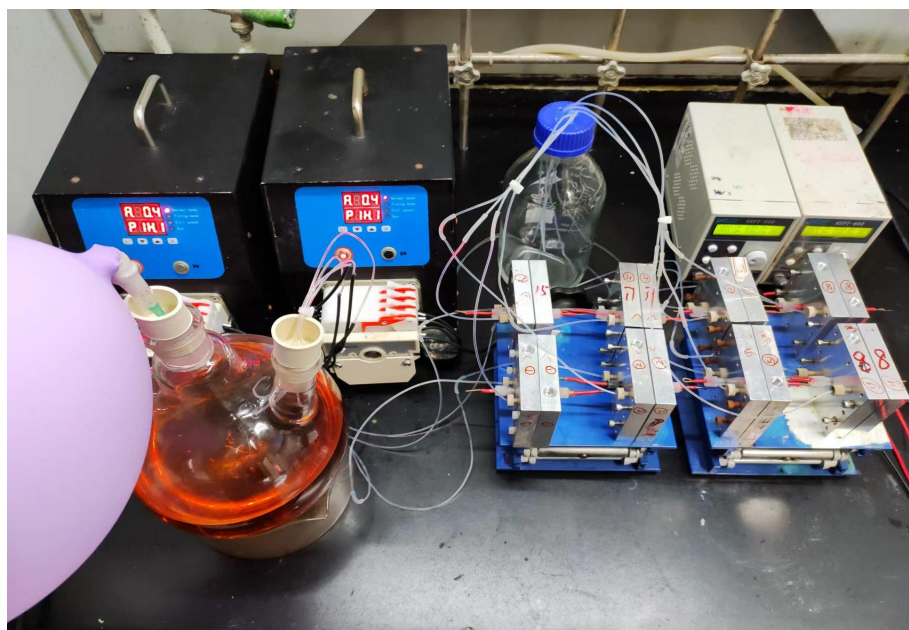

**Figure S2.** Reaction setup for scale-up with 8 parallel flow cells.

#### 4. Characterization Data for the Alkene Products

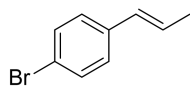

**(E)-1-Bromo-4-(prop-1-en-1-yl)benzene (2).** The title compound was obtained by following the **General Procedure A** but without the addition of  $\text{MgSO}_4$ . This compound known in the literature.<sup>1</sup> White solid, yield = 81% (57 mg,  $E/Z = 29/1$ , determined by GC analysis), current = 93 mA, electricity =  $2.4 \text{ F mol}^{-1}$ .  $^1\text{H NMR}$  (400 MHz,  $\text{CDCl}_3$ )  $\delta$  7.44 (d,  $J = 8.4 \text{ Hz}$ , 2H), 7.22 (d,  $J = 8.4 \text{ Hz}$ , 2H), 6.37 (d,  $J = 16.0 \text{ Hz}$ , 1H), 6.30–6.23 (m, 1H), 1.91 (dd,  $J_1 = 6.4 \text{ Hz}$ ,  $J_2 = 1.2 \text{ Hz}$ , 3H).  $^{13}\text{C NMR}$  (101 MHz,  $\text{CDCl}_3$ )  $\delta$  136.9, 131.5, 129.9, 127.4, 126.6, 120.3, 18.5.

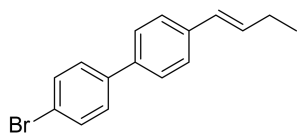

**(E)-4-Bromo-4'-(but-1-en-1-yl)-1,1'-biphenyl (3).** The title compound was obtained by following the **General Procedure A** but without the addition of  $\text{MgSO}_4$ . White solid, yield = 84% (86 mg,  $E/Z = 39/1$ , determined by GC analysis), current = 108 mA, electricity =  $2.8 \text{ F mol}^{-1}$ .  $^1\text{H NMR}$  (400 MHz,  $\text{CDCl}_3$ )  $\delta$  7.58–7.56 (m, 2H), 7.53–7.43 (m, 6H), 6.45 (d,  $J = 16.0 \text{ Hz}$ , 1H), 6.39–6.34 (m, 1H), 2.31–2.27 (m, 2H), 1.15 (t,  $J = 7.2 \text{ Hz}$ , 3H).  $^{13}\text{C NMR}$  (101 MHz,  $\text{CDCl}_3$ )  $\delta$  139.8, 138.2, 137.4, 133.2, 131.8, 128.4, 128.2, 127.0, 126.4, 121.3, 26.1, 13.6. IR (neat,  $\text{cm}^{-1}$ ): 3055, 2964, 1646, 1539, 1481, 1390, 1264, 969, 806, 738, 705. ESI HRMS  $m/z$  ( $\text{M}+\text{H}$ )<sup>+</sup> calcd 287.0430, obsd 287.0426.

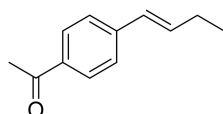

**(E)-1-(4-(But-1-en-1-yl)phenyl)ethanone (4).** The title compound was obtained through layer chromatography by following the **General Procedure A** but without the addition of  $\text{MgSO}_4$ . Colorless oil, yield = 44% (28 mg,  $E$  only, determined by GC analysis), current = 116 mA, electricity =  $3.0 \text{ F mol}^{-1}$ .  $^1\text{H NMR}$  (400 MHz,  $\text{CDCl}_3$ )  $\delta$  7.91 (d,  $J = 8.4 \text{ Hz}$ , 2H), 7.44 (d,  $J = 8.0 \text{ Hz}$ , 2H), 6.44 (m, 2H), 2.61 (s, 3H), 2.30–2.28 (m, 2H), 1.13 (t,  $J = 7.2 \text{ Hz}$ , 3H).  $^{13}\text{C NMR}$  (101 MHz,  $\text{CDCl}_3$ )  $\delta$  197.6, 142.7, 135.9, 135.4, 128.7, 128.0, 125.9, 26.5, 26.1, 13.3. IR (neat,  $\text{cm}^{-1}$ ): 2963, 2921, 2850, 1682, 1608, 1405, 1359, 1266, 959, 827. ESI HRMS  $m/z$  ( $\text{M}+\text{H}$ )<sup>+</sup> calcd 175.1117, obsd 175.1109.

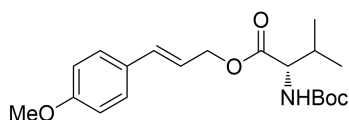

**(*S,E*)-3-(4-Methoxyphenyl)allyl 2-((*tert*-butoxycarbonyl)amino)-3-methylbutanoate (5).** The title compound was obtained by following the **General Procedure B**. White solid, yield = 72% (94 mg, *E/Z* = 47/1, determined by GC analysis), current = 61 mA, electricity = 2.1 F mol<sup>-1</sup>. <sup>1</sup>H NMR (400 MHz, CDCl<sub>3</sub>) δ 7.34 (d, *J* = 8.8 Hz, 2H), 6.88 (d, *J* = 8.4 Hz, 2H), 6.64 (d, *J* = 16.0 Hz, 1H), 6.17–6.13 (m, 1H), 5.08 (d, *J* = 7.6 Hz, 1H), 4.79 (d, *J* = 5.2 Hz, 2H), 4.28 (br s, 1H), 3.82 (s, 3H), 2.17 (m, 1H), 1.46 (s, 9H), 0.99 (d, *J* = 6.8 Hz, 3H), 0.92 (d, *J* = 6.8 Hz, 3H). <sup>13</sup>C NMR (101 MHz, CDCl<sub>3</sub>) δ 172.3, 159.7, 155.7, 134.5, 128.8, 127.9, 120.4, 114.1, 79.7, 65.9, 58.6, 55.2, 31.3, 28.3, 19.0, 17.5. IR (neat, cm<sup>-1</sup>): 3374, 2972, 2837, 1717, 1607, 1577, 1497, 1368, 1250, 1092, 1031, 971, 848, 804, 778. ESI HRMS *m/z* (M+Na)<sup>+</sup> calcd 386.1938, obsd 386.1947.

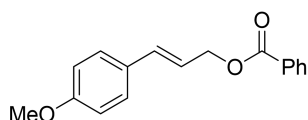

**(*E*)-3-(4-Methoxyphenyl)allyl benzoate (6).** The title compound was obtained by following the **General Procedure B**. This compound known in the literature.<sup>2</sup> Colorless oil, yield = 74% (71 mg, *E/Z* > 49/1, determined by GC analysis), current = 61 mA, electricity = 2.1 F mol<sup>-1</sup>. <sup>1</sup>H NMR (400 MHz, CDCl<sub>3</sub>) δ 8.14 (d, *J* = 8.4 Hz, 2H), 7.69–7.56 (m, 1H), 7.53–7.44 (m, 2H), 7.41 (d, *J* = 8.4 Hz, 2H), 6.91 (d, *J* = 8.4 Hz, 2H), 6.74 (d, *J* = 16.0 Hz, 1H), 6.36–6.29 (m, 1H), 5.01 (d, *J* = 6.4 Hz, 2H), 3.84 (s, 3H). <sup>13</sup>C NMR (101 MHz, CDCl<sub>3</sub>) δ 166.5, 159.6, 134.1, 133.0, 130.3, 129.7, 129.0, 128.4, 127.9, 121.0, 114.1, 65.8, 55.3.

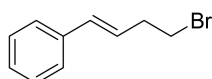

**(*E*)-(4-Bromobut-1-en-1-yl)benzene (7).** The title compound was obtained by following the **General Procedure A**. This compound known in the literature.<sup>3</sup> Colorless oil, yield = 74% (56 mg, *E* only, determined by GC analysis), current = 93 mA, electricity = 2.4 F mol<sup>-1</sup>. <sup>1</sup>H NMR (400 MHz, CDCl<sub>3</sub>) δ 7.41–7.32 (m, 4H), 7.29–7.24 (m, 1H), 6.52 (d, *J* = 15.6 Hz, 1H), 6.25–6.18 (m, 1H), 3.51 (t, *J* = 7.2 Hz, 2H), 2.84–2.78 (m, 2H). <sup>13</sup>C NMR (101 MHz, CDCl<sub>3</sub>) δ 137.0, 132.7, 128.5, 127.4, 126.6, 126.2, 36.3, 32.2.

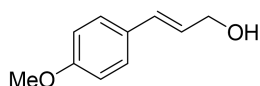

**(*E*)-3-(4-Methoxyphenyl)prop-2-en-1-ol (8).** The title compound was obtained by

following the **General Procedure B**. This compound known in the literature.<sup>4</sup> Colorless oil, yield = 61% (36 mg, *E* only, determined by GC analysis), current = 61 mA, electricity = 2.1 F mol<sup>-1</sup>. <sup>1</sup>H NMR (400 MHz, CDCl<sub>3</sub>) δ 7.35 (d, *J* = 7.2 Hz, 2H), 6.88 (d, *J* = 7.2 Hz, 2H), 6.58 (d, *J* = 16.0 Hz, 1H), 6.29–6.22 (m, 1H), 4.32 (dd, *J*<sub>1</sub> = 6.4 Hz, *J*<sub>2</sub> = 1.2 Hz, 2H), 3.83 (s, 3H). <sup>13</sup>C NMR (101 MHz, CDCl<sub>3</sub>) δ 159.3, 131.0, 129.4, 127.7, 126.2, 114.0, 63.9, 55.3.

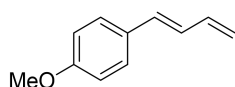

**(E)-1-(Buta-1,3-dien-1-yl)-4-methoxybenzene (9)**. The title compound was obtained by following the **General Procedure B**. This compound known in the literature.<sup>5</sup> Colorless oil, yield = 70% (41 mg, *E* only, determined by GC analysis), current = 61 mA, electricity = 2.1 F mol<sup>-1</sup>. <sup>1</sup>H NMR (400 MHz, CDCl<sub>3</sub>) δ 7.38 (d, *J* = 8.4 Hz, 2H), 6.90 (d, *J* = 8.8 Hz, 2H), 6.74–6.68 (m, 1H), 6.57–6.48 (m, 2H), 5.32 (d, *J* = 16.0, 1H), 5.17–5.14 (m, 1H), 3.85 (s, 3H). <sup>13</sup>C NMR (101 MHz, CDCl<sub>3</sub>) δ 159.3, 137.4, 132.4, 129.9, 127.6, 116.4, 114.1, 55.3.

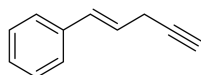

**(E)-Pent-1-en-4-yn-1-ylbenzene (10)**. The title compound was obtained by following the **General Procedure A**. This compound known in the literature.<sup>6</sup> Colorless oil, yield = 50% (26 mg, *E* only, determined by GC analysis), current = 93 mA, electricity = 2.4 F mol<sup>-1</sup>. <sup>1</sup>H NMR (400 MHz, CDCl<sub>3</sub>) δ 7.40 (d, *J* = 7.6 Hz, 2H), 7.38–7.30 (m, 2H), 7.29–7.23 (m, 1H), 6.70 (d, *J* = 16.0 Hz, 1H), 6.24–6.17 (m, 1H), 3.18 (d, *J* = 2.0, 2H), 2.21 (s, 1H). <sup>13</sup>C NMR (101 MHz, CDCl<sub>3</sub>) δ 137.0, 131.6, 128.5, 127.4, 126.2, 123.6, 81.2, 70.6, 21.9.

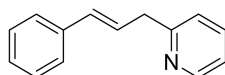

**2-Cinnamylpyridine (11)**. The title compound was obtained by following the **General Procedure A**, the corresponding reaction mixture was diluted with saturated aqueous NaHCO<sub>3</sub> instead of H<sub>2</sub>O. This compound known in the literature.<sup>7</sup> White solid, yield = 49% (34 mg, *E* only, determined by GC analysis), current = 93 mA, electricity = 2.4 F mol<sup>-1</sup>. <sup>1</sup>H NMR (400 MHz, CDCl<sub>3</sub>) δ 8.58 (d, *J* = 4.8 Hz, 1H), 7.67–7.63 (m, 1H), 7.41–7.15 (m, 7H), 6.59–6.44 (m, 2H), 3.77 (d, *J* = 6.8 Hz, 2H). <sup>13</sup>C NMR (101 MHz, CDCl<sub>3</sub>) δ 160.2, 149.3, 137.3, 136.7, 132.0, 128.5, 127.4, 127.2, 126.2, 122.9, 121.4, 42.0.

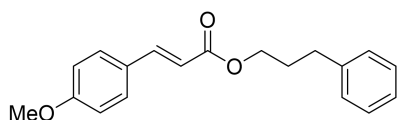

**(E)-3-Phenylpropyl 3-(4-methoxyphenyl)acrylate (12).** The title compound was obtained through layer chromatography by following the **General Procedure B**. Colorless oil, yield = 52% (55 mg, *E* only, determined by GC analysis), current = 61 mA, electricity = 2.1 F mol<sup>-1</sup>. <sup>1</sup>H NMR (400 MHz, CDCl<sub>3</sub>) δ 7.68 (d, *J* = 16.4 Hz, 1H), 7.52 (d, *J* = 8.4 Hz, 2H), 7.35-7.31 (m, 2H), 7.26-7.23 (m, 3H), 6.94 (d, *J* = 8.8 Hz, 2H), 6.36 (d, *J* = 16.0 Hz, 1H), 4.26 (t, *J* = 6.8 Hz, 2H), 3.87 (s, 3H), 2.78 (t, *J* = 7.6 Hz, 2H), 2.09-2.05 (m, 2H). <sup>13</sup>C NMR (101 MHz, CDCl<sub>3</sub>) δ 167.4, 161.4, 144.4, 141.3, 129.7, 128.5, 127.2, 126.0, 115.6, 114.3, 63.7, 55.4, 32.3, 30.4. IR (neat, cm<sup>-1</sup>): 3027, 2953, 2838, 1709, 1634, 1604, 1575, 1513, 1497, 1454, 1422, 1380, 1302, 1254, 1159, 1111, 1030, 982, 828, 751, 698. ESI HRMS *m/z* (M+Na)<sup>+</sup> calcd 319.1305, obsd 319.1311.

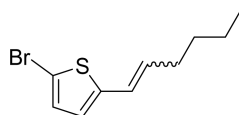

**2-Bromo-5-(hex-1-en-1-yl)thiophene (13).** The title compound was obtained by following the **General Procedure B**. Colorless oil, yield = 56% (49 mg, *E/Z* = 5/1, determined by <sup>1</sup>H NMR), current = 81 mA, electricity = 2.8 F mol<sup>-1</sup>. <sup>1</sup>H NMR (400 MHz, CDCl<sub>3</sub>) δ 6.97 (d, *J* = 4.0 Hz, 0.15H), 6.90 (d, *J* = 4.0 Hz, 0.85H), 6.72 (d, *J* = 3.6 Hz, 0.15H), 6.61 (d, *J* = 3.6 Hz, 0.85H), 6.44-6.39 (m, 1H), 6.03-5.95 (m, 0.85H), 5.63-5.58 (m, 0.15H), 2.38-2.33 (m, 0.30H), 2.20-2.15 (m, 1.70H), 1.51-1.33 (m, 4H), 0.98-0.92 (m, 3H). <sup>13</sup>C NMR (101 MHz, CDCl<sub>3</sub>) δ 144.9, 131.9, 130.0, 129.4, 127.0, 124.2, 122.6, 121.4, 109.5, 32.5, 31.5, 31.2, 29.1, 22.4, 22.2, 13.9. IR (neat, cm<sup>-1</sup>): 3098, 2957, 2929, 2871, 1713, 1674, 1531, 1507, 1416, 1327, 1247, 1085, 1048, 976, 805, 749. ESI HRMS *m/z* (M+H)<sup>+</sup> calcd 244.9994, obsd 244.9996.

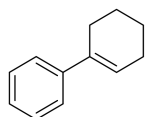

**2,3,4,5-Tetrahydro-1,1'-biphenyl (14).** The title compound was obtained through layer chromatography by following the **General Procedure A**. This compound known in the literature.<sup>8</sup> Colorless oil, yield = 54% (31 mg), current = 93 mA, electricity = 2.4 F mol<sup>-1</sup>. <sup>1</sup>H NMR (400 MHz, CDCl<sub>3</sub>) δ 7.44 (d, *J* = 7.6 Hz, 2H), 7.38-7.31 (m, 2H), 7.28-7.22 (m, 1H), 6.21-6.13 (m, 1H), 2.48 (t, *J* = 7.6 Hz, 2H), 2.29-2.27 (m, 2H), 1.87-1.76 (m, 2H), 1.76-1.71 (m, 2H). <sup>13</sup>C NMR (101 MHz, CDCl<sub>3</sub>) δ 142.7, 136.6, 128.2, 126.5, 124.9, 124.8, 27.4, 25.9, 23.1, 22.2.

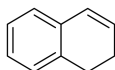

**1,2-Dihydronaphthalene (15).** The title compound was obtained by following the **General Procedure A**. This compound known in the literature.<sup>9</sup> Colorless oil, yield = 66% (31 mg), current = 93 mA, electricity = 2.4 F mol<sup>-1</sup>. <sup>1</sup>H NMR (400 MHz, CDCl<sub>3</sub>) δ 7.21–7.06 (m, 4H), 6.54–6.46 (m, 1H), 6.11–6.06 (m, 1H), 2.85 (t, *J* = 8.0 Hz, 2H), 2.40–2.34 (m, 2H). <sup>13</sup>C NMR (101 MHz, CDCl<sub>3</sub>) δ 135.4, 134.1, 128.6, 127.8, 127.5, 126.8, 126.4, 125.9, 27.5, 23.1.

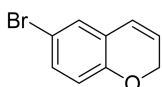

**6-Bromo-2H-chromene (16).** The title compound was obtained by following the **General Procedure B**. This compound known in the literature.<sup>10</sup> White solid, yield = 41% (31 mg), current = 78 mA, electricity = 2.7 F mol<sup>-1</sup>. <sup>1</sup>H NMR (400 MHz, CDCl<sub>3</sub>) δ 7.23–7.18 (m, 1H), 7.08 (d, *J* = 2.4 Hz, 1H), 6.66 (d, *J* = 7.6 Hz, 1H), 6.38–6.35 (m, 1H), 5.84–5.80 (m, 1H), 4.85–4.84 (m, 2H). <sup>13</sup>C NMR (101 MHz, CDCl<sub>3</sub>) δ 153.1, 131.6, 129.0, 124.1, 123.5, 123.1, 117.4, 113.2, 65.6.

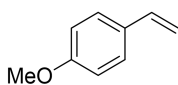

**1-Methoxy-4-vinylbenzene (17).** The title compound was obtained by following the **General Procedure B**. This compound known in the literature.<sup>11</sup> Colorless oil, yield = 79% (38 mg), current = 61 mA, electricity = 2.1 F mol<sup>-1</sup>. <sup>1</sup>H NMR (400 MHz, CDCl<sub>3</sub>) δ 7.42–7.34 (m, 2H), 6.93–6.86 (m, 2H), 6.70 (dd, *J*<sub>1</sub> = 17.6 Hz, *J*<sub>2</sub> = 10.8 Hz, 1H), 5.64 (d, *J* = 17.6 Hz, 1H), 5.16 (d, *J* = 10.8 Hz, 1H), 3.84 (s, 3H). <sup>13</sup>C NMR (101 MHz, CDCl<sub>3</sub>) δ 159.4, 136.2, 130.5, 127.4, 113.9, 111.5, 55.2.

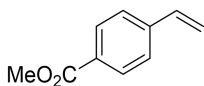

**Methyl 4-vinylbenzoate (18).** The title compound was obtained by following the **General Procedure A**. This compound known in the literature.<sup>12</sup> Colorless oil, yield = 64% (37 mg), current = 116 mA, electricity = 3.0 F mol<sup>-1</sup>. <sup>1</sup>H NMR (400 MHz, CDCl<sub>3</sub>) δ 8.06–7.98 (m, 2H), 7.48 (d, *J* = 8.4 Hz, 2H), 6.77 (dd, *J*<sub>1</sub> = 17.6 Hz, *J*<sub>2</sub> = 11.2 Hz, 1H), 5.88 (d, *J* = 17.6 Hz, 1H), 5.40 (d, *J* = 11.2 Hz, 1H), 3.93 (s, 3H). <sup>13</sup>C NMR (101 MHz, CDCl<sub>3</sub>) δ 166.9, 141.9, 136.0, 129.9, 129.7, 126.1, 116.5, 52.0.

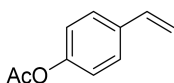



**4-Vinylphenyl acetate (19).** The title compound was obtained through layer chromatography by following the **General Procedure A**, with the modification of using THF (6 mL) instead of THF (2.4 mL). This compound known in the literature.<sup>13</sup> Colorless oil, yield = 59% (34 mg), current = 116 mA, electricity = 3.0 F mol<sup>-1</sup>. <sup>1</sup>H NMR (400 MHz, CDCl<sub>3</sub>) δ 7.43 (d, *J* = 8.4 Hz, 2H), 7.07 (d, *J* = 8.8 Hz, 2H), 6.72 (dd, *J*<sub>1</sub> = 17.6 Hz, *J*<sub>2</sub> = 10.8 Hz, 1H), 5.73 (d, *J* = 17.6 Hz, 1H), 5.27 (d, *J* = 10.8 Hz, 1H), 2.32 (s, 3H). <sup>13</sup>C NMR (101 MHz, CDCl<sub>3</sub>) δ 169.4, 150.2, 135.9, 128.7, 127.2, 121.6, 114.0, 21.1.

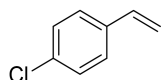

**1-Chloro-4-vinylbenzene (20).** The title compound was obtained through layer chromatography by following the **General Procedure A**, with the modification of using THF (6 mL) at 70 °C instead of THF (2.4 mL) at 100 °C. This compound known in the literature.<sup>14</sup> Colorless oil, yield = 64% (32 mg), current = 93 mA, electricity = 2.4 F mol<sup>-1</sup>. <sup>1</sup>H NMR (400 MHz, CDCl<sub>3</sub>) δ 7.37–7.30 (m, 4H), 6.69 (dd, *J*<sub>1</sub> = 17.6 Hz, *J*<sub>2</sub> = 10.8 Hz, 1H), 5.75 (d, *J* = 17.6 Hz, 1H), 5.29 (d, *J* = 10.8 Hz, 1H). <sup>13</sup>C NMR (101 MHz, CDCl<sub>3</sub>) δ 136.0, 135.7, 133.4, 128.7, 127.4, 114.4.

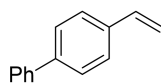

**4-Vinyl-1,1'-biphenyl (21).** The title compound was obtained by following the **General Procedure A**, with the modification of using THF (6 mL) instead of THF (2.4 mL). This compound known in the literature.<sup>11</sup> Colorless oil, yield = 67% (43 mg), current = 108 mA, electricity = 2.8 F mol<sup>-1</sup>. <sup>1</sup>H NMR (400 MHz, CDCl<sub>3</sub>) δ 7.65–7.60 (m, 4H), 7.53–7.46 (m, 4H), 7.40–7.38 (m, 1H), 6.80 (dd, *J*<sub>1</sub> = 17.6 Hz, *J*<sub>2</sub> = 10.8 Hz, 1H), 5.84 (dd, *J*<sub>1</sub> = 17.6 Hz, *J*<sub>2</sub> = 0.4 Hz, 1H), 5.32 (dd, *J*<sub>1</sub> = 10.8 Hz, *J*<sub>2</sub> = 0.4 Hz, 1H). <sup>13</sup>C NMR (101 MHz, CDCl<sub>3</sub>) δ 140.7, 140.6, 136.6, 136.4, 128.8, 127.3, 127.2, 127.0, 126.7, 113.9.

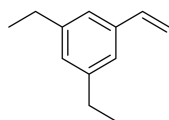

**1,3-Diethyl-5-vinylbenzene (22).** The title compound was obtained by following the **General Procedure A**, with the modification of using THF (6 mL) instead of THF (2.4 mL). This compound known in the literature.<sup>15</sup> Colorless oil, yield = 54% (31 mg), current = 100 mA, electricity = 2.6 F mol<sup>-1</sup>. <sup>1</sup>H NMR (400 MHz, CDCl<sub>3</sub>) δ 7.12 (s, 2H), 6.99 (s, 1H), 6.74 (dd, *J*<sub>1</sub> = 17.6 Hz, *J*<sub>2</sub> = 11.2 Hz, 1H), 5.78 (dd, *J*<sub>1</sub> = 17.6 Hz, *J*<sub>2</sub> = 0.4 Hz, 1H), 5.26 (dd, *J*<sub>1</sub> = 10.8 Hz, *J*<sub>2</sub> = 0.8 Hz, 1H), 2.67 (q, *J* = 7.6 Hz, 4H), 1.29 (t, *J* =

6.8 Hz, 6H).  $^{13}\text{C}$  NMR (101 MHz,  $\text{CDCl}_3$ )  $\delta$  144.5, 137.2, 127.2, 124.8, 123.2, 113.3, 28.8, 15.6.

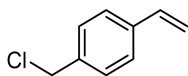

**1-(Chloromethyl)-4-vinylbenzene (23).** The title compound was obtained through layer chromatography by following the **General Procedure A**, with the modification of using THF (6 mL) instead of THF (2.4 mL). This compound known in the literature.<sup>16</sup> Colorless oil, yield = 46% (25 mg), current = 93 mA, electricity = 2.4 F mol<sup>-1</sup>.  $^1\text{H}$  NMR (400 MHz,  $\text{CDCl}_3$ )  $\delta$  7.42 (d,  $J$  = 8.4 Hz, 2H), 7.37 (d,  $J$  = 8.0 Hz, 2H), 6.74 (dd,  $J_1$  = 17.6 Hz,  $J_2$  = 10.8 Hz, 1H), 5.79 (d,  $J$  = 17.6 Hz, 1H), 5.30 (d,  $J$  = 10.8 Hz, 1H), 4.60 (s, 2H).  $^{13}\text{C}$  NMR (101 MHz,  $\text{CDCl}_3$ )  $\delta$  137.8, 136.9, 136.2, 128.8, 126.5, 114.5, 46.0.

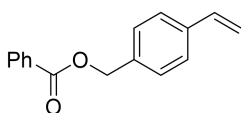

**4-Vinylbenzyl benzoate (24).** The title compound was obtained by following the **General Procedure A**, with the modification of using THF (6 mL) instead of THF (2.4 mL). Colorless oil, yield = 54% (46 mg), current = 93 mA, electricity = 2.4 F mol<sup>-1</sup>.  $^1\text{H}$  NMR (400 MHz,  $\text{CDCl}_3$ )  $\delta$  8.11 (d,  $J$  = 7.6 Hz, 2H), 7.63-7.55 (m, 1H), 7.48-7.43 (m, 6H), 6.76 (dd,  $J_1$  = 17.6 Hz,  $J_2$  = 11.2 Hz, 1H), 5.80 (d,  $J$  = 17.6 Hz, 1H), 5.38 (s, 2H), 5.29 (d,  $J$  = 11.2 Hz, 1H).  $^{13}\text{C}$  NMR (101 MHz,  $\text{CDCl}_3$ )  $\delta$  166.4, 137.6, 136.4, 135.5, 133.0, 130.1, 129.7, 128.5, 128.4, 126.4, 114.3, 66.4. IR (neat,  $\text{cm}^{-1}$ ): 3062, 3006, 2924, 2852, 1721, 1601, 1514, 1450, 1374, 1314, 1268, 1175, 1107, 1026, 989, 908, 830, 709. ESI HRMS  $m/z$  ( $\text{M}+\text{Na}$ )<sup>+</sup> calcd 261.0886, obsd 261.0894.

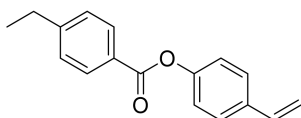

**4-Vinylphenyl 4-ethylbenzoate (25).** The title compound was obtained by following the **General Procedure A**, with the modification of using THF (6 mL) instead of THF (2.4 mL). This compound known in the literature.<sup>11</sup> Colorless oil, yield = 42% (38 mg), current = 93 mA, electricity = 2.4 F mol<sup>-1</sup>.  $^1\text{H}$  NMR (400 MHz,  $\text{CDCl}_3$ )  $\delta$  8.15 (d,  $J$  = 8.0 Hz, 2H), 7.50 (d,  $J$  = 8.4 Hz, 2H), 7.37 (d,  $J$  = 8.0 Hz, 2H), 7.21 (d,  $J$  = 8.8 Hz, 2H), 6.77 (dd,  $J_1$  = 17.6 Hz,  $J_2$  = 10.8 Hz, 1H), 5.77 (d,  $J$  = 17.6 Hz, 1H), 5.30 (d,  $J$  = 10.8 Hz, 1H), 2.78 (q,  $J$  = 7.2 Hz, 2H), 1.33 (t,  $J$  = 7.6 Hz, 3H).  $^{13}\text{C}$  NMR (101 MHz,  $\text{CDCl}_3$ )  $\delta$  165.2, 150.6, 136.0, 135.3, 130.3, 128.8, 128.1, 127.2, 121.8, 121.4, 113.9, 29.0, 15.2.

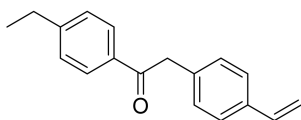

**1-(4-Ethylphenyl)-2-(4-vinylphenyl)ethan-1-one (26).** The title compound was obtained by following the **General Procedure A**, with the modification of using THF (6 mL) instead of THF (2.4 mL). White solid, yield = 42% (38 mg), current = 128 mA, electricity = 3.3 F mol<sup>-1</sup>. <sup>1</sup>H NMR (400 MHz, CDCl<sub>3</sub>) δ 7.97 (d, *J* = 8.0 Hz, 2H), 7.40 (d, *J* = 8.0 Hz, 2H), 7.32-7.26 (m, 4H), 6.73 (dd, *J*<sub>1</sub> = 17.6 Hz, *J*<sub>2</sub> = 10.8 Hz, 1H), 5.75 (d, *J* = 17.6 Hz, 1H), 5.25 (d, *J* = 10.8 Hz, 1H), 4.29 (s, 2H), 2.73 (q, *J* = 8.0 Hz, 2H), 1.29 (t, *J* = 7.6 Hz, 3H). <sup>13</sup>C NMR (101 MHz, CDCl<sub>3</sub>) δ 197.2, 150.1, 136.5, 136.2, 134.4, 134.3, 129.6, 128.8, 128.1, 126.5, 113.6, 45.2, 28.9, 15.1. IR (neat, cm<sup>-1</sup>): 2964, 2926, 1682, 1605, 1407, 994, 894, 827. ESI HRMS *m/z* (M+H)<sup>+</sup> calcd 251.1430, obsd 251.1429.

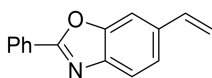

**2-Phenyl-6-vinylbenzo[d]oxazole (27).** The title compound was obtained through layer chromatography by following the **General Procedure A**, with the modification of using THF (6 mL) instead of THF (2.4 mL). White solid, yield = 68% (54 mg), current = 110 mA, electricity = 2.8 F mol<sup>-1</sup>. <sup>1</sup>H NMR (400 MHz, CDCl<sub>3</sub>) δ 8.32-8.25 (m, 2H), 7.74 (d, *J* = 8.0 Hz, 1H), 7.66 (s, 1H), 7.58-7.55 (m, 3H), 7.46 (d, *J* = 8.0 Hz, 1H), 6.87 (dd, *J*<sub>1</sub> = 17.6 Hz, *J*<sub>2</sub> = 10.8 Hz, 1H), 5.85 (d, *J* = 17.6 Hz, 1H), 5.35 (d, *J* = 10.8 Hz, 1H). <sup>13</sup>C NMR (101 MHz, CDCl<sub>3</sub>) δ 163.5, 151.3, 141.9, 136.6, 135.4, 131.5, 128.9, 127.6, 127.1, 123.4, 119.7, 114.2, 107.9. IR (neat, cm<sup>-1</sup>): 3048, 2928, 2850, 1626, 1494, 1457, 1425, 1406, 1322, 1264, 1204, 1129, 1104, 988, 928, 903, 823, 745. ESI HRMS *m/z* (M+H)<sup>+</sup> calcd 222.0913, obsd 222.0921.

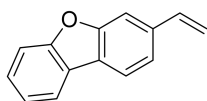

**3-Vinyldibenzo[b,d]furan (28).** The title compound was obtained through layer chromatography by following the **General Procedure B**. This compound known in the literature.<sup>17</sup> White solid, yield = 60% (42 mg), current = 100 mA, electricity = 3.4 F mol<sup>-1</sup>. <sup>1</sup>H NMR (400 MHz, CDCl<sub>3</sub>) δ 7.95 (d, *J* = 7.6 Hz, 1H), 7.91 (d, *J* = 7.6 Hz, 1H), 7.64 (s, 1H), 7.62-7.55 (m, 1H), 7.49-7.43 (m, 2H), 7.39-7.32 (m, 1H), 6.89 (dd, *J*<sub>1</sub> = 17.6 Hz, *J*<sub>2</sub> = 10.8 Hz, 1H), 5.89 (d, *J* = 17.6 Hz, 1H), 5.36 (d, *J* = 10.8 Hz, 1H). <sup>13</sup>C NMR (101 MHz, CDCl<sub>3</sub>) δ 156.7, 137.2, 136.8, 127.1, 126.5, 124.1, 123.9, 122.8, 121.4, 120.6, 120.5, 114.3, 111.6, 109.0.

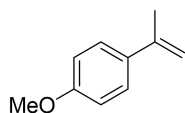

**1-Methoxy-4-(prop-1-en-2-yl)benzene (29).** The title compound was obtained by following the **General Procedure B**. The corresponding outlet solution was only need stirred at rt for 6 h without the addition of any additive to give product **29**. This compound known in the literature.<sup>18</sup> Colorless oil, yield = 56% (30 mg), current = 61 mA, electricity = 2.1 F mol<sup>-1</sup>. <sup>1</sup>H NMR (400 MHz, CDCl<sub>3</sub>) δ 7.45 (d, *J* = 8.8 Hz, 2H), 6.90 (d, *J* = 8.8 Hz, 2H), 5.32 (s, 1H), 5.02 (s, 1H), 3.84 (s, 3H), 2.16 (s, 3H). <sup>13</sup>C NMR (101 MHz, CDCl<sub>3</sub>) δ 159.1, 142.6, 133.8, 126.6, 113.5, 110.6, 55.2, 21.9.

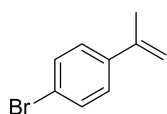

**1-Bromo-4-(prop-1-en-2-yl)benzene (30).** The title compound was obtained by following the **General Procedure A**. The corresponding outlet solution was only need stirred at rt for 6 h without the addition of any additive to give product **30**. This compound known in the literature.<sup>18</sup> Colorless oil, yield = 51% (36 mg), current = 96 mA, electricity = 2.5 F mol<sup>-1</sup>. <sup>1</sup>H NMR (400 MHz, CDCl<sub>3</sub>) δ 7.48 (d, *J* = 8.8 Hz, 2H), 7.36 (d, *J* = 8.4 Hz, 2H), 5.39 (s, 1H), 5.14 (s, 1H), 2.16 (s, 3H). <sup>13</sup>C NMR (101 MHz, CDCl<sub>3</sub>) δ 142.2, 140.1, 131.3, 127.1, 121.3, 113.0, 21.6.

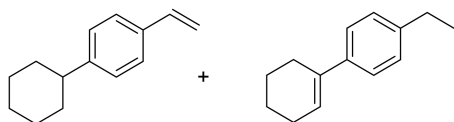

**1-Cyclohexyl-4-vinylbenzene/4'-ethyl-2,3,4,5-tetrahydro-1,1'-biphenyl (31/31').** The title compound was obtained as a 7:1 mixture of isomers through layer chromatography by following the **General Procedure A**, with the modification of using THF (6 mL) instead of THF (2.4 mL). This compound known in the literature.<sup>19</sup> Colorless oil, yield = 48% (32 mg), current = 124 mA, electricity = 3.2 F mol<sup>-1</sup>. <sup>1</sup>H NMR (400 MHz, CDCl<sub>3</sub>) δ 7.39–7.34 (m, 2H), 7.22–7.17 (m, 2H), 6.74 (dd, *J*<sub>1</sub> = 17.6 Hz, *J*<sub>2</sub> = 11.2 Hz, 0.88H), 6.17–6.10 (m, 0.12H), 5.75 (d, *J* = 17.6 Hz, 0.88H), 5.23 (d, *J* = 10.8 Hz, 0.88H), 2.70–2.24 (m, 2H), 1.90–1.68 (m, 4H), 1.51–1.26 (m, 5.24H). <sup>13</sup>C NMR (101 MHz, CDCl<sub>3</sub>) δ 147.9, 136.8, 135.3, 127.0, 126.2, 112.8, 44.3, 34.4, 26.9, 26.1.

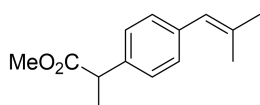

**Methyl 2-(4-(2-methylprop-1-en-1-yl)phenyl)propanoate (32).** The title compound

was obtained by following the **General Procedure A**. This compound known in the literature.<sup>20</sup> Colorless oil, yield = 73% (57 mg), current = 93 mA, electricity = 2.4 F mol<sup>-1</sup>. <sup>1</sup>H NMR (400 MHz, CDCl<sub>3</sub>) δ 7.27 (d, *J* = 7.6 Hz, 2H), 7.21 (d, *J* = 8.0 Hz, 2H), 6.27 (s, 1H), 3.74 (q, *J* = 7.2 Hz, 1H), 3.69 (s, 3H), 1.93 (s, 3H), 1.89 (s, 3H), 1.53 (d, *J* = 7.2 Hz, 3H). <sup>13</sup>C NMR (101 MHz, CDCl<sub>3</sub>) δ 175.1, 137.9, 137.6, 135.5, 129.0, 127.1, 124.7, 52.0, 45.1, 26.9, 19.4, 18.5.

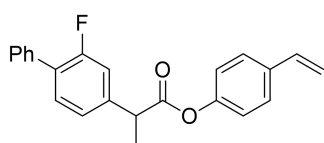

**4-Vinylphenyl 2-(2-fluoro-[1,1'-biphenyl]-4-yl)propanoate (33).** The title compound was obtained by following the **General Procedure A**, with the modification of using THF (6 mL) instead of THF (2.4 mL). This compound known in the literature.<sup>11</sup> Colorless oil, yield = 61% (76 mg), current = 116 mA, electricity = 3.0 F mol<sup>-1</sup>. <sup>1</sup>H NMR (400 MHz, CDCl<sub>3</sub>) δ 7.60 (d, *J* = 8.0 Hz, 2H), 7.51–7.42 (m, 6H), 7.31–7.24 (m, 2H), 7.04 (d, *J* = 8.4 Hz, 2H), 6.72 (dd, *J*<sub>1</sub> = 17.6 Hz, *J*<sub>2</sub> = 10.8 Hz, 1H), 5.73 (d, *J* = 17.6 Hz, 1H), 5.27 (d, *J* = 11.2 Hz, 1H), 4.03 (q, *J* = 7.2 Hz, 1H), 1.70 (d, *J* = 7.2 Hz, 3H). <sup>13</sup>C NMR (101 MHz, CDCl<sub>3</sub>) δ 172.4, 160.0 (d, *J*<sub>C-F</sub> = 248.0 Hz), 150.3, 141.2 (d, *J*<sub>C-F</sub> = 7.5 Hz), 135.8, 135.4 (d, *J*<sub>C-F</sub> = 5.1 Hz), 131.08, 131.04, 129.0 (d, *J*<sub>C-F</sub> = 2.8 Hz), 128.6 (d, *J*<sub>C-F</sub> = 23.7 Hz), 127.7, 127.1, 123.65, 123.62, 121.4, 115.3 (d, *J*<sub>C-F</sub> = 23.7 Hz), 114.1, 45.1, 18.4. <sup>19</sup>F NMR (376 MHz, CDCl<sub>3</sub>) δ -117.2.

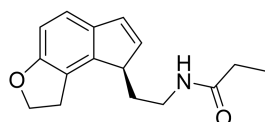

**(R)-N-(2-(2,8-Dihydro-1H-indeno[5,4-b]furan-8-yl)ethyl)propionamide (34).** The title compound was obtained by following the **General Procedure B**. White solid, yield = 44% (41 mg), current = 80 mA, electricity = 2.7 F mol<sup>-1</sup>. <sup>1</sup>H NMR (400 MHz, CDCl<sub>3</sub>) δ 7.12 (d, *J* = 8.0 Hz, 1H), 6.80 (dd, *J*<sub>1</sub> = 5.6 Hz, *J*<sub>2</sub> = 1.6 Hz, 1H), 6.73 (d, *J* = 8.0 Hz, 1H), 6.36 (dd, *J*<sub>1</sub> = 5.6 Hz, *J*<sub>2</sub> = 1.6 Hz, 1H), 5.34 (br s, 1H), 4.65–4.58 (m, 2H), 3.61 (br s, 1H), 3.39–3.07 (m, 4H), 2.26–2.20 (m, 1H), 2.07–1.97 (m, 3H), 1.06 (t, *J* = 7.6 Hz, 3H). <sup>13</sup>C NMR (101 MHz, CDCl<sub>3</sub>) δ 173.6, 158.9, 143.4, 137.4, 135.0, 131.7, 122.5, 120.4, 107.3, 71.3, 47.8, 37.1, 29.6, 28.5, 28.2, 9.7. IR (neat, cm<sup>-1</sup>): 3303, 2926, 1646, 1552, 1460, 1439, 1374, 1227, 1124, 988, 940, 810. ESI HRMS *m/z* (M+H)<sup>+</sup> calcd 258.1489, obsd 258.1495.

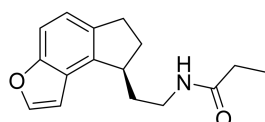

**(S)-N-(2-(7,8-Dihydro-6H-indeno[5,4-b]furan-8-yl)ethyl)propionamide (34')**. The title compound was obtained by following the **General Procedure B**. White solid, yield = 7% (6 mg), current = 80 mA, electricity = 2.7 F mol<sup>-1</sup>. <sup>1</sup>H NMR (400 MHz, CDCl<sub>3</sub>) δ 7.64 (d, *J* = 2.0 Hz, 1H), 7.34 (d, *J* = 8.0 Hz, 1H), 7.16 (d, *J* = 8.4 Hz, 1H), 6.79 (q, *J* = 1.2 Hz, 1H), 5.41 (br s, 1H), 3.51–3.37 (m, 3H), 3.09–2.91 (m, 2H), 2.44–2.38 (m, 1H), 2.22–2.13 (m, 3H), 1.98–1.92 (m, 1H), 1.81–1.76 (m, 1H), 1.13 (t, *J* = 7.6 Hz, 3H). <sup>13</sup>C NMR (101 MHz, CDCl<sub>3</sub>) δ 173.7, 154.7, 145.1, 138.6, 137.6, 123.6, 120.4, 109.6, 104.6, 42.4, 38.0, 34.5, 31.8, 31.3, 29.7, 9.8. IR (neat, cm<sup>-1</sup>): 3294, 3100, 2937, 2852, 1646, 1548, 1463, 1431, 1354, 1249, 1138, 1109, 1045, 805, 759. ESI HRMS *m/z* (M+H)<sup>+</sup> calcd 258.1489, obsd 258.1496.

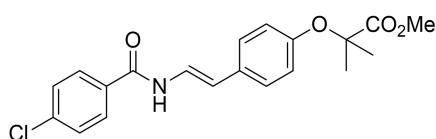

**(E)-Methyl 2-(4-(2-(4-chlorobenzamido)vinyl)phenoxy)-2-methylpropanoate (35)**. The title compound was obtained by following the **General Procedure B**. This compound known in the literature.<sup>21</sup> White solid, yield = 35% (47 mg), current = 68 mA, electricity = 2.3 F mol<sup>-1</sup>. <sup>1</sup>H NMR (400 MHz, CDCl<sub>3</sub>) δ 7.97 (d, *J* = 10.4 Hz, 1H), 7.82 (d, *J* = 8.4 Hz, 2H), 7.64–7.58 (m, 1H), 7.47 (d, *J* = 8.0 Hz, 2H), 7.26 (d, *J* = 7.6 Hz, 2H), 6.81 (d, *J* = 8.0 Hz, 2H), 6.25 (d, *J* = 14.8 Hz, 1H), 3.81 (s, 3H), 1.63 (s, 6H). <sup>13</sup>C NMR (101 MHz, CDCl<sub>3</sub>) δ 174.8, 163.3, 154.5, 138.4, 131.9, 130.0, 129.0, 128.5, 126.5, 121.8, 119.5, 113.5, 79.2, 52.5, 25.3.

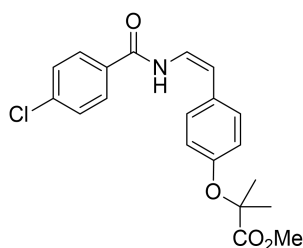

**(Z)-Methyl 2-(4-(2-(4-chlorobenzamido)vinyl)phenoxy)-2-methylpropanoate (35')**. The title compound was obtained by following the **General Procedure B**. This compound known in the literature.<sup>21</sup> White solid, yield = 6% (8 mg), current = 68 mA, electricity = 2.3 F mol<sup>-1</sup>. <sup>1</sup>H NMR (400 MHz, CDCl<sub>3</sub>) δ 8.26 (d, *J* = 10.4 Hz, 1H), 7.72 (d, *J* = 8.4 Hz, 2H), 7.47 (d, *J* = 8.4 Hz, 2H), 7.26 (d, *J* = 8.8 Hz, 2H), 7.17–7.12 (m, 1H), 6.91 (d, *J* = 8.4 Hz, 2H), 5.88 (d, *J* = 9.6 Hz, 1H), 3.82 (s, 3H), 1.66 (s, 6H). <sup>13</sup>C NMR (101 MHz, CDCl<sub>3</sub>) δ 174.7, 163.3, 154.4, 138.5, 131.7, 129.3, 129.1, 128.8, 128.5, 121.5, 119.5, 110.9, 52.6, 25.4.

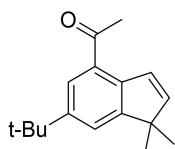

**1-(6-(*tert*-Butyl)-1,1-dimethyl-1*H*-inden-4-yl)ethanone (36).** The title compound was obtained by following the **General Procedure A**. This compound known in the literature.<sup>11</sup> White solid, yield = 84% (73 mg), current = 116 mA, electricity = 3.0 F mol<sup>-1</sup>. <sup>1</sup>H NMR (400 MHz, CDCl<sub>3</sub>) δ 7.75 (d, *J* = 1.2 Hz, 1H), 7.53 (d, *J* = 0.4 Hz, 1H), 7.39 (d, *J* = 5.6 Hz, 1H), 6.54 (d, *J* = 5.2 Hz, 1H), 2.66 (s, 3H), 1.41 (s, 9H), 1.34 (s, 6H). <sup>13</sup>C NMR (101 MHz, CDCl<sub>3</sub>) δ 200.2, 155.0, 150.2, 148.2, 140.0, 130.3, 127.7, 124.3, 122.2, 48.9, 34.8, 31.5, 28.3, 24.2.

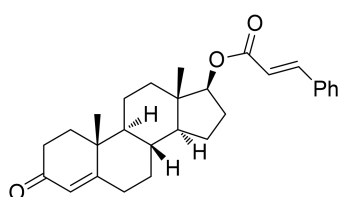

**(8*R*,9*S*,10*R*,13*S*,14*S*,17*S*)-10,13-Dimethyl-3-oxo-2,3,6,7,8,9,10,11,12,13,14,15,16,17-tetradecahydro-1*H*-cyclopenta[*a*]phenanthren-17-yl cinnamate (37).** The title compound was obtained by following the **General Procedure A**. This compound known in the literature.<sup>22</sup> White solid, yield = 44% (66 mg, *E* only, determined by <sup>1</sup>H NMR), current = 144 mA, electricity = 3.7 F mol<sup>-1</sup>. <sup>1</sup>H NMR (400 MHz, CDCl<sub>3</sub>) δ 7.70 (d, *J* = 16.0 Hz, 1H), 7.61-7.53 (m, 2H), 7.41 (d, *J* = 1.6 Hz, 3H), 6.48 (d, *J* = 16.0 Hz, 1H), 5.77 (s, 1H), 4.79 (t, *J* = 8.0 Hz, 1H), 2.46-1.23 (m, 16H), 1.16 (s, 3H), 1.14-1.00 (m, 3H), 0.95 (s, 3H). <sup>13</sup>C NMR (101 MHz, CDCl<sub>3</sub>) δ 199.5, 171.0, 167.0, 144.5, 134.5, 130.2, 128.9, 128.0, 124.0, 118.5, 82.5, 53.7, 50.3, 42.7, 38.6, 35.7, 35.4, 33.9, 32.7, 31.5, 27.6, 23.5, 20.5, 17.4, 12.1.

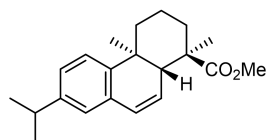

**(1*R*,4*aS*,10*aR*)-Methyl 7-isopropyl-1,4*a*-dimethyl-1,2,3,4,4*a*,10*a*-hexahydrophenanthrene-1-carboxylate (38).** The title compound was obtained by following the **General Procedure A**. This compound known in the literature.<sup>23</sup> White solid, yield = 51% (57 mg), current = 114 mA, electricity = 2.9 F mol<sup>-1</sup>. <sup>1</sup>H NMR (400 MHz, CDCl<sub>3</sub>) δ 7.13-7.08 (m, 2H), 6.94 (s, 1H), 6.54 (dd, *J*<sub>1</sub> = 9.6 Hz, *J*<sub>2</sub> = 3.2 Hz, 1H), 5.75 (dd, *J*<sub>1</sub> = 9.6 Hz, *J*<sub>2</sub> = 2.4 Hz, 1H), 3.67 (s, 3H), 2.95 (s, 1H), 2.92-2.87 (m, 1H), 2.23 (d, *J* = 11.2 Hz, 1H), 1.83-1.72 (m, 5H), 1.43 (s, 3H), 1.27 (d, *J* = 6.8 Hz, 6H), 1.11

(s, 3H).  $^{13}\text{C}$  NMR (101 MHz,  $\text{CDCl}_3$ )  $\delta$  178.5, 146.3, 145.1, 132.6, 129.8, 128.3, 125.7, 124.7, 121.6, 52.0, 46.6, 46.4, 37.1, 35.6, 35.3, 33.5, 23.9, 20.8, 18.4, 17.9.

## 5. Alkene Transformations

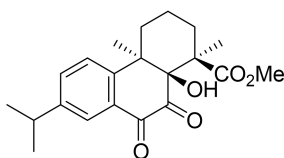

**(1R,4aR,10aS)-Methyl 10a-hydroxy-7-isopropyl-1,4a-dimethyl-9,10-dioxo-1,2,3,4,4a,9,10,10a-octahydrophenanthrene-1-carboxylate (40).** To a round bottom flask was added **38** (62 mg, 0.2 mmol), *tert*-butanol (1 mL), and water (1 mL), followed by the addition of AD-mix ( $\beta$ ) (750 mg) and  $\text{K}_2\text{OsO}_4 \cdot 2\text{H}_2\text{O}$  (3 mg, 7  $\mu\text{mol}$ ). The reaction mixture was stirred at room temperature for 3 days. Solid  $\text{Na}_2\text{SO}_3$  (0.2 g) was added to the mixture, which then stirred at room temperature for 1 h. Next, the reaction mixture was diluted with  $\text{H}_2\text{O}$  and extracted twice with  $\text{CH}_2\text{Cl}_2$ . The combined organic layers were washed with brine, dried with  $\text{MgSO}_4$  and concentrated under reduced pressure. The residue was purified by flash column chromatography to give **40** as yellow solid (86%, 62 mg). This compound known in the literature.<sup>23</sup>  $^1\text{H}$  NMR (400 MHz,  $\text{CDCl}_3$ )  $\delta$  7.97 (d,  $J = 2.0$  Hz, 1H), 7.53 (dd,  $J_1 = 8.4$  Hz,  $J_2 = 2.0$  Hz, 1H), 7.33 (d,  $J = 8.4$  Hz, 1H), 6.79 (s, 1H), 3.79 (s, 3H), 2.99–2.40 (m, 1H), 2.40–2.36 (m, 1H), 2.19–2.12 (m, 2H), 1.97–1.89 (m, 2H), 1.73 (s, 3H), 1.69–1.65 (m, 1H), 1.36 (s, 3H), 1.29 (d,  $J = 7.2$  Hz, 6H).  $^{13}\text{C}$  NMR (101 MHz,  $\text{CDCl}_3$ )  $\delta$  191.9, 183.9, 180.9, 151.4, 147.4, 134.3, 130.8, 126.2, 123.8, 81.8, 53.1, 46.5, 44.9, 33.5, 32.5, 30.6, 29.5, 23.7, 18.5, 17.5.

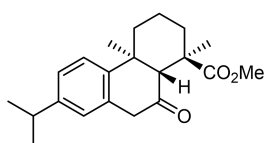

**(1R,4aS,10aR)-Methyl 7-isopropyl-1,4a-dimethyl-10-oxo-1,2,3,4,4a,9,10,10a-octahydrophenanthrene-1-carboxylate (41).** To an oven-dried round bottom flask was added **38** (62 mg, 0.2 mmol) and  $\text{CH}_2\text{Cl}_2$  (1.5 mL). Then, *m*-CPBA (61 mg, 0.3 mmol, 85%) was added to the mixture slowly at 0  $^\circ\text{C}$ . The resultant mixture was warmed to room temperature and stirred in dark for 5 h. Then,  $\text{Et}_2\text{O}$  was added to the mixture, which was subsequently washed with saturated aqueous KI solution,  $\text{Na}_2\text{S}_2\text{O}_3$  (2N) solution, and saturated aqueous  $\text{NaHCO}_3$  solution. The aqueous phase was extracted twice with  $\text{Et}_2\text{O}$ . The combined organic phase was then washed with brine, dried over  $\text{Na}_2\text{SO}_4$  and concentrated under reduced pressure. The residue and  $\text{TsOH} \cdot \text{H}_2\text{O}$  (46 mg,



0.24 mmol) were dissolved in 1 mL of benzene, stirred and heated at 80 °C under Ar for 2 h. After being cooled to room temperature, Et<sub>2</sub>O was added to the reaction mixture. The organic layer was washed with brine, aqueous NaHCO<sub>3</sub> solution and H<sub>2</sub>O and subsequently concentrated under reduced pressure. The residue was purified by a flash chromatography to give compound **41** as a colorless oil, yield = 44% (29 mg). This compound known in the literature.<sup>24</sup> <sup>1</sup>H NMR (400 MHz, CDCl<sub>3</sub>) δ 7.29 (d, *J* = 8.0 Hz, 1H), 7.17 (d, *J* = 8.0 Hz, 1H), 6.98 (s, 1H), 3.80-3.57 (m, 2H), 3.66 (s, 3H), 3.29 (s, 1H), 2.93–2.90 (m, 1H), 2.37–2.35 (m, 1H), 1.83–1.74 (m, 5H), 1.29 (s, 3H), 1.28 (d, *J* = 6.8 Hz, 6H), 1.24 (s, 3H). <sup>13</sup>C NMR (101 MHz, CDCl<sub>3</sub>) δ 209.2, 178.4, 147.1, 145.7, 131.5, 126.5, 125.1, 122.8, 59.0, 52.2, 43.8, 43.6, 38.1, 37.47, 37.40, 33.6, 24.1, 24.0, 23.9, 18.0, 17.0.

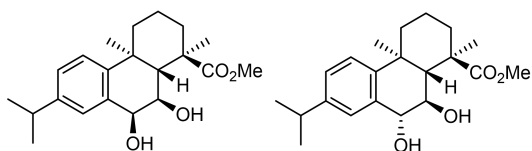

**Methyl (1*R*,4*aS*,9*S*,10*R*,10*aR*)-9,10-dihydroxy-7-isopropyl-1,4*a*-dimethyl-1,2,3,4,4*a*,9,10,10*a*-octahydrophenanthrene-1-carboxylate (42) and (1*R*,4*aS*,9*R*,10*R*,10*aR*)-methyl 9,10-dihydroxy-7-isopropyl-1,4*a*-dimethyl-1,2,3,4,4*a*,9,10,10*a*-octahydrophenanthrene-1-carboxylate (42')**. To a round bottom flask was added **38** (62 mg, 0.2 mmol) and CH<sub>3</sub>CN/H<sub>2</sub>O (2.6 mL, 1/1). Then, *m*-CPBA (61 mg, 0.3 mmol, 85%) was added to the mixture at 0 °C. The resultant mixture was warmed to room temperature and stirred for 0.5 h. Next, the reaction was quenched with saturated aqueous NaHCO<sub>3</sub> solution and extracted twice with EtOAc. The combined organic phase was dried over Na<sub>2</sub>SO<sub>4</sub> and concentrated under reduced pressure. The residue was purified by a flash chromatography to give compound **42** (39 mg, 57%) and **42'** (14 mg, 20%) as colorless oil.

**Compound 42:** <sup>1</sup>H NMR (400 MHz, CDCl<sub>3</sub>) δ 7.28 (s, 1H), 7.21 (d, *J* = 7.6 Hz, 2H), 4.74 (d, *J* = 4.4 Hz, 1H), 4.14–4.11 (m, 1H), 3.68 (s, 3H), 2.93–2.90 (m, 1H), 2.70 (d, *J* = 12.0 Hz, 1H), 2.32–2.29 (m, 1H), 1.82–1.52 (m, 6H), 1.49 (s, 3H), 1.27 (d, *J* = 7.2 Hz, 6H), 1.24 (s, 3H). <sup>13</sup>C NMR (101 MHz, CDCl<sub>3</sub>) δ 180.8, 147.0, 146.2, 134.5, 128.7, 127.3, 124.0, 70.9, 67.8, 52.1, 44.6, 44.1, 38.6, 38.0, 37.6, 33.5, 25.2, 24.0, 23.8, 18.3, 16.3. IR (neat, cm<sup>-1</sup>): 3447, 2957, 2868, 1703, 1497, 1459, 1250, 1039, 1006, 952, 892, 826, 734. ESI HRMS *m/z* (M+Na)<sup>+</sup> calcd 369.2036, obsd 369.2033.

**Compound 42':** <sup>1</sup>H NMR (400 MHz, CDCl<sub>3</sub>) δ 7.43 (s, 1H), 7.17 (d, *J* = 8.0 Hz, 2H), 4.67 (d, *J* = 8.0 Hz, 1H), 4.03–3.98 (m, 1H), 3.69 (s, 3H), 2.93–2.90 (m, 1H), 2.65 (d, *J* = 12.0 Hz, 1H), 2.30 (d, *J* = 12.8 Hz, 1H), 1.82–1.51 (m, 6H), 1.47 (s, 3H), 1.30 (s, 3H), 1.27 (d, *J* = 6.8 Hz, 6H). <sup>13</sup>C NMR (101 MHz, CDCl<sub>3</sub>) δ 181.1, 146.9, 145.6, 135.2,

126.1, 125.3, 123.8, 77.9, 72.8, 52.1, 47.7, 44.2, 38.9, 38.0, 37.5, 33.7, 26.2, 24.0, 23.8, 18.2, 16.7. IR (neat,  $\text{cm}^{-1}$ ): 3420, 2955, 2869, 1708, 1496, 1459, 1257, 1020, 986, 737. ESI HRMS  $m/z$  ( $\text{M}+\text{Na}$ )<sup>+</sup> calcd 369.2036, obsd 369.2033.

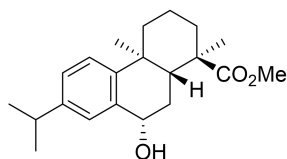

**(1R,4aS,10S,10aR)-Methyl 10-hydroxy-7-isopropyl-1,4a-dimethyl-1,2,3,4,4a,9,10,10a-octahydrophenanthrene-1-carboxylate (43).** To an oven-dried round bottom flask was added  $\text{BH}_3\cdot\text{SMe}_2$  (350  $\mu\text{L}$ , 2.0 M in THF, 0.7 mmol). Then, a solution of **38** (62 mg, 0.2 mmol) in THF (0.6 mL) was added to the flask under Ar at 0  $^\circ\text{C}$ . The resultant mixture was warmed to room temperature and stirred overnight. Next, the reaction was cooled to 0  $^\circ\text{C}$  and added NaOH (0.8 mL, 3 M in  $\text{H}_2\text{O}$ , 0.8 mmol) and 30%  $\text{H}_2\text{O}_2$  (0.3 mL). Then, the resultant mixture was warmed to room temperature and stirred for 2 h. The reaction was quenched with saturated aqueous  $\text{NaHSO}_3$  solution and extracted twice with EtOAc. The combined organic phase was washed with brine, dried over  $\text{Na}_2\text{SO}_4$  and concentrated under reduced pressure. The residue was purified by a flash chromatography to give compound **43** as a colorless oil, yield = 67% (44 mg). This compound known in the literature.<sup>23</sup>  $^1\text{H}$  NMR (400 MHz,  $\text{CDCl}_3$ )  $\delta$  7.25–7.21 (m, 2H), 7.16 (dd,  $J_1 = 8.0$  Hz,  $J_2 = 2.0$  Hz, 1H), 4.78 (d,  $J = 3.2$  Hz, 1H), 3.72 (s, 3H), 2.94–2.87 (m, 1H), 2.55–2.52 (m, 1H), 2.34 (d,  $J = 12.4$  Hz, 1H), 2.18–2.11 (m, 1H), 1.86–1.52 (m, 7H), 1.32 (s, 3H), 1.27 (d,  $J = 6.8$  Hz, 6H), 1.20 (s, 3H).  $^{13}\text{C}$  NMR (101 MHz,  $\text{CDCl}_3$ )  $\delta$  178.8, 146.6, 146.5, 136.1, 128.1, 126.5, 124.2, 68.1, 52.1, 47.2, 39.8, 37.7, 37.4, 36.5, 33.5, 31.2, 24.1, 24.0, 23.8, 18.6, 16.5. IR (neat,  $\text{cm}^{-1}$ ): 3411, 2953, 1724, 1455, 1383, 1250, 1179, 1123, 1071, 1048, 982, 953, 869.

## 6. Details for the Diverse Transformations

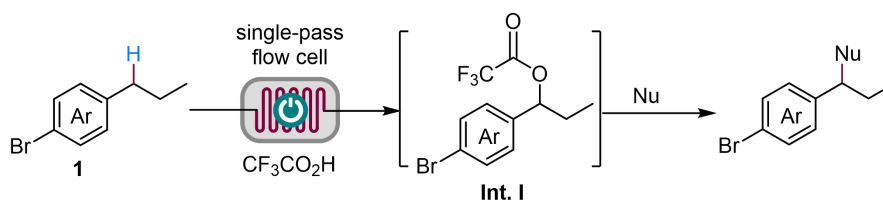

**General Procedure for the benzylic functionalized products.** The electrolysis was conducted using the same flow cell and electrodes described above in the procedure A. The solution containing 1-bromo-4-propylbenzene (0.06 M), TFA (4.0 equiv), 2,6-lutidine (1.5 equiv) in dry  $\text{CH}_2\text{Cl}_2/\text{HFIP}$  (19:1) was pushed using a syringe pump to pass

through the flow cell operated with a flow rate of 0.40 mL min<sup>-1</sup> and a constant current of 93 mA. 4 mL of the outlet solution was collected (10 min) and concentrated under reduced pressure. Then, the crude **Int. I** was treated with different nucleophiles and acids in a certain solvent (2 mL). When the reaction was completed. The mixture was diluted with H<sub>2</sub>O and extracted twice with EtOAc. The combined organic phase was concentrated under reduced pressure. The residue was chromatographed through silica gel eluting with ethyl acetate/petroleum ether to give the corresponding products (**44-54**).

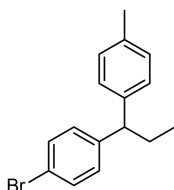

**1-Bromo-4-(1-(*p*-tolyl)propyl)benzene (44).** The crude **Int. I** was dissolved in toluene (2 mL), treated with concentrated H<sub>2</sub>SO<sub>4</sub> (4 equiv) and then stirred at 100 °C for 4 h. After being cooled to room temperature, the mixture was diluted with H<sub>2</sub>O and extracted twice with EtOAc. The combined organic phase was concentrated under reduced pressure. The residue was chromatographed through silica gel eluting with ethyl acetate/petroleum ether to give the corresponding compound **44** as a colorless oil, yield = 76% (53 mg). <sup>1</sup>H NMR (400 MHz, CDCl<sub>3</sub>) δ 7.43 (d, *J* = 8.0 Hz, 2H), 7.14–7.16 (m, 6H), 3.76 (t, *J* = 8.0 Hz, 1H), 2.35 (s, 3H), 2.09–2.05 (m, 2H), 0.94 (t, *J* = 7.6 Hz, 3H). <sup>13</sup>C NMR (101 MHz, CDCl<sub>3</sub>) δ 144.5, 141.5, 135.7, 131.4, 129.6, 129.2, 127.6, 119.7, 52.2, 28.4, 20.9, 12.7. IR (neat, cm<sup>-1</sup>): 3019, 2961, 2928, 2872, 1513, 1487, 1458, 1403, 1378, 1074, 1009, 803. ESI HRMS *m/z* (M+Na)<sup>+</sup> calcd 311.0408, obsd 311.0405

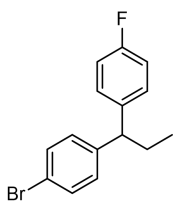

**1-Bromo-4-(1-(4-fluorophenyl)propyl)benzene (45).** The crude **Int. I** was treated with fluorobenzene (4 mL), HBF<sub>4</sub>·Et<sub>2</sub>O (4 equiv) and stirred at room temperature for 4 h. Then, the mixture was diluted with H<sub>2</sub>O and extracted twice with EtOAc. The combined organic phase was concentrated under reduced pressure. The residue was obtained through layer chromatography with petroleum ether to give the corresponding compound **45** as a colorless oil, yield = 53% (37 mg). <sup>1</sup>H NMR (400 MHz, CDCl<sub>3</sub>) δ 7.42 (d, *J* = 8.8 Hz, 2H), 7.18–7.15 (m, 2H), 7.09 (d, *J* = 8.0 Hz, 2H), 7.00–6.96 (m, 2H), 3.76 (t, *J* = 8.0 Hz, 1H), 2.07–1.99 (m, 2H), 0.90 (t, *J* = 7.6 Hz, 3H). <sup>13</sup>C NMR (101

MHz, CDCl<sub>3</sub>)  $\delta$  161.4 (d,  $J_{C-F}$  = 243.6 Hz), 144.0, 140.2 (d,  $J_{C-F}$  = 3.2 Hz), 131.5, 129.6, 129.2 (d,  $J_{C-F}$  = 7.5 Hz), 119.9, 115.2 (d,  $J_{C-F}$  = 21.0 Hz), 51.8, 28.5, 12.6. <sup>19</sup>F NMR (376 MHz, CDCl<sub>3</sub>)  $\delta$  -117.0. IR (neat, cm<sup>-1</sup>): 2963, 2927, 2873, 1603, 1507, 1487, 1222, 1157, 1009, 815. ESI HRMS  $m/z$  (M+H)<sup>+</sup> calcd 293.0336, obsd 293.0340.

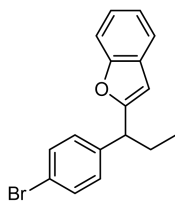

**2-(1-(4-Bromophenyl)propyl)benzofuran (46).** The crude **Int. I** was treated with benzofuran (5 equiv), CH<sub>2</sub>Cl<sub>2</sub> (2 mL), HBF<sub>4</sub>·Et<sub>2</sub>O (4 equiv) and then stirred at room temperature for 6 h. The mixture was diluted with H<sub>2</sub>O and extracted twice with CH<sub>2</sub>Cl<sub>2</sub>. The combined organic phase was concentrated under reduced pressure. The residue was chromatographed through silica gel eluting with ethyl acetate/petroleum ether to give the corresponding compound **46** as a colorless oil, yield = 55% (41 mg). <sup>1</sup>H NMR (400 MHz, CDCl<sub>3</sub>)  $\delta$  7.53–7.41 (m, 4H), 7.28–7.19 (m, 4H), 6.48 (s, 1H), 3.94 (t,  $J$  = 8.0 Hz, 1H), 2.31–2.24 (m, 1H), 2.03–1.96 (m, 1H), 0.98 (t,  $J$  = 7.2 Hz, 3H). <sup>13</sup>C NMR (101 MHz, CDCl<sub>3</sub>)  $\delta$  160.4, 154.8, 140.9, 131.6, 129.8, 128.5, 123.5, 122.5, 120.6, 120.5, 111.0, 102.5, 46.9, 27.4, 12.3. IR (neat, cm<sup>-1</sup>): 2964, 2930, 2873, 1582, 1487, 1454, 1406, 1254, 1167, 1074, 1010, 955, 815, 798, 748. ESI HRMS  $m/z$  (M)<sup>+</sup> calcd 314.0300, obsd 314.0297.

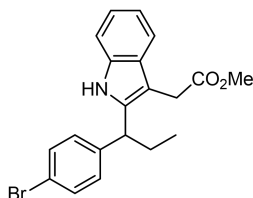

**Methyl 2-(2-(1-(4-bromophenyl)propyl)-1H-indol-3-yl)acetate (47).** The crude **Int. I** was treated with methyl 2-(1H-indol-3-yl)acetate (5 equiv), CH<sub>2</sub>Cl<sub>2</sub> (2 mL), HBF<sub>4</sub>·Et<sub>2</sub>O (4 equiv) and then stirred at room temperature for 6 h. The mixture was diluted with H<sub>2</sub>O and extracted twice with CH<sub>2</sub>Cl<sub>2</sub>. The combined organic phase was concentrated under reduced pressure. The residue was chromatographed through silica gel eluting with ethyl acetate/petroleum ether to give the corresponding compound **47** as a white solid, yield = 43% (40 mg). <sup>1</sup>H NMR (400 MHz, CDCl<sub>3</sub>)  $\delta$  7.83 (br s, 1H), 7.61 (dd,  $J_1$  = 8.4 Hz,  $J_2$  = 1.2 Hz, 1H), 7.45 (d,  $J$  = 8.4 Hz, 2H), 7.29–7.28 (m, 1H), 7.18–7.13 (m, 4H), 4.23 (t,  $J$  = 8.4 Hz, 1H), 3.77 (s, 2H), 3.64 (s, 3H), 2.19–2.06 (m, 2H), 0.98 (t,  $J$  = 7.2 Hz, 3H). <sup>13</sup>C NMR (101 MHz, CDCl<sub>3</sub>)  $\delta$  172.2, 141.6, 137.8, 135.3, 131.7, 129.4, 128.3, 121.8, 120.4, 119.8, 110.6, 105.4, 51.9, 43.3, 30.3, 27.4, 12.4. IR (neat, cm<sup>-1</sup>):

3393, 2961, 2931, 2873, 1727, 1488, 1461, 1435, 1309, 1271, 1239, 1164, 1074, 1009, 820, 743. ESI HRMS  $m/z$  (M+H)<sup>+</sup> calcd 386.0750, obsd 386.0750.

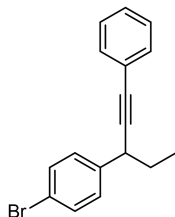

**1-Bromo-4-(1-phenylpent-1-yn-3-yl)benzene (48).** The crude **Int. I** was treated with trimethyl(phenylethynyl)silane (5 equiv), CH<sub>2</sub>Cl<sub>2</sub> (2 mL), BF<sub>3</sub>·Et<sub>2</sub>O (4 equiv) and then stirred at room temperature for 6 h. The mixture was diluted with H<sub>2</sub>O and extracted twice with CH<sub>2</sub>Cl<sub>2</sub>. The combined organic phase was concentrated under reduced pressure. The residue was chromatographed through silica gel eluting with ethyl acetate/petroleum ether to give the corresponding compound **48** as a colorless oil, yield = 42% (30 mg). This compound known in the literature.<sup>25</sup> <sup>1</sup>H NMR (400 MHz, CDCl<sub>3</sub>) δ 7.50–7.46 (m, 4H), 7.34–7.29 (m, 5H), 3.79 (t,  $J$  = 7.2 Hz, 1H), 1.90–1.85 (m, 2H), 1.08 (t,  $J$  = 7.2 Hz, 3H). <sup>13</sup>C NMR (101 MHz, CDCl<sub>3</sub>) δ 141.0, 131.6, 131.5, 129.3, 128.2, 127.9, 123.5, 120.4, 90.7, 83.7, 39.4, 31.5, 11.7.

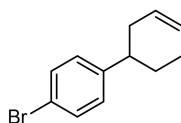

**1-Bromo-4-(hex-5-en-3-yl)benzene (49).** The crude **Int. I** was treated with allyltrimethylsilane (5 equiv), CH<sub>2</sub>Cl<sub>2</sub> (2 mL), BF<sub>3</sub>·Et<sub>2</sub>O (4 equiv) and then stirred at room temperature for 6 h. The mixture was diluted with H<sub>2</sub>O and extracted twice with CH<sub>2</sub>Cl<sub>2</sub>. The combined organic phase was concentrated under reduced pressure. The residue was chromatographed through silica gel eluting with ethyl acetate/petroleum ether to give the corresponding compound **49** as a colorless oil, yield = 64% (37 mg). <sup>1</sup>H NMR (400 MHz, CDCl<sub>3</sub>) δ 7.43 (d,  $J$  = 7.6 Hz, 2H), 7.04 (d,  $J$  = 8.0 Hz, 2H), 5.65 (dd,  $J_1$  = 17.2 Hz,  $J_2$  = 7.6 Hz, 1H), 4.99–4.93 (m, 2H), 2.50–2.32 (m, 3H), 1.74–1.54 (m, 2H), 0.79 (t,  $J$  = 7.2 Hz, 3H). <sup>13</sup>C NMR (101 MHz, CDCl<sub>3</sub>) δ 144.1, 136.7, 131.3, 129.5, 119.5, 116.0, 47.1, 40.7, 28.7, 11.9. IR (neat, cm<sup>-1</sup>): 3077, 2962, 2926, 2873, 1640, 1488, 1462, 1406, 1379, 1074, 1009, 994, 913, 824. ESI HRMS  $m/z$  (M+Na)<sup>+</sup> calcd 261.0249, obsd 261.0258.

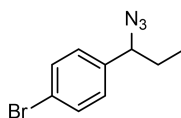

**1-(1-Azidopropyl)-4-bromobenzene (50).** The crude **Int. I** was treated with

azidotrimethylsilane (5 equiv), CH<sub>2</sub>Cl<sub>2</sub> (2 mL), BF<sub>3</sub>·Et<sub>2</sub>O (4 equiv) and then stirred at room temperature for 6 h. The mixture was diluted with H<sub>2</sub>O and extracted twice with CH<sub>2</sub>Cl<sub>2</sub>. The combined organic phase was concentrated under reduced pressure.<sup>26</sup> The residue was chromatographed through silica gel eluting with ethyl acetate/petroleum ether to give the corresponding compound **50** as a colorless oil, yield = 67% (38 mg). This compound known in the literature. <sup>1</sup>H NMR (400 MHz, CDCl<sub>3</sub>) δ 7.54–7.51 (m, 2H), 7.20–7.18 (m, 2H), 4.34 (t, *J* = 7.2 Hz, 1H), 1.90–1.74 (m, 2H), 0.94 (t, *J* = 7.2 Hz, 3H). <sup>13</sup>C NMR (101 MHz, CDCl<sub>3</sub>) δ 138.7, 131.8, 128.6, 122.0, 67.1, 29.3, 10.5.

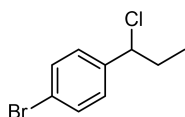

**1-Bromo-4-(1-chloropropyl)benzene (51).** The crude **Int. I** was treated with HCl (20 equiv), HFIP (2 mL) and then stirred at room temperature for 3 h. The mixture was diluted with H<sub>2</sub>O and extracted twice with EtOAc. The combined organic phase was concentrated under reduced pressure. The residue was chromatographed through silica gel eluting with ethyl acetate/petroleum ether to give the corresponding compound **51** as a colorless oil, yield = 61% (34 mg). This compound known in the literature.<sup>27</sup> <sup>1</sup>H NMR (400 MHz, CDCl<sub>3</sub>) δ 7.50 (d, *J* = 8.4 Hz, 2H), 7.27 (d, *J* = 8.4 Hz, 2H), 4.75 (t, *J* = 7.2 Hz, 1H), 2.13–2.05 (m, 2H), 1.01 (t, *J* = 7.2 Hz, 3H). <sup>13</sup>C NMR (101 MHz, CDCl<sub>3</sub>) δ 140.8, 131.7, 128.7, 122.0, 64.4, 33.1, 11.5.

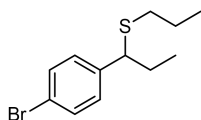

**(1-(4-Bromophenyl)propyl)(propyl)sulfane (52).** The crude **Int. I** was treated with propane-1-thiol (20 equiv), CH<sub>2</sub>Cl<sub>2</sub> (2 mL), BF<sub>3</sub>·Et<sub>2</sub>O (4 equiv) and then stirred at room temperature for 1 h. The mixture was diluted with H<sub>2</sub>O and extracted twice with CH<sub>2</sub>Cl<sub>2</sub>. The combined organic phase was concentrated under reduced pressure. The residue was chromatographed through silica gel eluting with ethyl acetate/petroleum ether to give the corresponding compound **52** as a colorless oil, yield = 83% (54 mg). <sup>1</sup>H NMR (400 MHz, CDCl<sub>3</sub>) δ 7.46 (d, *J* = 8.0 Hz, 2H), 7.21 (d, *J* = 8.4 Hz, 2H), 3.67–3.64 (m, 1H), 2.32–2.20 (m, 2H), 1.95–1.77 (m, 2H), 1.56–1.49 (m, 2H), 0.95–0.90 (m, 6H). <sup>13</sup>C NMR (101 MHz, CDCl<sub>3</sub>) δ 142.1, 131.4, 129.6, 120.5, 50.9, 33.0, 29.7, 22.6, 13.5, 12.3. IR (neat, cm<sup>-1</sup>): 2962, 2930, 2872, 1588, 1487, 1460, 1403, 1377, 1290, 1240, 1201, 1073, 1010, 816. ESI HRMS *m/z* (M+H)<sup>+</sup> calcd 273.0307, obsd 273.0311.

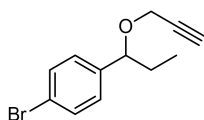

**1-Bromo-4-(1-(prop-2-yn-1-yloxy)propyl)benzene (53).** The crude **Int. I** was treated with prop-2-yn-1-ol (20 equiv), CH<sub>2</sub>Cl<sub>2</sub> (2 mL), BF<sub>3</sub>·Et<sub>2</sub>O (4 equiv) and then stirred at room temperature for 6 h. The mixture was diluted with H<sub>2</sub>O and extracted twice with CH<sub>2</sub>Cl<sub>2</sub>. The combined organic phase was concentrated under reduced pressure. The residue was obtained through layer chromatography silica gel eluting with ethyl acetate/petroleum ether to give the corresponding compound **53** as a colorless oil, yield = 50% (30 mg). <sup>1</sup>H NMR (400 MHz, CDCl<sub>3</sub>) δ 7.51 (d, *J* = 8.0 Hz, 2H), 7.21 (d, *J* = 8.0 Hz, 2H), 4.38 (t, *J* = 6.8 Hz, 1H), 4.13 (dd, *J*<sub>1</sub> = 16.0 Hz, *J*<sub>2</sub> = 2.0 Hz, 1H), 3.88 (dd, *J*<sub>1</sub> = 16.0 Hz, *J*<sub>2</sub> = 2.0 Hz, 1H), 2.43 (d, *J* = 2.0 Hz, 1H), 1.89–1.84 (m, 1H), 1.73–1.67 (m, 1H), 0.91 (t, *J* = 7.2 Hz, 3H). <sup>13</sup>C NMR (101 MHz, CDCl<sub>3</sub>) δ 140.3, 131.6, 128.7, 121.6, 81.7, 79.8, 74.1, 55.7, 30.6, 10.0. IR (neat, cm<sup>-1</sup>): 3310, 2922, 2850, 2215, 1634, 1470, 1385, 1072, 1011, 817, 637. ESI HRMS *m/z* (M+Na)<sup>+</sup> calcd 275.0042, obsd 275.0039.

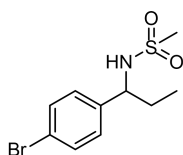

**N-(1-(4-Bromophenyl)propyl)methanesulfonamide (54).** The crude **Int. I** was treated with methanesulfonamide (10 equiv), CH<sub>2</sub>Cl<sub>2</sub> (2 mL), BF<sub>3</sub>·Et<sub>2</sub>O (4 equiv) and then stirred at room temperature for 6 h. The mixture was diluted with H<sub>2</sub>O and extracted twice with CH<sub>2</sub>Cl<sub>2</sub>. The combined organic phase was concentrated under reduced pressure. The residue was chromatographed through silica gel eluting with ethyl acetate/petroleum ether to give the corresponding compound **54** as a colorless oil, yield = 72% (50 mg). <sup>1</sup>H NMR (400 MHz, CDCl<sub>3</sub>) δ 7.51 (d, *J* = 8.0 Hz, 2H), 7.21 (d, *J* = 7.2 Hz, 2H), 5.48 (d, *J* = 16.4 Hz, 1H), 4.36–4.30 (m, 1H), 2.63 (s, 3H), 1.89–1.72 (m, 2H), 0.91 (t, *J* = 7.2 Hz, 3H). <sup>13</sup>C NMR (101 MHz, CDCl<sub>3</sub>) δ 140.6, 132.0, 128.5, 121.7, 59.2, 41.9, 30.6, 10.6. IR (neat, cm<sup>-1</sup>): 3280, 2968, 2933, 2876, 1488, 1410, 1313, 1154, 1050, 1009, 976, 838, 821, 756. ESI HRMS *m/z* (M+Na)<sup>+</sup> calcd 313.9821, obsd 313.9827.

## 7. Synthesis and Characterization of New Substrates

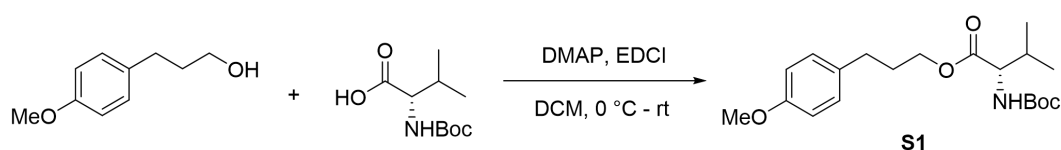

**2-(4-Methoxyphenyl)propyl (*tert*-butoxycarbonyl)-*L*-valinate (S1).** To an oven-dried round bottom flask was added (*tert*-butoxycarbonyl)-*L*-valine (0.61 g, 2.8 mmol), 3-(4-methoxyphenyl)propan-1-ol (0.42 g, 2.5 mmol), DMAP (0.03 g, 0.25 mmol) and CH<sub>2</sub>Cl<sub>2</sub> (15 mL). Then, EDCI (0.58 g, 3 mmol) was added to the flask slowly at 0 °C. The resultant mixture was warmed to room temperature and stirred until complete consumption of 3-(4-methoxyphenyl)propan-1-ol. Next, the mixture was diluted with saturated NH<sub>4</sub>Cl and extracted with CH<sub>2</sub>Cl<sub>2</sub>. The organic phase was concentrated under reduced pressure. The residue was purified by silica gel column chromatography to afford **S1** (0.78 g, 86% yield) as a colorless oil.<sup>28</sup> <sup>1</sup>H NMR (400 MHz, CDCl<sub>3</sub>) δ 7.10 (d, *J* = 8.0 Hz, 2H), 6.85 (d, *J* = 8.4 Hz, 2H), 5.07 (d, *J* = 8.0 Hz, 1H), 4.25–4.13 (m, 3H), 3.80 (d, *J* = 0.8 Hz, 3H), 2.65 (t, *J* = 8.0 Hz, 2H), 2.18–1.92 (m, 3H), 1.00 (s, 9H), 0.99 (d, *J* = 6.8 Hz, 3H), 0.93 (d, *J* = 6.8 Hz, 3H). <sup>13</sup>C NMR (101 MHz, CDCl<sub>3</sub>) δ 172.5, 157.9, 155.7, 133.0, 129.3, 113.9, 79.7, 64.4, 58.6, 55.2, 31.3, 31.1, 30.4, 26.3, 19.0, 17.6.

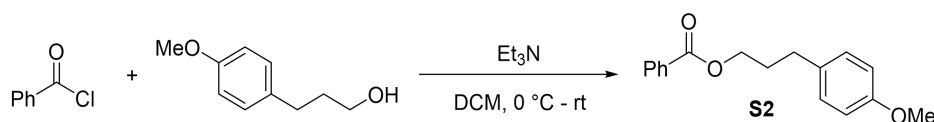

**3-(4-Methoxyphenyl)propyl benzoate (S2).** To an oven-dried round bottom flask was added 3-(4-methoxyphenyl)propan-1-ol (0.66 g, 4 mmol), Et<sub>3</sub>N (1.0 mL, 7.2 mmol) and CH<sub>2</sub>Cl<sub>2</sub> (12 mL). Then, benzoyl chloride (0.67 g, 4.8 mmol) was added to the flask slowly at 0 °C. The resultant mixture was warmed to room temperature and stirred until complete consumption of 3-(4-methoxyphenyl)propan-1-ol. Next, the mixture was diluted with CH<sub>2</sub>Cl<sub>2</sub> and washed with H<sub>2</sub>O. The organic phase was concentrated under reduced pressure. The residue was purified by silica gel column chromatography to afford **S2** (0.98 g, 91% yield) as a colorless oil. <sup>1</sup>H NMR (400 MHz, CDCl<sub>3</sub>) δ 8.10 (d, *J* = 8.0 Hz, 2H), 7.63–7.58 (m, 1H), 7.52–7.47 (m, 2H), 7.19 (d, *J* = 8.4 Hz, 2H), 6.90 (d, *J* = 8.8 Hz, 2H), 4.39 (t, *J* = 6.4 Hz, 2H), 3.82 (s, 3H), 2.79 (t, *J* = 7.6 Hz, 2H), 2.16–2.09 (m, 2H). <sup>13</sup>C NMR (101 MHz, CDCl<sub>3</sub>) δ 166.6, 158.0, 133.2, 132.9, 130.4, 129.6, 129.4, 128.4, 113.9, 64.3, 55.2, 31.4, 30.5. ESI HRMS *m/z* (M+H)<sup>+</sup> calcd 271.1329, obsd 271.1325.

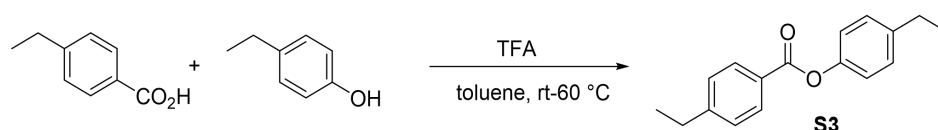

**4-Ethylbenzyl benzoate (S3).** To a round bottom flask was added 4-ethylbenzoic acid (0.83 mL, 5.5 mmol), 4-ethylphenol (0.61 mg, 5 mmol), TFA (1.53 mL, 11 mmol) and toluene (10 mL) at room temperature. The resultant mixture was warmed to 60 °C and



stirred until complete consumption of 4-ethylphenol. After being cooled to room temperature, the mixture was diluted with  $\text{CH}_2\text{Cl}_2$  and washed with  $\text{H}_2\text{O}$ . The organic phase was concentrated under reduced pressure. The residue was purified by silica gel column chromatography to afford **S3** (1.1 g, 87% yield) as a colorless oil.  $^1\text{H}$  NMR (400 MHz,  $\text{CDCl}_3$ )  $\delta$  8.21–8.18 (m, 2H), 7.39 (d,  $J = 7.2$  Hz, 2H), 7.31 (d,  $J = 8.4$  Hz, 2H), 7.20–7.17 (m, 2H), 2.83–2.71 (m, 4H), 1.37–1.30 (m, 6H).  $^{13}\text{C}$  NMR (101 MHz,  $\text{CDCl}_3$ )  $\delta$  165.5, 150.5, 148.9, 141.7, 130.3, 128.8, 128.1, 127.1, 121.5, 29.1, 28.3, 15.6, 15.3. ESI HRMS  $m/z$  ( $\text{M}+\text{H}$ ) $^+$  calcd 255.1380, obsd 255.1386.

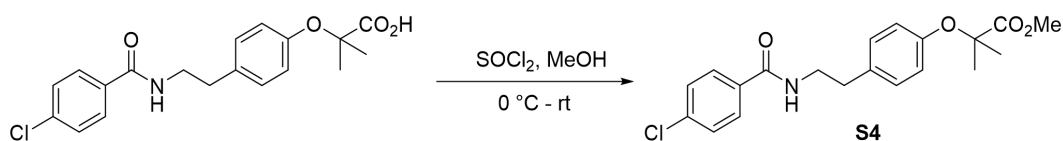

**Methyl 2-(4-(2-(4-chlorobenzamido)ethyl)phenoxy)-2-methylpropanoate (S4).** To an oven-dried round bottom flask was added 2-(4-(2-(4-chlorobenzamido)ethyl)phenoxy)-2-methylpropanoic acid (1.8 g, 5 mmol) and MeOH (30 mL). Then,  $\text{SOCl}_2$  (0.5 mL, 7.5 mmol) was added to the flask slowly at 0 °C. The resultant mixture was warmed to room temperature and stirred until complete consumption of 2-(4-(2-(4-chlorobenzamido)ethyl)phenoxy)-2-methylpropanoic acid. Next, the mixture was diluted with aqueous saturated  $\text{NaHCO}_3$  solution and extracted with EtOAc. The organic phase was concentrated under reduced pressure. The residue was purified by silica gel column chromatography to afford **S4** (1.7 g, 90% yield) as a white solid.  $^1\text{H}$  NMR (400 MHz,  $\text{CDCl}_3$ )  $\delta$  7.64 (d,  $J = 8.0$  Hz, 2H), 7.39 (d,  $J = 8.4$  Hz, 2H), 7.11 (d,  $J = 8.4$  Hz, 2H), 6.82 (d,  $J = 8.4$  Hz, 2H), 6.21 (br s, 1H), 3.79 (s, 3H), 3.68 (q,  $J = 6.8$  Hz, 2H), 2.88 (t,  $J = 6.8$  Hz, 2H), 1.61 (s, 6H).  $^{13}\text{C}$  NMR (101 MHz,  $\text{CDCl}_3$ )  $\delta$  174.8, 166.4, 154.0, 137.6, 133.0, 132.5, 129.5, 128.8, 128.3, 119.6, 79.2, 52.5, 41.2, 34.7, 25.3. ESI HRMS  $m/z$  ( $\text{M}+\text{Na}$ ) $^+$  calcd 398.1130, obsd 398.1134.

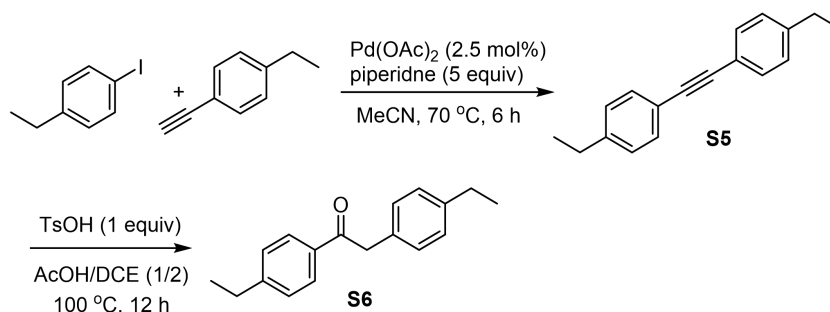

**1,2-Bis(4-ethylphenyl)ethyne (S5).** To a sealed tube was added 1-ethyl-4-iodobenzene (928 mg, 4 mmol). Then, 1-ethyl-4-ethynylbenzene (560  $\mu\text{L}$ , 4 mmol),  $\text{Pd(OAc)}_2$  (23 mg, 0.1 mmol), piperidine (2 mL), and MeCN (4 mL) were added to the tube at room

temperature. The resultant mixture was warmed to 70 °C and stirred for 6 h. After being cooled to room temperature, the reaction was quenched with 1.8 M HCl solution and extracted twice with EtOAc. The combined organic phase was washed with brine, dried over Na<sub>2</sub>SO<sub>4</sub> and concentrated under reduced pressure. The residue was purified by a flash chromatography to give 1,2-bis(4-ethylphenyl)ethyne as a white solid, yield = 51% (477 mg).<sup>29</sup> <sup>1</sup>H NMR (400 MHz, CDCl<sub>3</sub>) δ 7.49 (d, *J* = 8.0 Hz, 4H), 7.22 (d, *J* = 8.0 Hz, 4H), 2.71 (q, *J* = 7.6 Hz, 4H), 1.29 (t, *J* = 7.6 Hz, 6H). <sup>13</sup>C NMR (101 MHz, CDCl<sub>3</sub>) δ 144.5, 131.5, 127.9, 120.7, 88.9, 28.8, 15.4.

**1,2-Bis(4-ethylphenyl)ethan-1-one (S6).** To a sealed tube was added 1,2-bis(4-ethylphenyl)ethyne (302 mg, 1.3 mmol). Then, TsOH·H<sub>2</sub>O (247 mg, 1.3 mmol), AcOH (650 μL), and DCE (1.3 mL) were added to the tube at room temperature. The resultant mixture was warmed to 100 °C and stirred for 12 h. After being cooled to room temperature, the reaction was quenched with saturated NaHCO<sub>3</sub> solution and extracted twice with CH<sub>2</sub>Cl<sub>2</sub>. The combined organic phase was washed with brine, dried over Na<sub>2</sub>SO<sub>4</sub> and concentrated under reduced pressure. The residue was purified by a flash chromatography to give 1,2-bis(4-ethylphenyl)ethan-1-one as a yellow solid, yield = 75% (246 mg). <sup>1</sup>H NMR (400 MHz, CDCl<sub>3</sub>) δ 8.01-7.74 (m, 2H), 7.30 (d, *J* = 7.6 Hz, 2H), 7.21 (d, *J* = 8.0 Hz, 2H), 7.18 (d, *J* = 8.4 Hz, 2H), 4.25 (s, 2H), 2.75-2.62 (m, 4H), 1.29-1.22 (m, 6H). <sup>13</sup>C NMR (101 MHz, CDCl<sub>3</sub>) δ 197.4, 150.0, 142.7, 134.4, 131.9, 129.3, 128.9, 128.18, 128.13, 45.0, 28.9, 28.4, 15.4, 15.1. ESI HRMS *m/z* (M+Na)<sup>+</sup> calcd 275.1406, obsd 275.1401.

## 8. Mechanistic Studies

### 8.1 Dehydration of benzyl alcohol

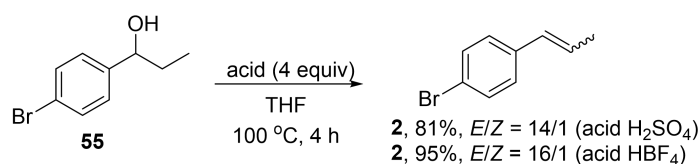

To an oven-dried round bottom flask was added 1-(4-bromophenyl)propan-1-ol **55** (22 mg, 0.1 mmol), acid (0.4 mmol) and THF (0.5 mL). The reaction mixture was warmed to 100 °C and stirred for 4 h. After being cooled to room temperature, the resulting mixture was concentrated under reduced pressure and analyzed by <sup>1</sup>H NMR in CDCl<sub>3</sub>. Yield of **2** was determined by <sup>1</sup>H NMR analysis using 1,3,5-trimethoxybenzene (0.1 mmol) as the internal standard. The ratio of *E/Z* of **2** was determined by GC analysis (Figure S3).

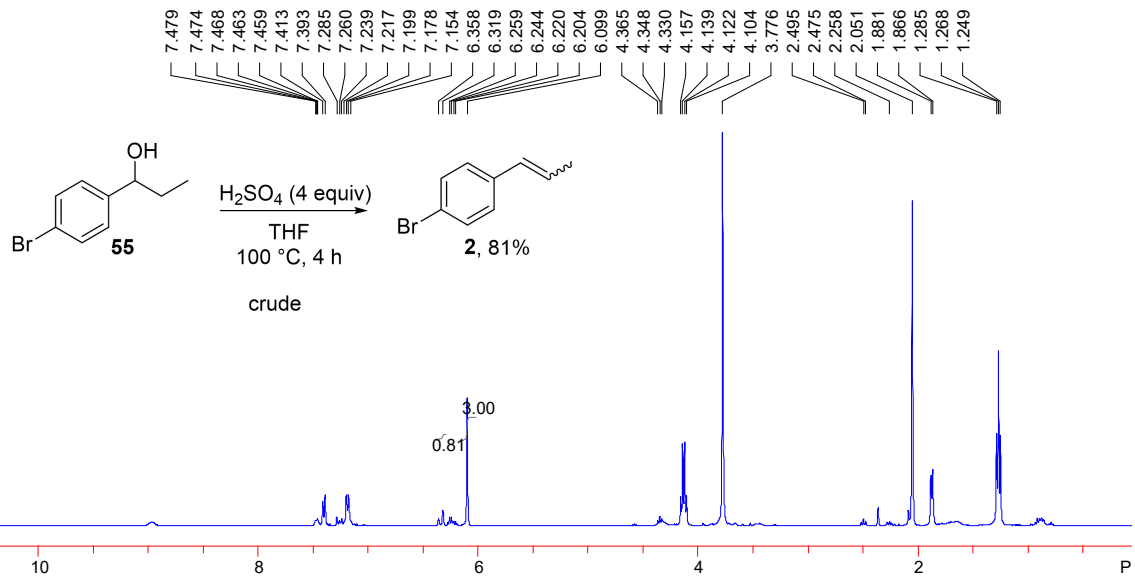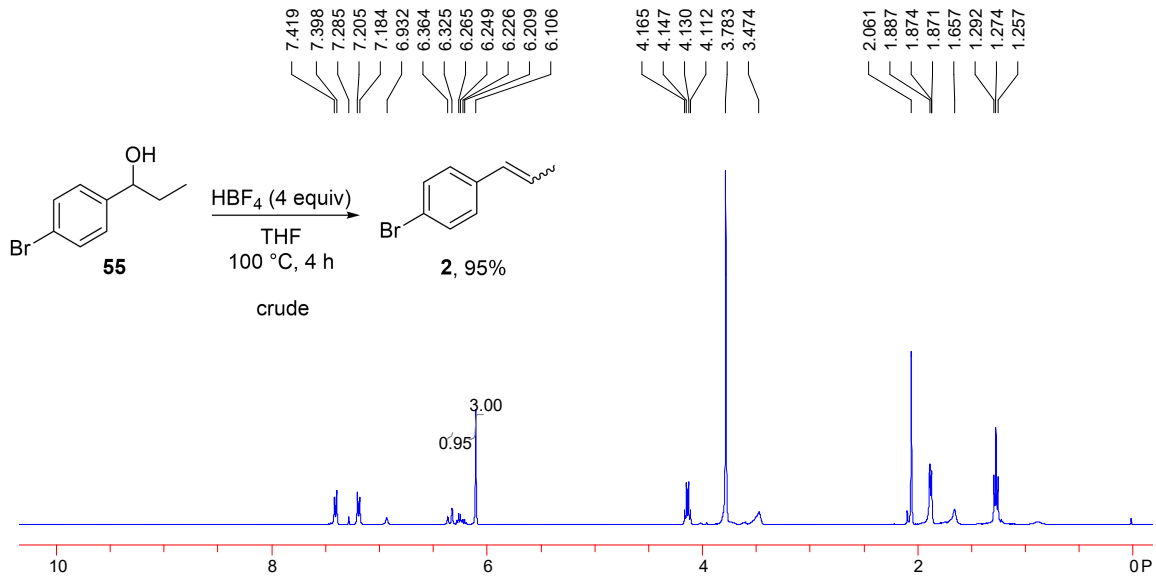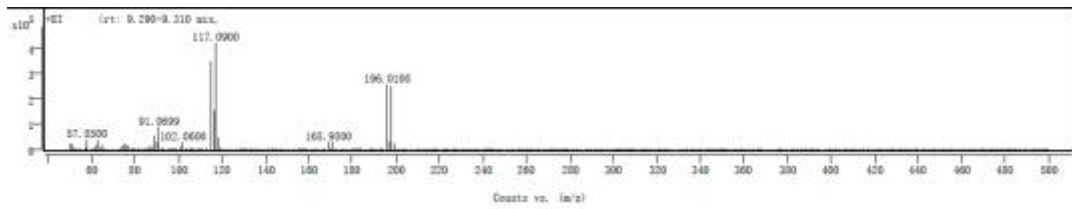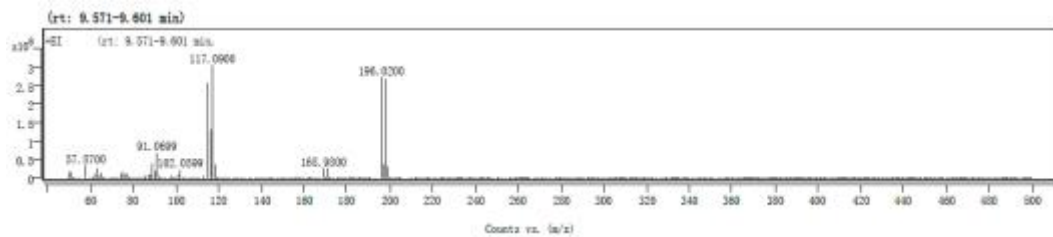

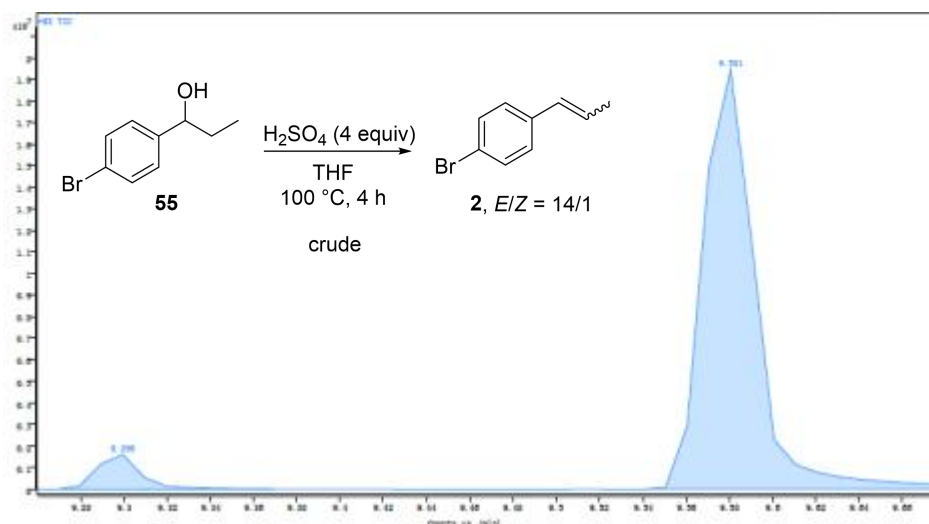

| RT    | Areas    | Areas% |
|-------|----------|--------|
| 9.581 | 33234851 | 14     |
| 9.299 | 2322319  | 1      |

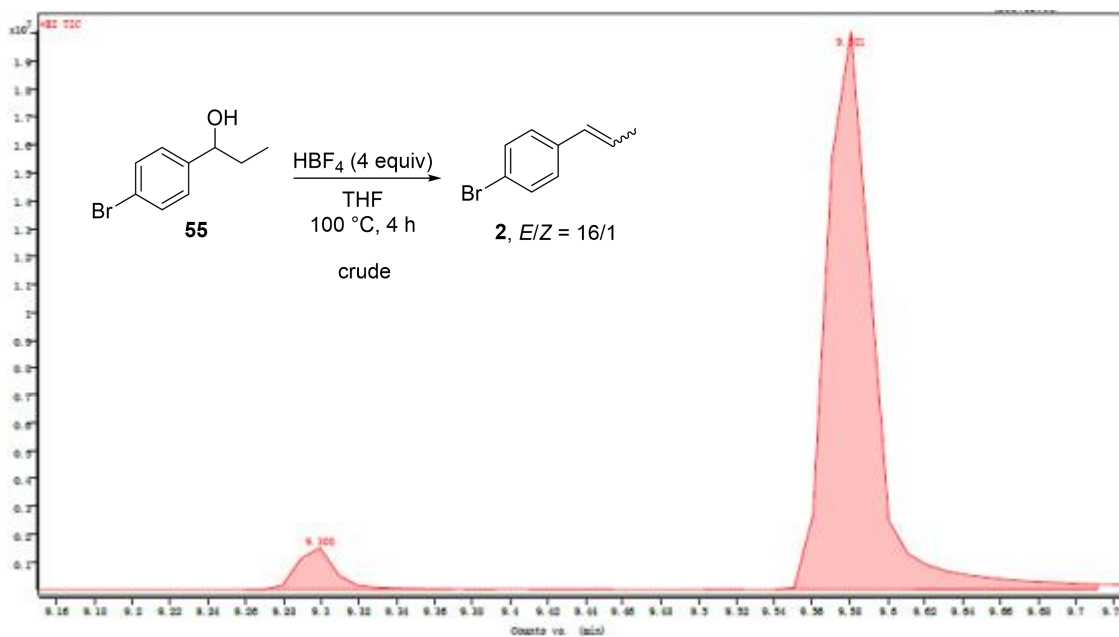

| RT    | Areas    | Areas% |
|-------|----------|--------|
| 9.581 | 34514349 | 16     |
| 9.300 | 2164717  | 1      |

**Figure S3.** The crude  $^1\text{H}$  NMR and GC spectra of the above reactions of **55**.

## 8.2 Elimination of acetate

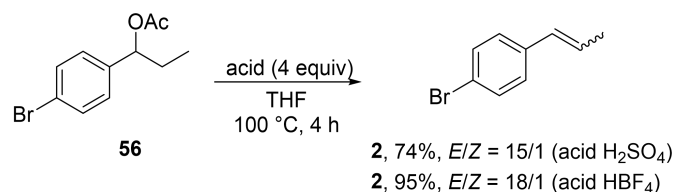

To an oven-dried round bottom flask was added 1-(4-bromophenyl)propyl acetate **56** (26 mg, 0.1 mmol), acid (0.4 mmol) and THF (0.5 mL) at room temperature. The resultant mixture was warmed to 100 °C and stirred for 4 h. After being cooled to room temperature, the resulting mixture was concentrated under reduced pressure and analyzed by <sup>1</sup>H NMR in CDCl<sub>3</sub>. Yield of **2** was determined by <sup>1</sup>H NMR analysis using 1,3,5-trimethoxybenzene (0.1 mmol) as the internal standard. The ratio of *E/Z* of **2** was determined by GC analysis (Figure S4).

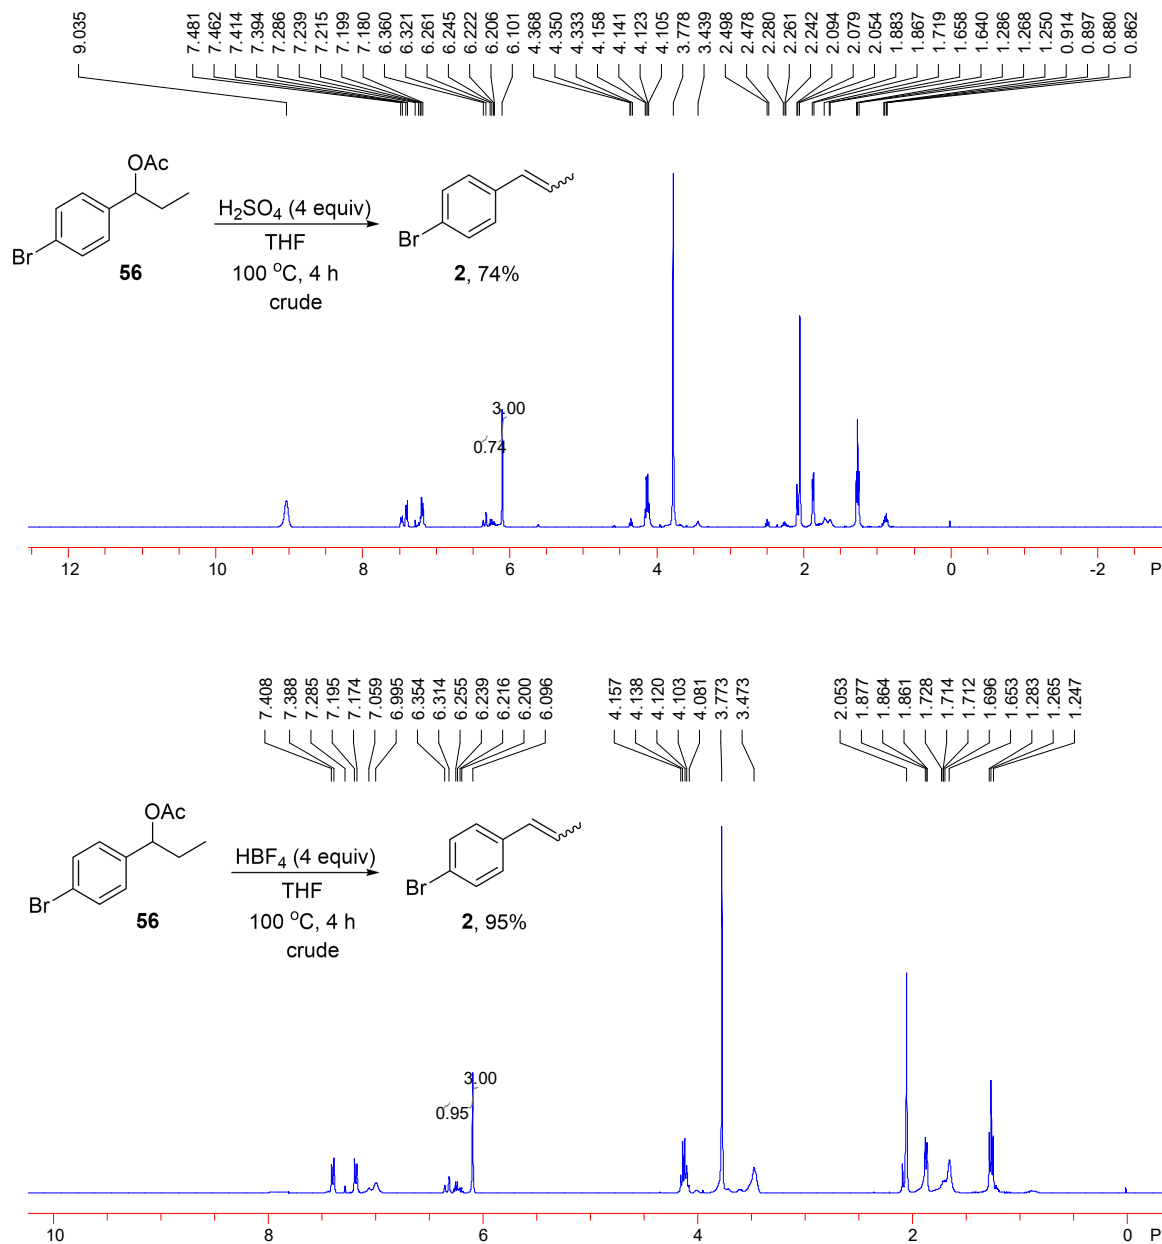

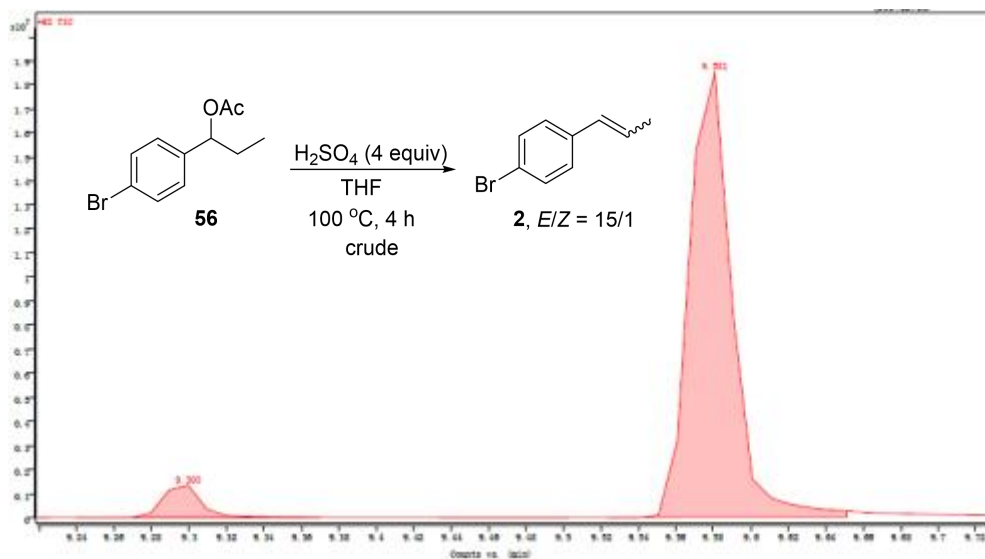

| RT    | Areas    | Areas% |
|-------|----------|--------|
| 9.581 | 29470497 | 15     |
| 9.300 | 1963967  | 1      |

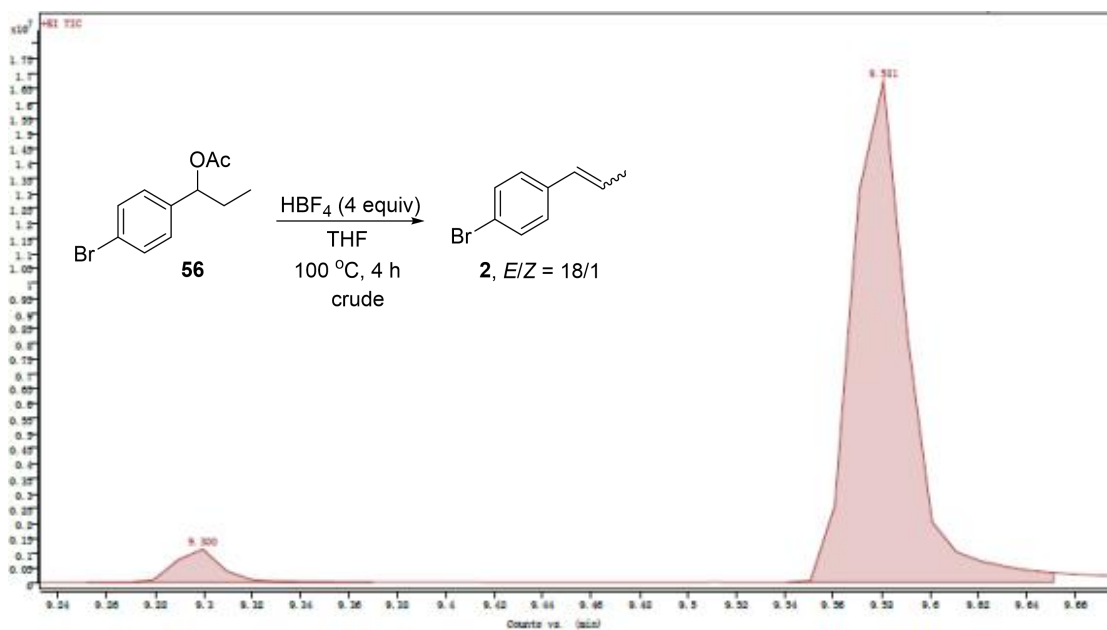

| RT    | Areas    | Areas% |
|-------|----------|--------|
| 9.581 | 27346906 | 18     |
| 9.300 | 1559689  | 1      |

**Figure S4.** The crude  $^1\text{H}$  NMR and GC spectra of the above reactions of **56**.

### 8.3 Probing trifluoroacetic ester as intermediate

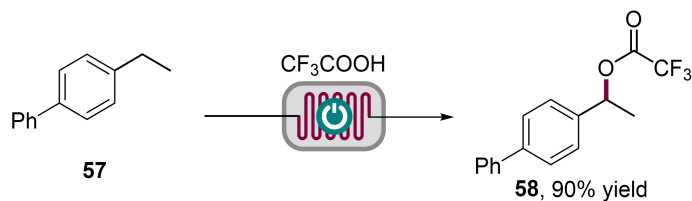

The procedure is the same as the **General Procedure A** but without subsequent reaction with  $\text{HBF}_4$ . 6 mL of the outlet solution was collected and concentrated under reduced pressure. The residue was diluted with  $\text{H}_2\text{O}$  and extracted with  $\text{CH}_2\text{Cl}_2$ . The organic phase was concentrated under reduced pressure. The residue was purified by silica gel column chromatography to give **58** (95 mg, 90% yield) as a white solid (Figure S5).

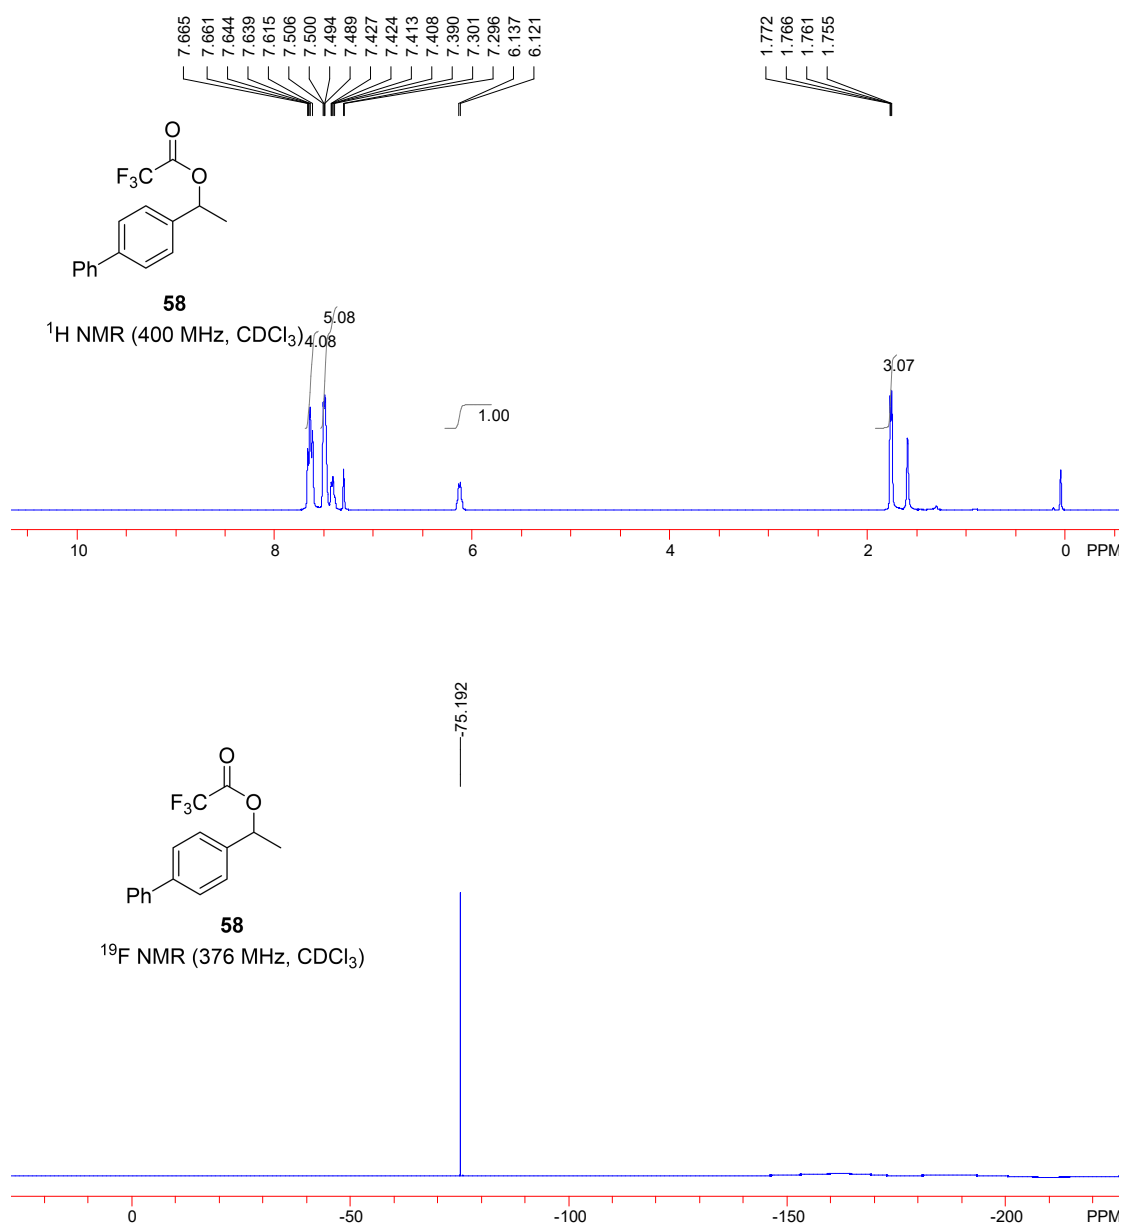

**Figure S5.** The  $^1\text{H NMR}$  and  $^{19}\text{F NMR}$  spectra of **58**.

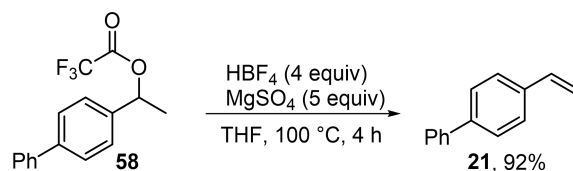

To a sealed tube was added 1-([1,1'-biphenyl]-4-yl)ethyl 2,2,2-trifluoroacetate **58** (29 mg, 0.12 mmol), HBF<sub>4</sub> (130 μL, 0.48 mmol, 50% w/w), MgSO<sub>4</sub> (72 mg, 0.6 mmol) and THF (2 mL) at room temperature. The mixture was warmed to 100 °C and stirred for 4 h. After being cooled to room temperature, the reaction mixture was diluted with H<sub>2</sub>O and extracted twice with EtOAc. The combined organic phase was concentrated under reduced pressure. The residue was chromatographed through silica gel eluting with ethyl acetate/petroleum ether to give **21** (20 mg, yield = 92%).

#### 8.4 Kinetic isotope effect experiments

To a sealed tube was added 1-([1,1'-biphenyl]-4-yl)ethyl 2,2,2-trifluoroacetate **58** (24 mg, 0.082 mmol), **58-d** (48 mg, 0.158 mmol, D%, 77%), HBF<sub>4</sub>·Et<sub>2</sub>O (260 μL, 0.96 mmol, 50%), MgSO<sub>4</sub> (144 mg, 1.2 mmol) and THF (4 mL) at room temperature. The mixture was warmed to 100 °C and stirred for 15 min. After being cooled to room temperature, the reaction mixture was diluted with H<sub>2</sub>O and extracted twice with EtOAc. The combined organic phase was concentrated under reduced pressure. The residue was chromatographed through silica gel eluting with ethyl acetate/petroleum ether to give **21/21-d** (8 mg, yield = 19%). Product **21/21-d** was analyzed by <sup>1</sup>H NMR in CDCl<sub>3</sub>. A kinetic isotope effect (KIE = 1.5) was obtained (Figure S6).

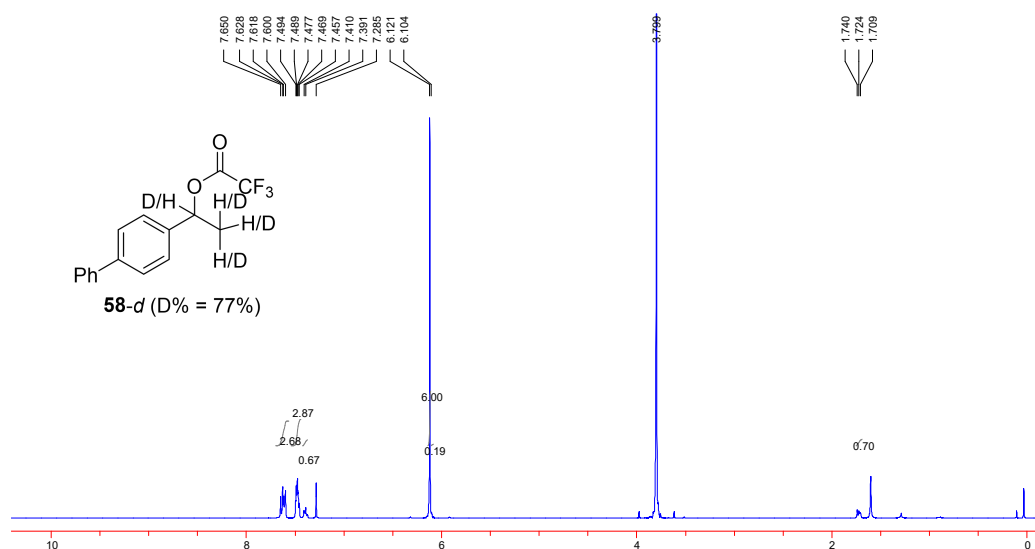



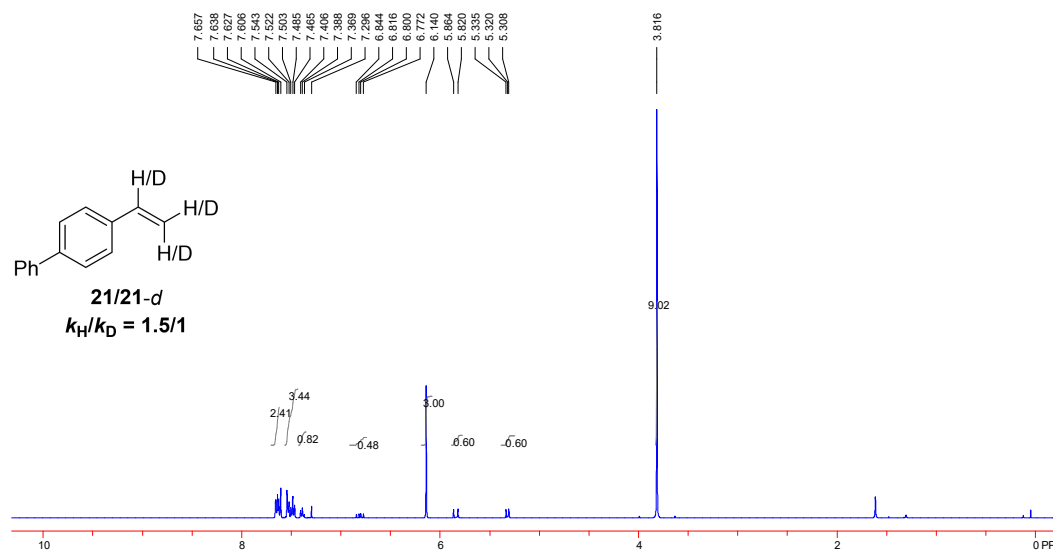

**Figure S6.** The  $^1\text{H}$  NMR spectra of **58-d** and **21/21-d**.

## 9. Limitations

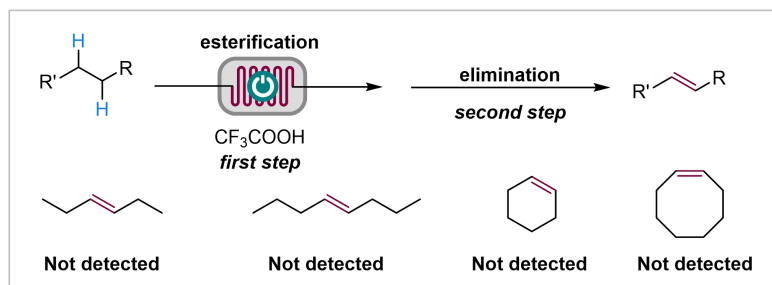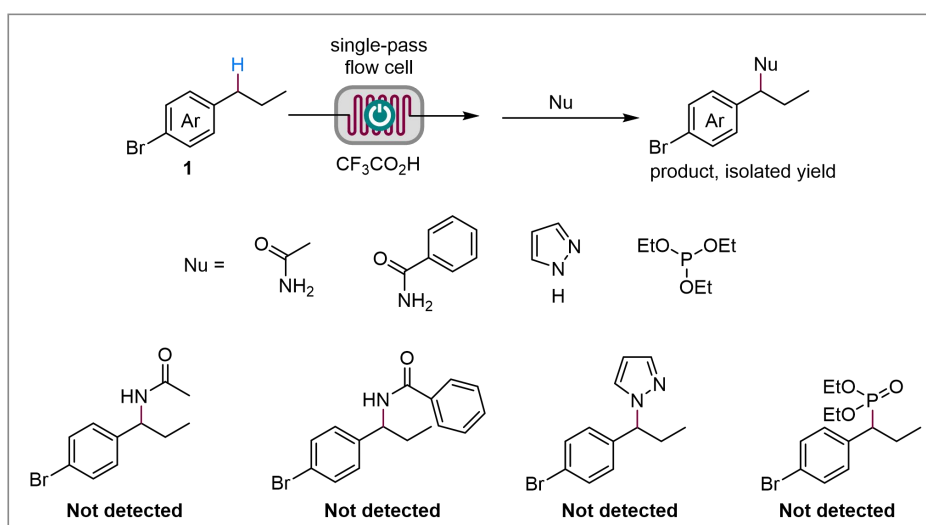

## 10. References

1. I. Colomer, C. Batchelor-McAuley, B. Odell, T. J. Donohoe and R. G. Compton, *J. Am. Chem. Soc.*, 2016, **138**, 8855-8861.
2. T. Song, S. Arseniyadis and J. Cossy, *Org. Lett.*, 2019, **21**, 603-607.
3. J. He, Z. Jia, H. Tan, X. Luo, D. Qiu, J. Shi, H. Xu and Y. Li, *Angew. Chem. Int. Ed.*, 2019, **58**, 18513-18518.
4. W. Zhao, S. Meier, S. Yang and A. Riisager, *Green Chem.*, 2020, **22**, 5972-5977.
5. K. Mizutani, H. Shinokubo and K. Oshima, *Org. Lett.*, 2003, **5**, 3959-3961.
6. Z. Yang, R. K. Kumar, P. Liao, Z. Liu, X. Li and X. Bi, *Chem. Commun.*, 2016, **52**, 5936-5939.
7. M. Rehman, S. Surendran, N. Siddavatam and G. Rajendar, *Org. Biomol. Chem.*, 2022, **20**, 329-333.
8. A. Yanagisawa, T. Nezu and S.-i. Mohri, *Org. Lett.*, 2009, **11**, 5286-5289.
9. H. Fuse, M. Kojima, H. Mitsunuma and M. Kanai, *Org. Lett.*, 2018, **20**, 2042-2045.
10. A. Sokolov, S. Golovach, I. Kozlinsky, K. Dolia, A. A. Tolmachev, Y. Kuchkovska and O. O. Grygorenko, *Synthesis*, 2019, **51**, 848-858.
11. M.-J. Zhou, L. Zhang, G. Liu, C. Xu and Z. Huang, *J. Am. Chem. Soc.*, 2021, **143**, 16470-16485.
12. J. J. Molloy, C. P. Seath, M. J. West, C. McLaughlin, N. J. Fazakerley, A. R. Kennedy, D. J. Nelson and A. J. B. Watson, *J. Am. Chem. Soc.*, 2018, **140**, 126-130.
13. F. C. Demidoff, E. J. P. Rodrigues Filho, A. L. F. de Souza, C. D. Netto and L. L. de Carvalho, *Synthesis*, 2021, **53**, 4097-4109.
14. K. Kiyokawa, I. Noguchi, T. Nagata and S. Minakata, *Org. Lett.*, 2023, **25**, 2537-2542.
15. K. Kiyokawa, M. Ishizuka and S. Minakata, *Angew. Chem. Int. Ed.*, 2023, **62**, e202218743.
16. T. V. Nguyen and A. Bekensir, *Org. Lett.*, 2014, **16**, 1720-1723.
17. J. Kim, J. Jang, Y. Lee and K. Shin, *Org. Lett.*, 2022, **24**, 5412-5416.
18. J. Huang, G. Hu, S. An, D. Chen, M. Li and P. Li, *J. Org. Chem.*, 2019, **84**, 9758-9769.
19. M. B. Larsen, J. D. Van Horn, F. Wu and M. A. Hillmyer, *Macromolecules*, 2017, **50**, 4363-4371.
20. A. Moriconi, M. C. Cesta, M. N. Cervellera, A. Aramini, S. Coniglio, S. Colagioia, A. R. Beccari, C. Bizzarri, M. R. Cavicchia, M. Locati, E. Galliera, P. Di Benedetto, P. Vigilante, R. Bertini and M. Allegretti, *J. Med. Chem.*, 2007, **50**, 3984-4002.
21. Ritu, D. Kolb, N. Jain and B. König, *Adv. Synth. Catal.*, 2023, **365**, 605-611.
22. C. Huang, J. Li, J. Wang, Q. Zheng, Z. Li and T. Tu, *Sci. China Chem.*, 2021, **64**, 66-71.
23. S. M. C. S. Monteiro, A. J. D. Silvestre, A. M. S. Silva, J. A. S. Cavaleiro, V. Félix and M. G. B. Drew, *New J. Chem.*, 2001, **25**, 1091-1097.
24. J. Geiwiz and E. Haslinger, *Helv. Chim. Acta*, 1995, **78**, 818-832.
25. X.-Y. Dong, Y.-F. Zhang, C.-L. Ma, Q.-S. Gu, F.-L. Wang, Z.-L. Li, S.-P. Jiang and X.-Y. Liu, *Nat. Chem.*, 2019, **11**, 1158-1166.
26. X. Li, J.-N. Song, S. Karmakar, Y. Lu, Y. Lv, P. Liao and Z. Liu, *Chem. Commun.*, 2022, **58**, 13783-13786.
27. M. A. Lopez, J. A. Buss and S. S. Stahl, *Org. Lett.*, 2022, **24**, 597-601.
28. T.-S. Chen, H. Long, Y. Gao and H.-C. Xu, *Angew. Chem. Int. Ed.*, 2023, **62**, e202310138.
29. X. Ma and Z. Li, *Synlett*, 2021, **32**, 631-635.

## 11. NMR and GC Spectra

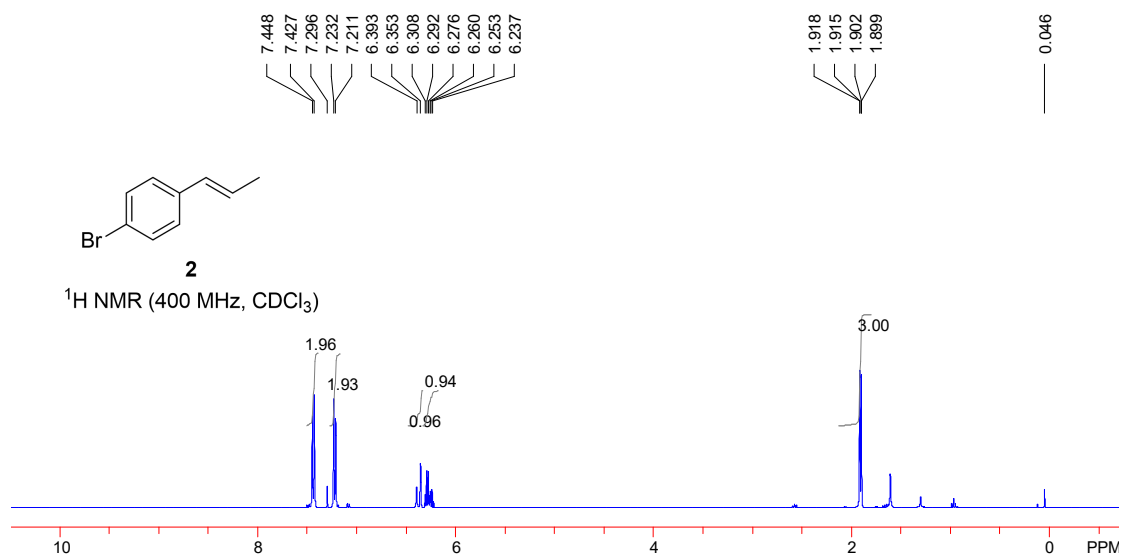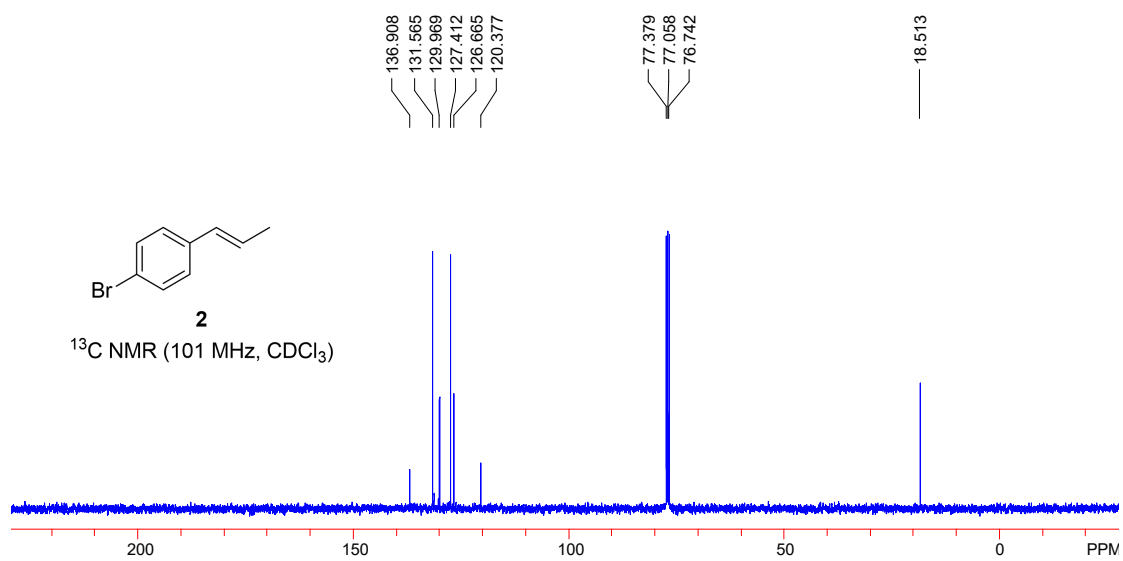

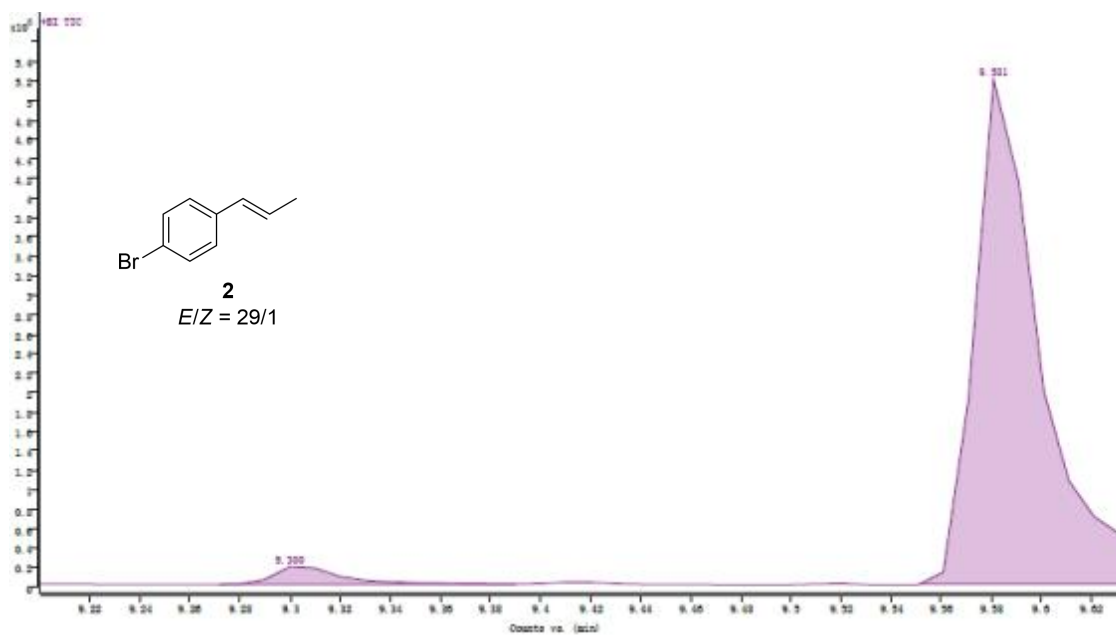

| RT    | Areas    | Areas% |
|-------|----------|--------|
| 9.581 | 10384986 | 29     |
| 9.300 | 352815   | 1      |

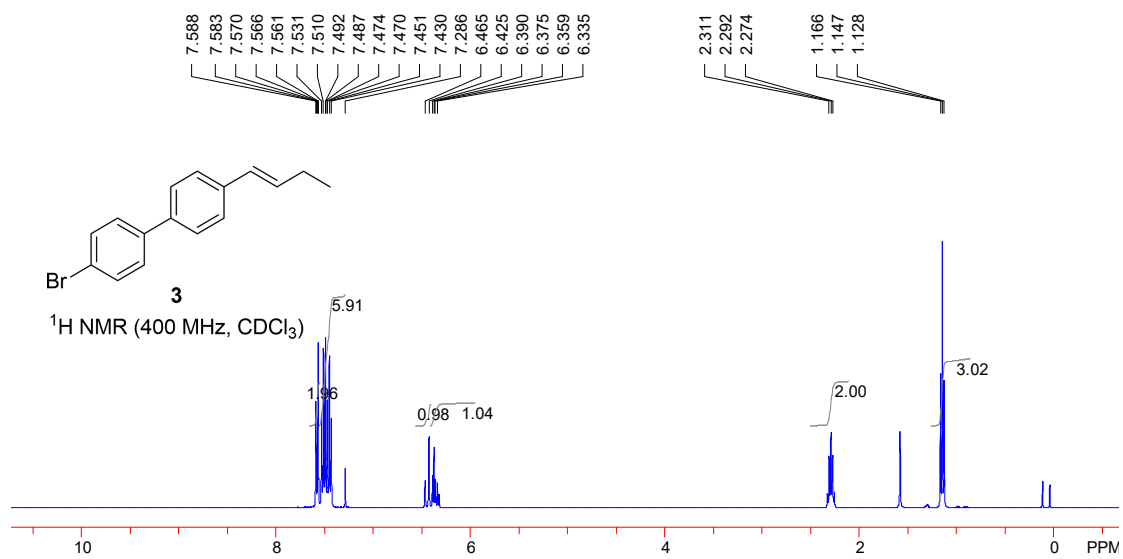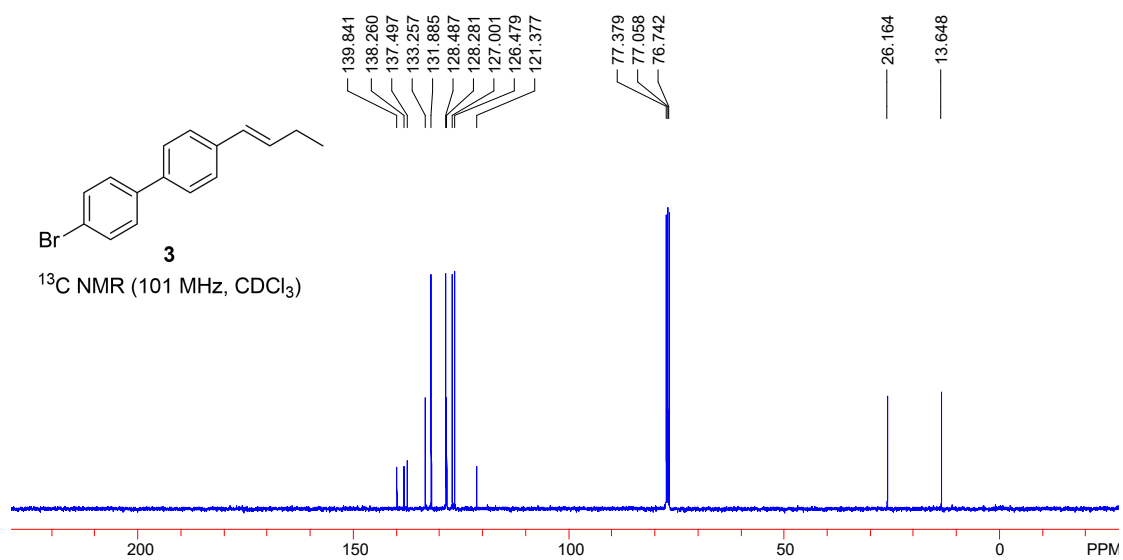

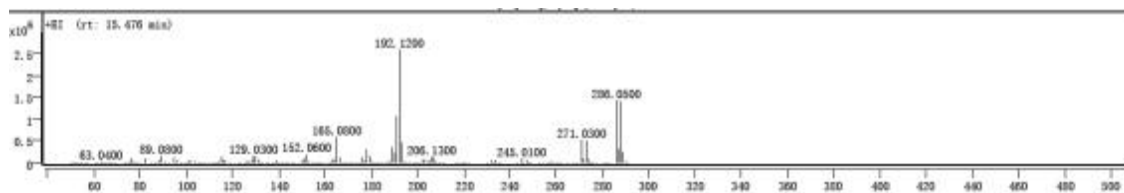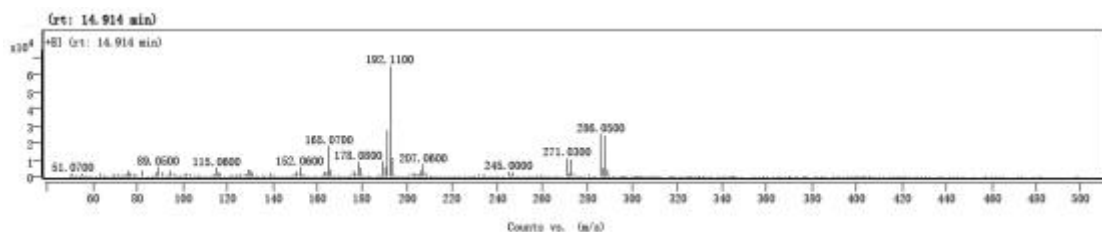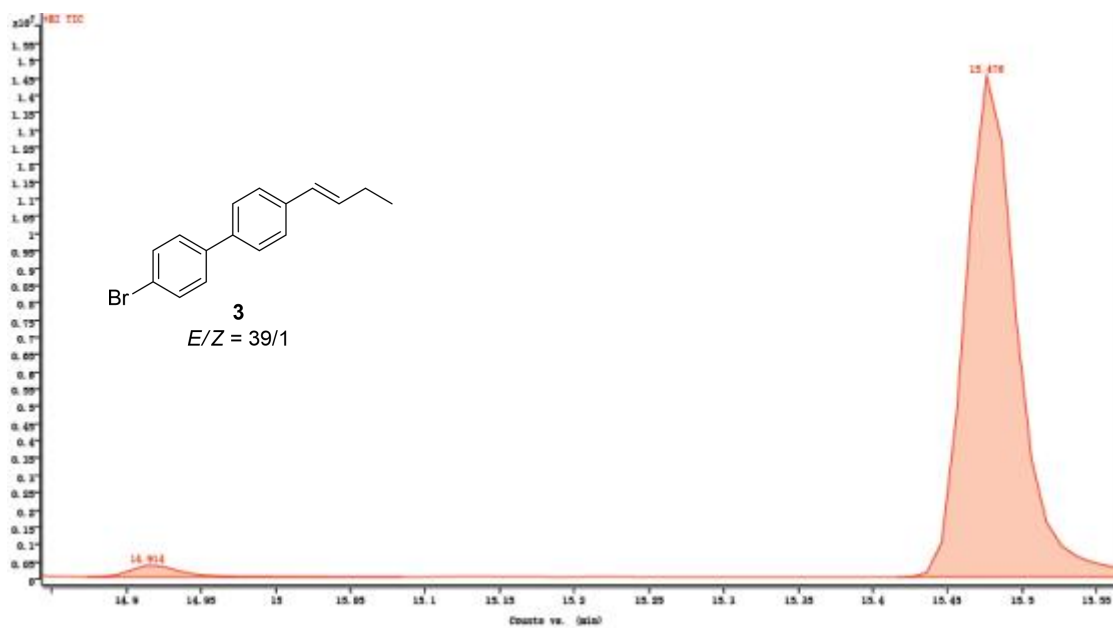

| RT     | Areas    | Areas% |
|--------|----------|--------|
| 15.476 | 35977155 | 39     |
| 14.914 | 929562   | 1      |

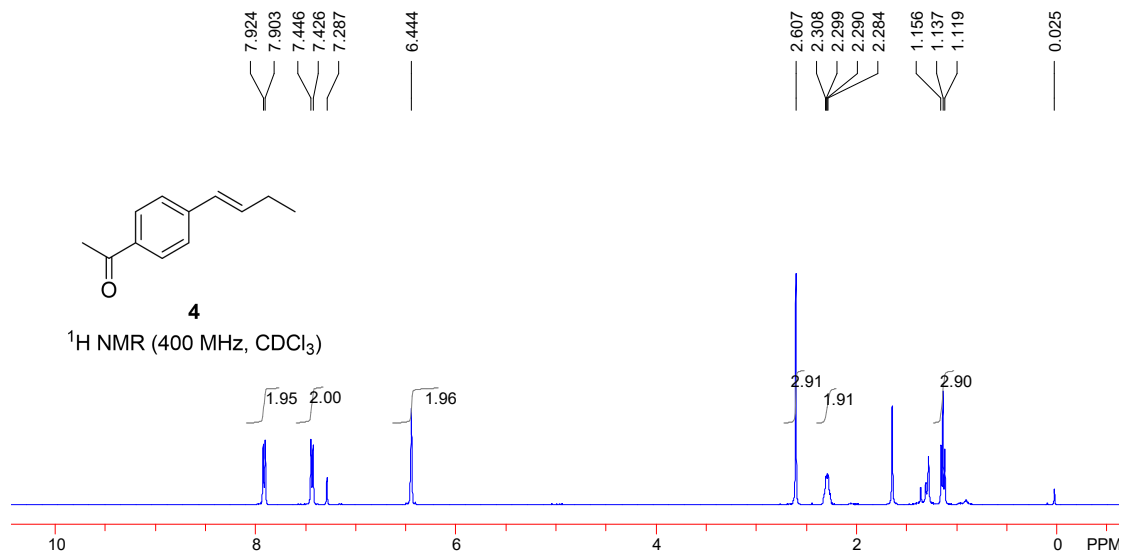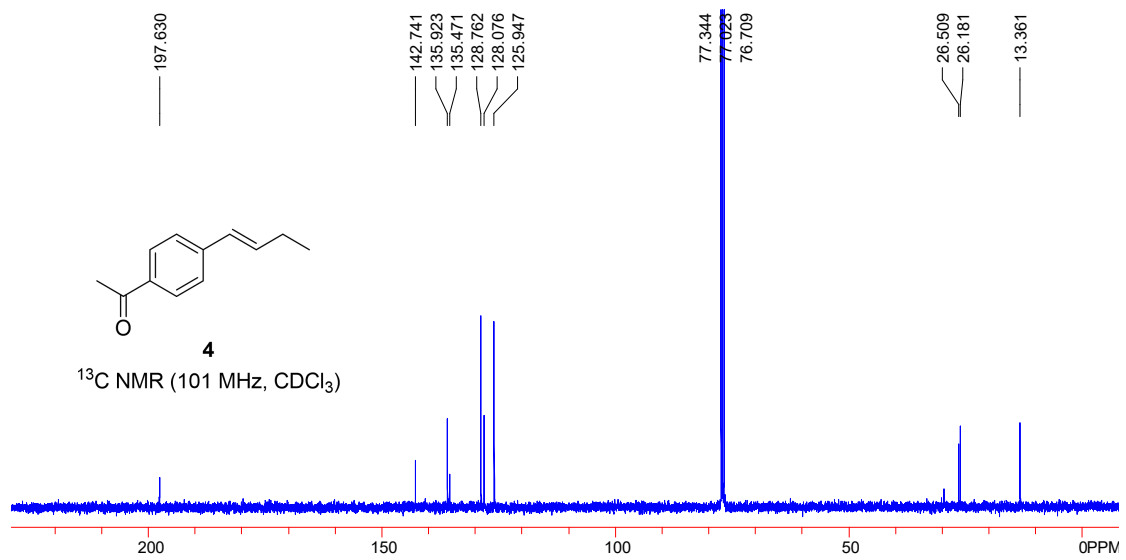



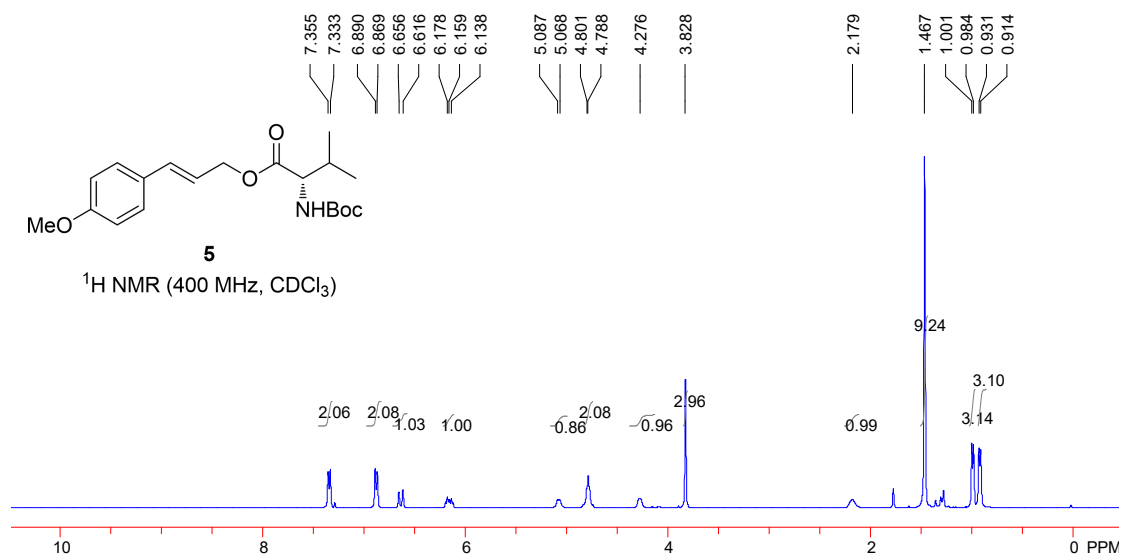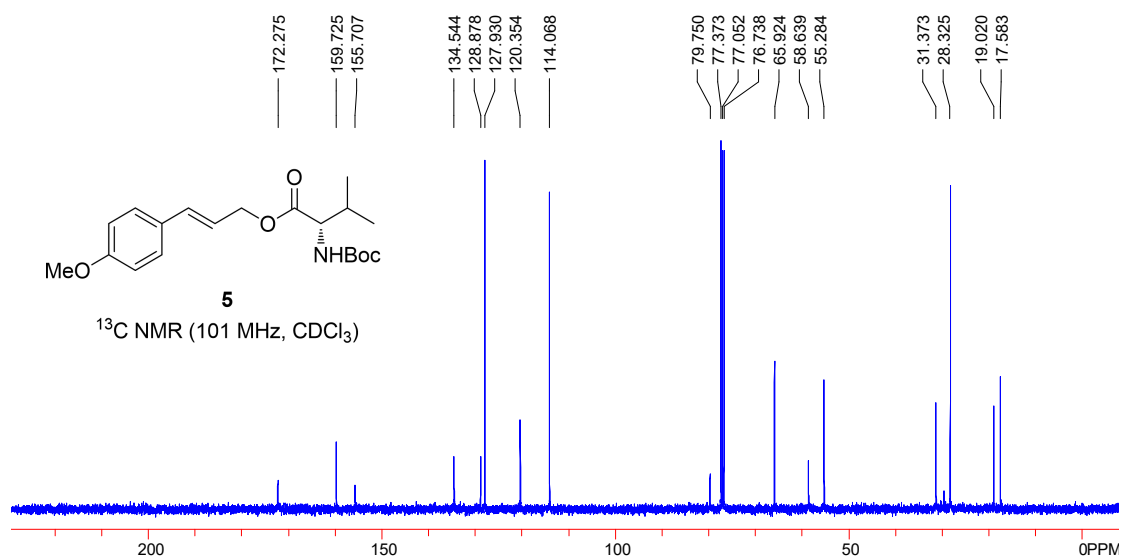

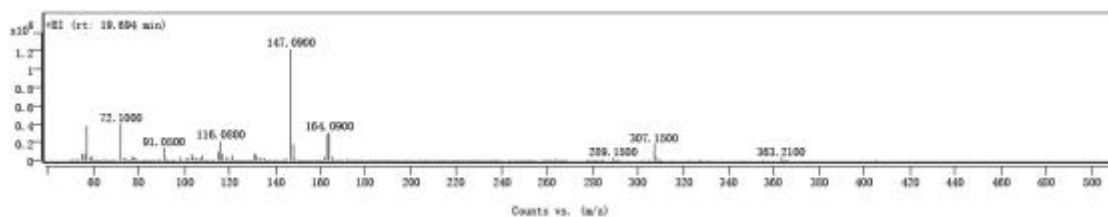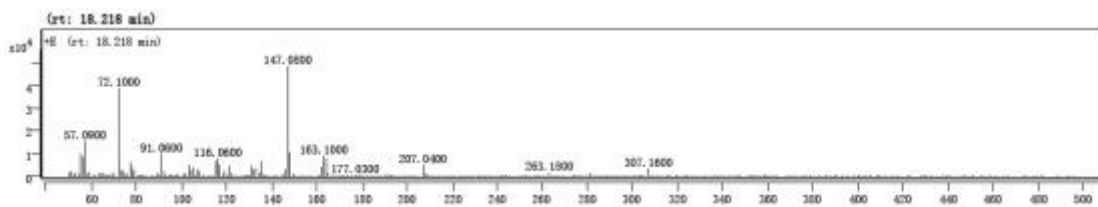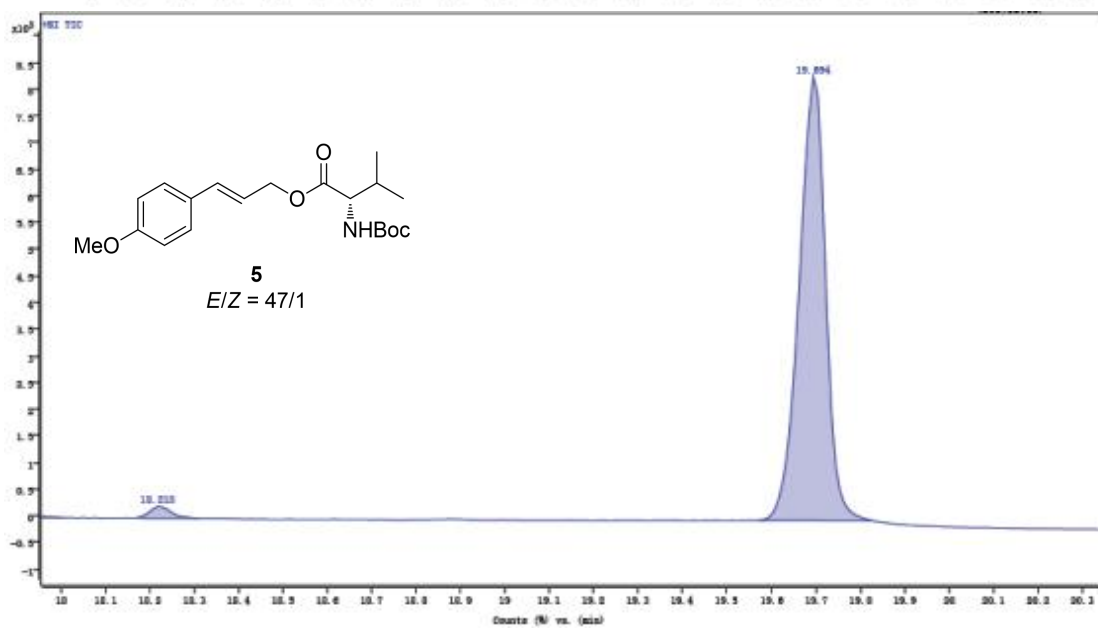

| RT     | Areas    | Areas% |
|--------|----------|--------|
| 19.694 | 19304184 | 47     |
| 18.218 | 411330   | 1      |

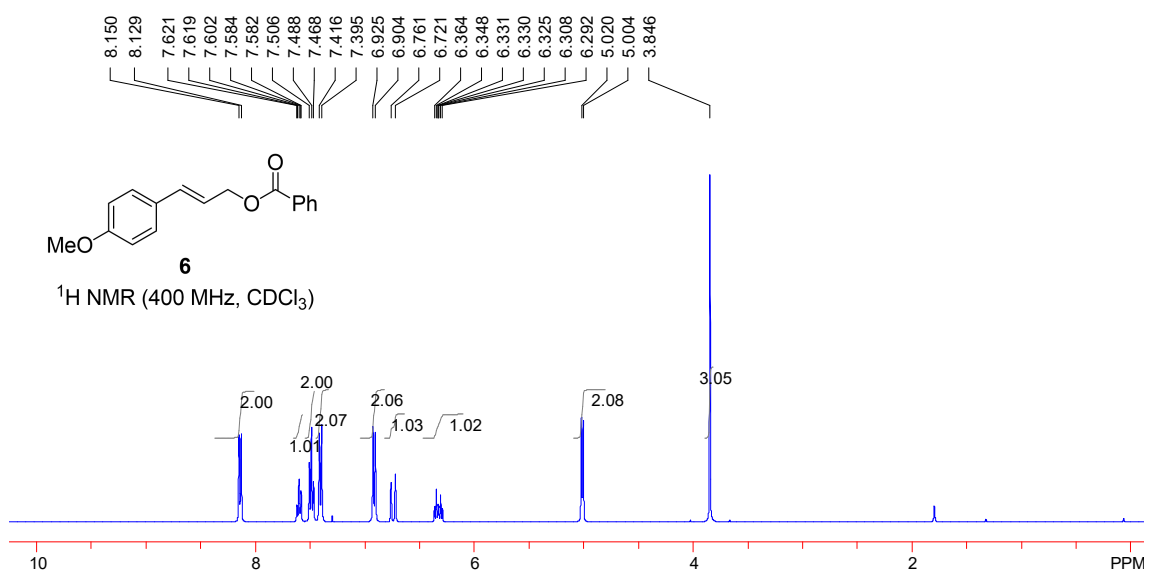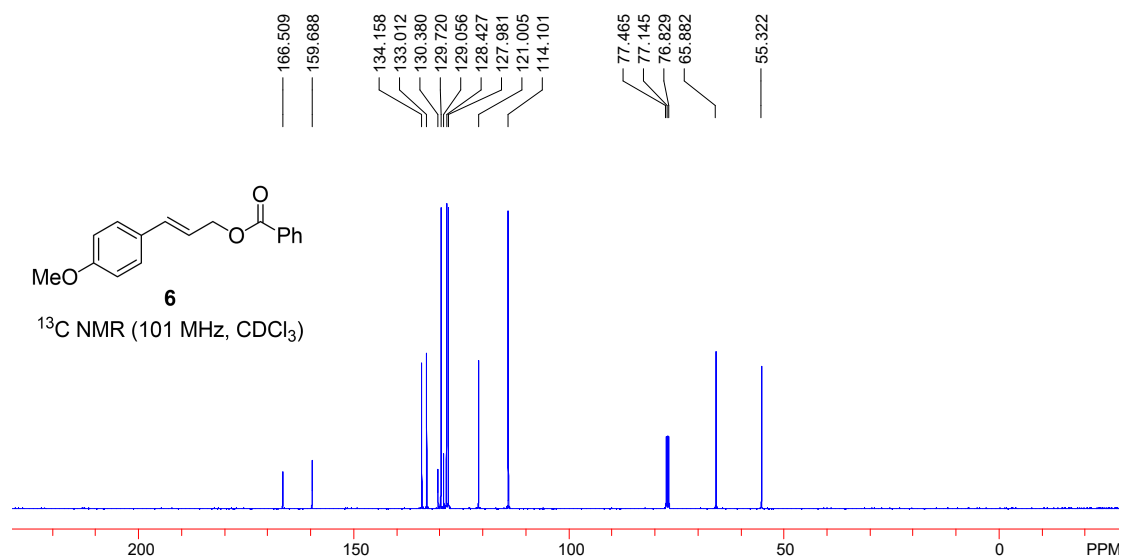

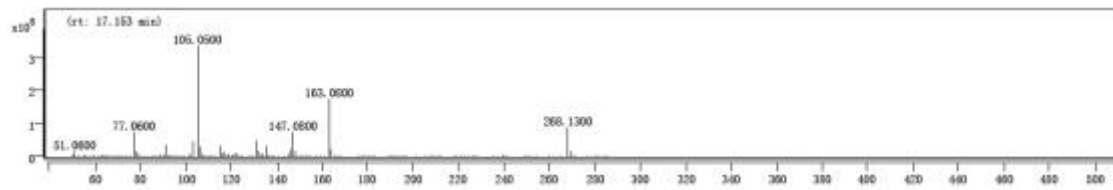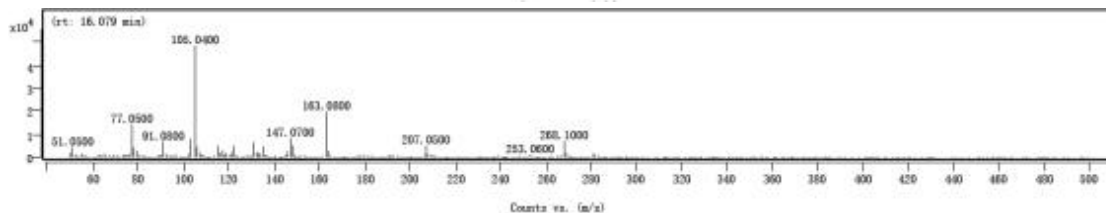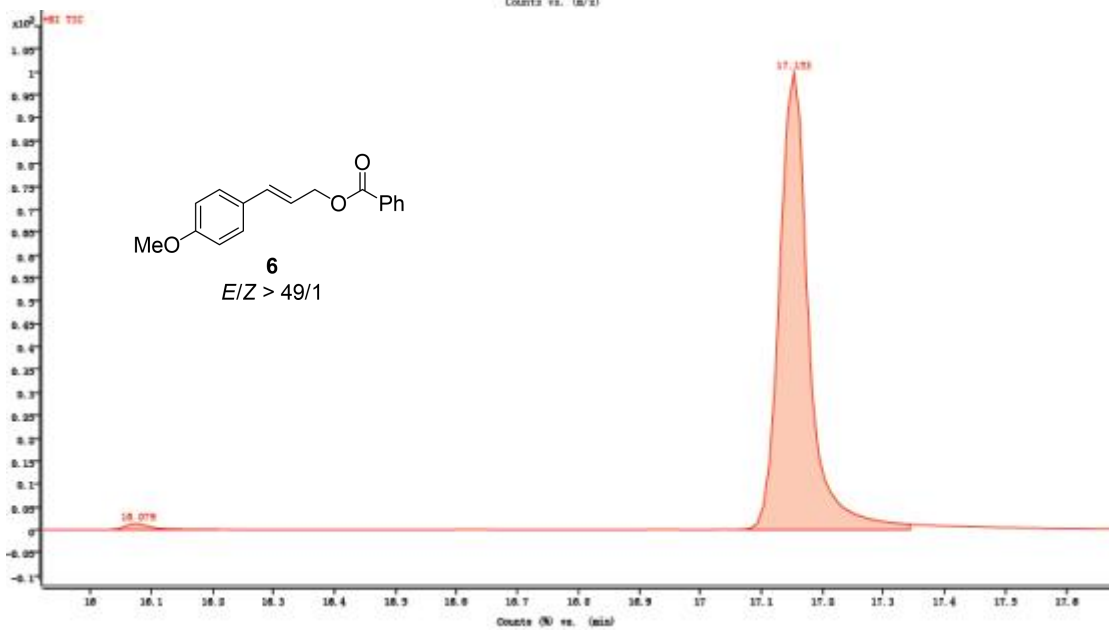

| RT     | Area     |
|--------|----------|
| 17.153 | 42030584 |
| 16.079 | 511498   |

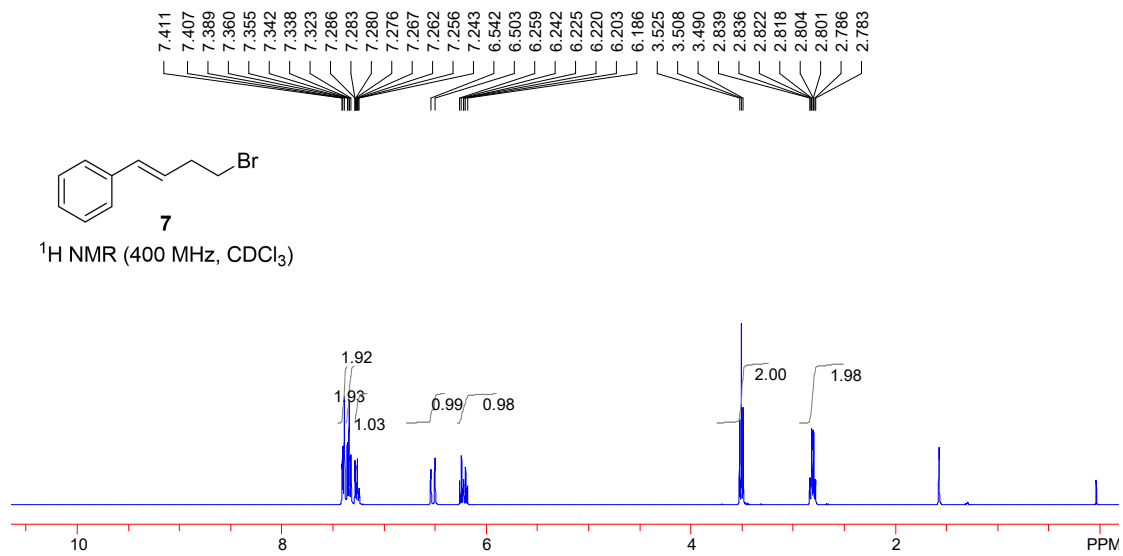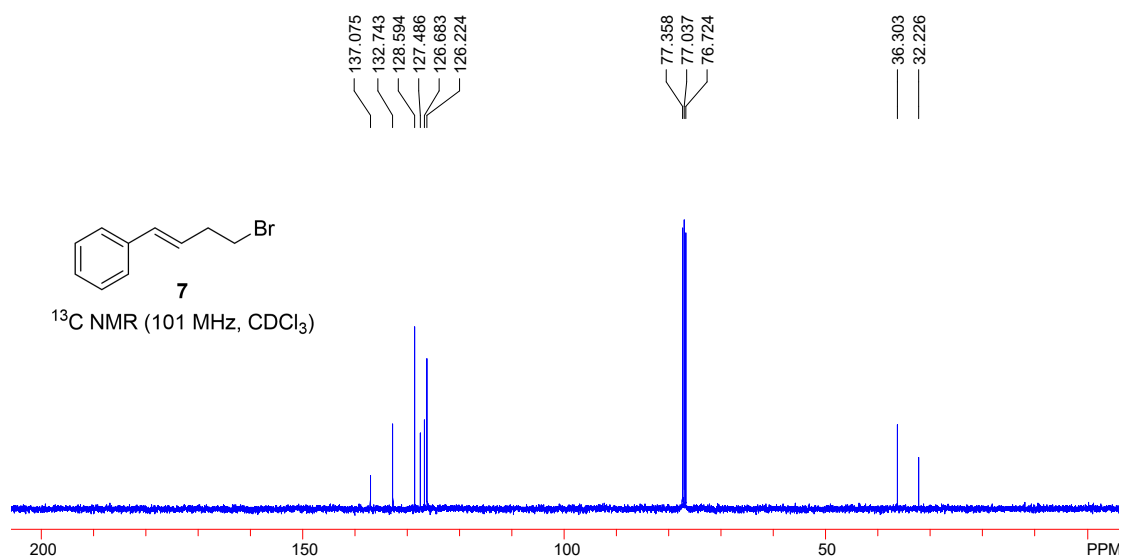

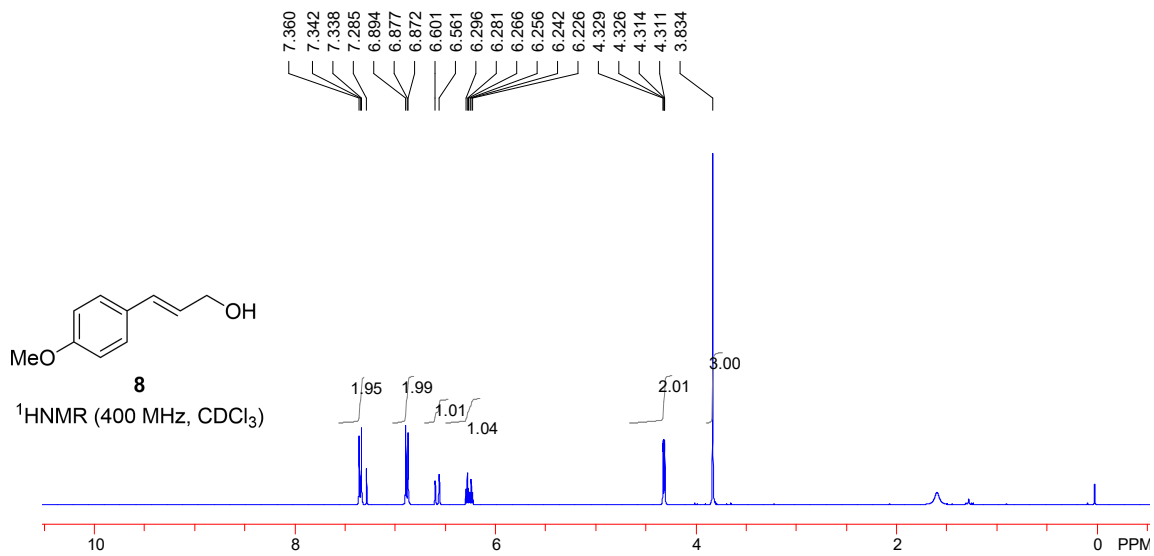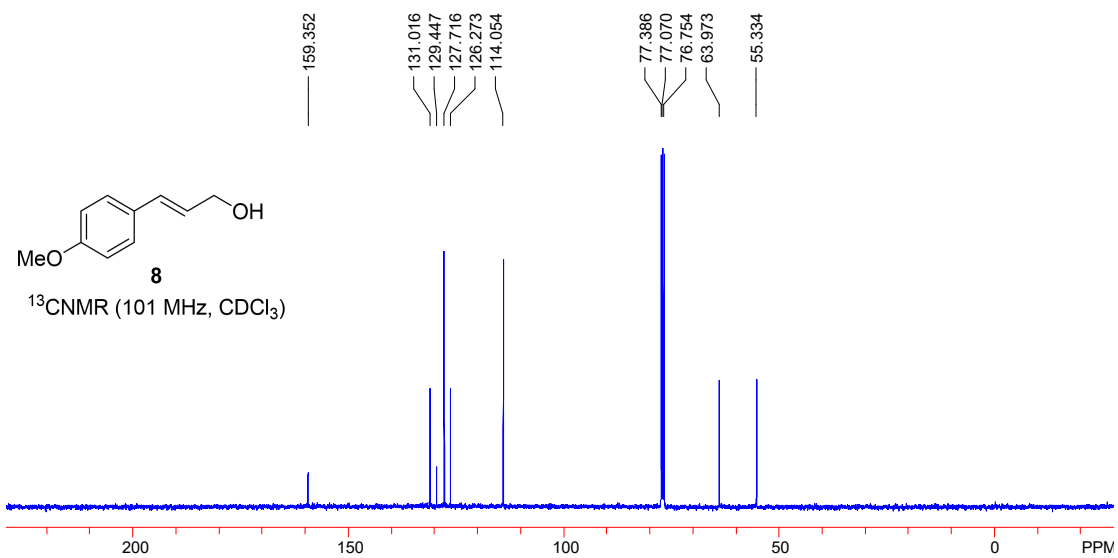

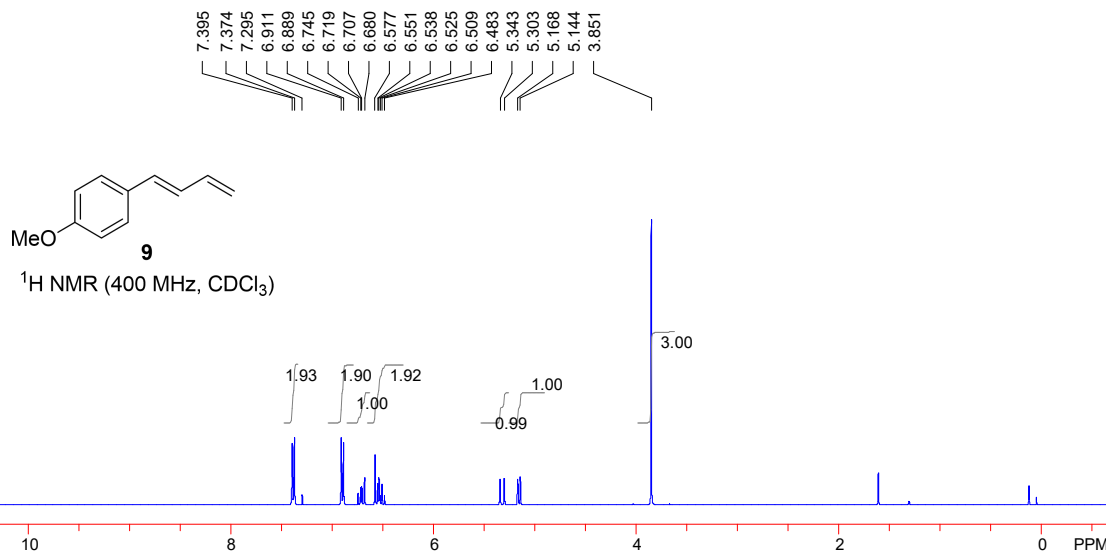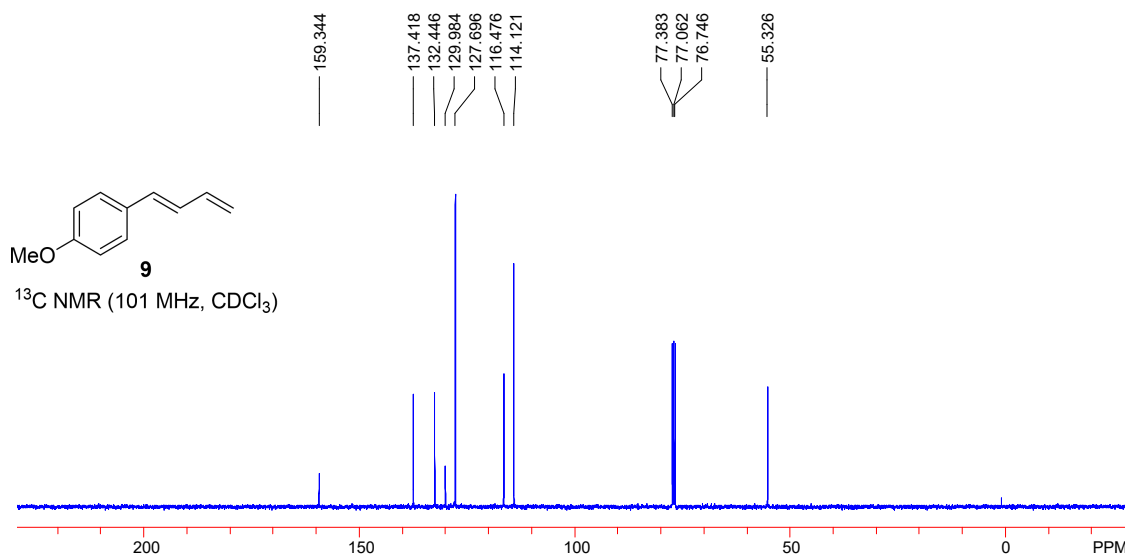

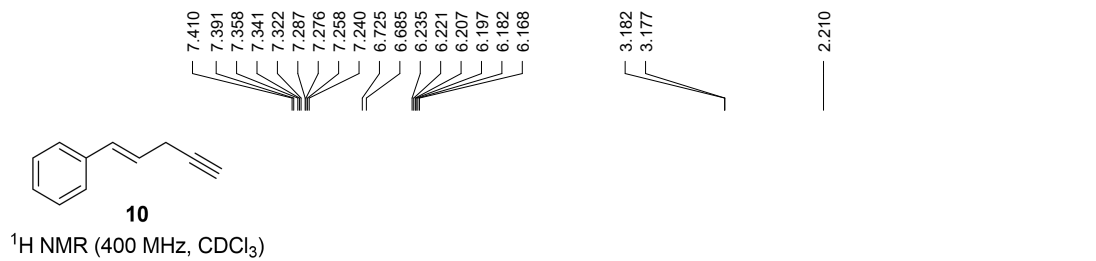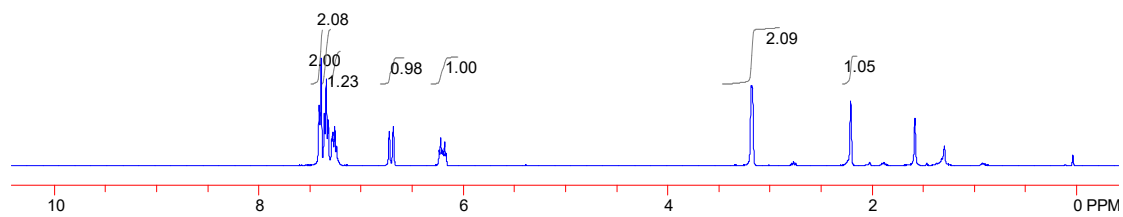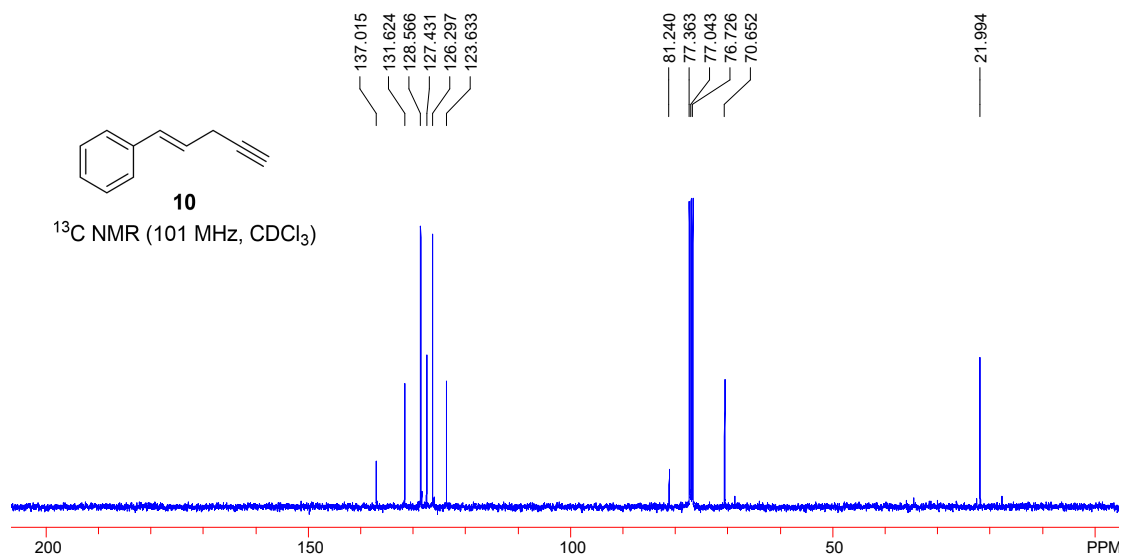



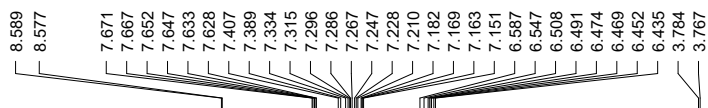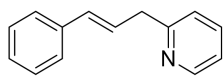

**11**

<sup>1</sup>H NMR (400 MHz, CDCl<sub>3</sub>)

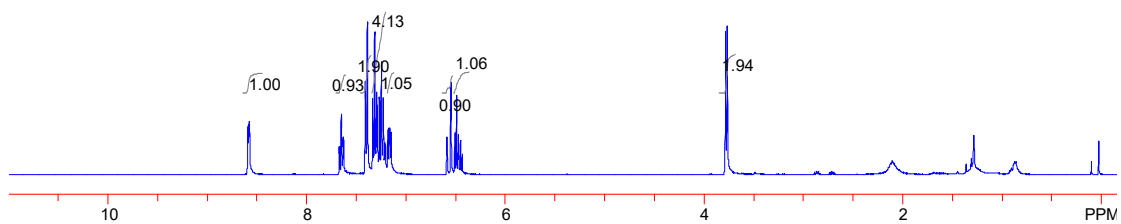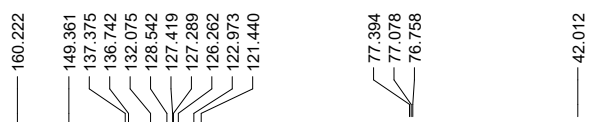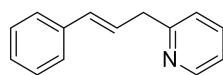

**11**

<sup>13</sup>C NMR (101 MHz, CDCl<sub>3</sub>)

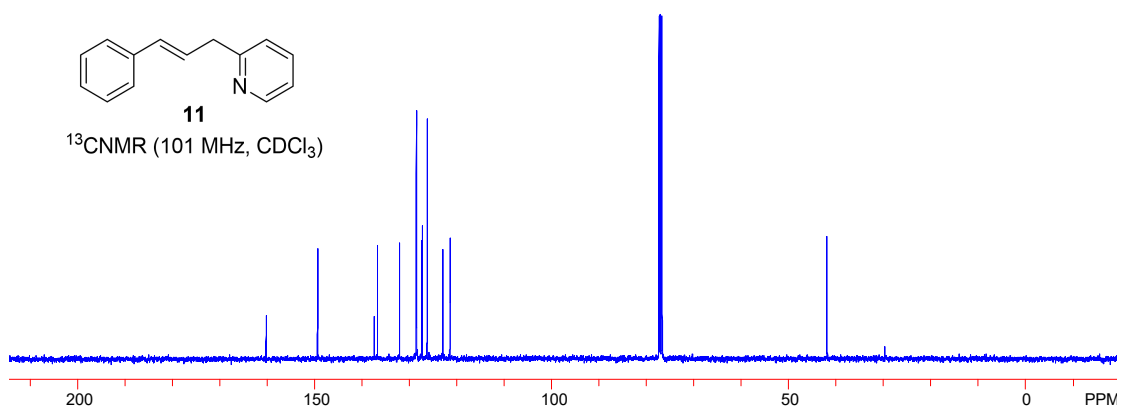

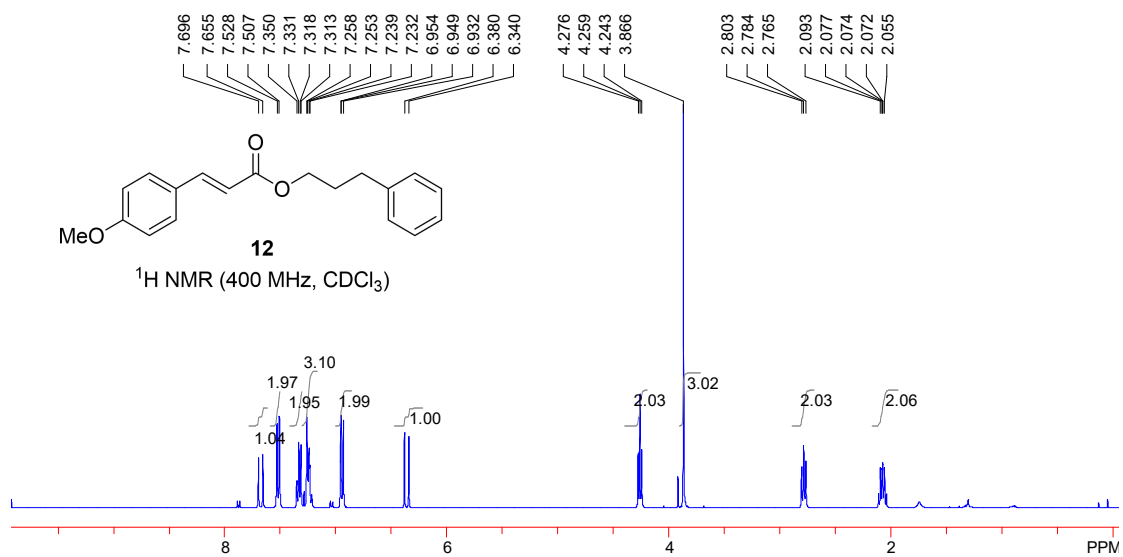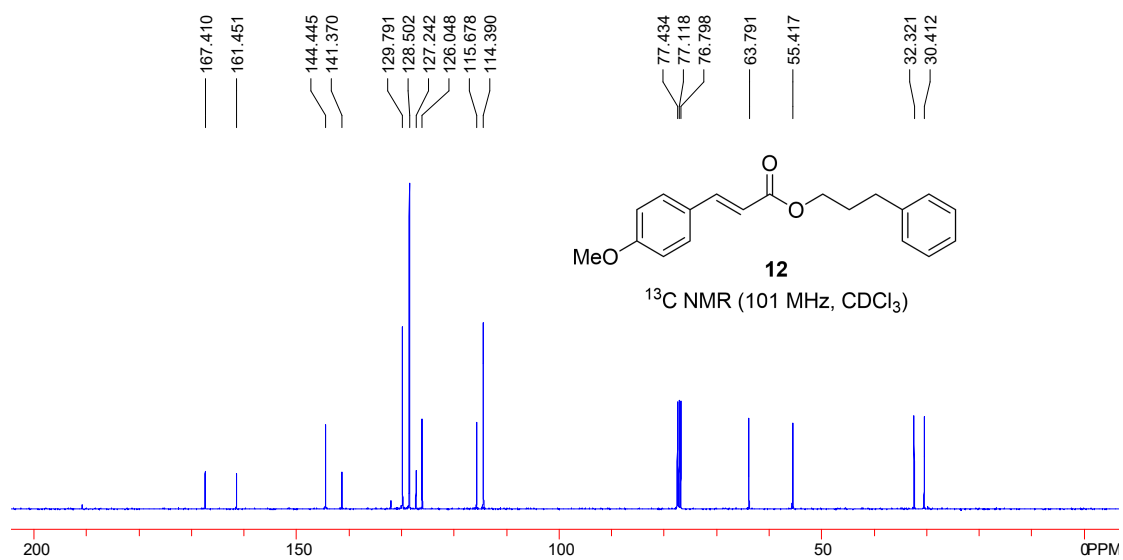

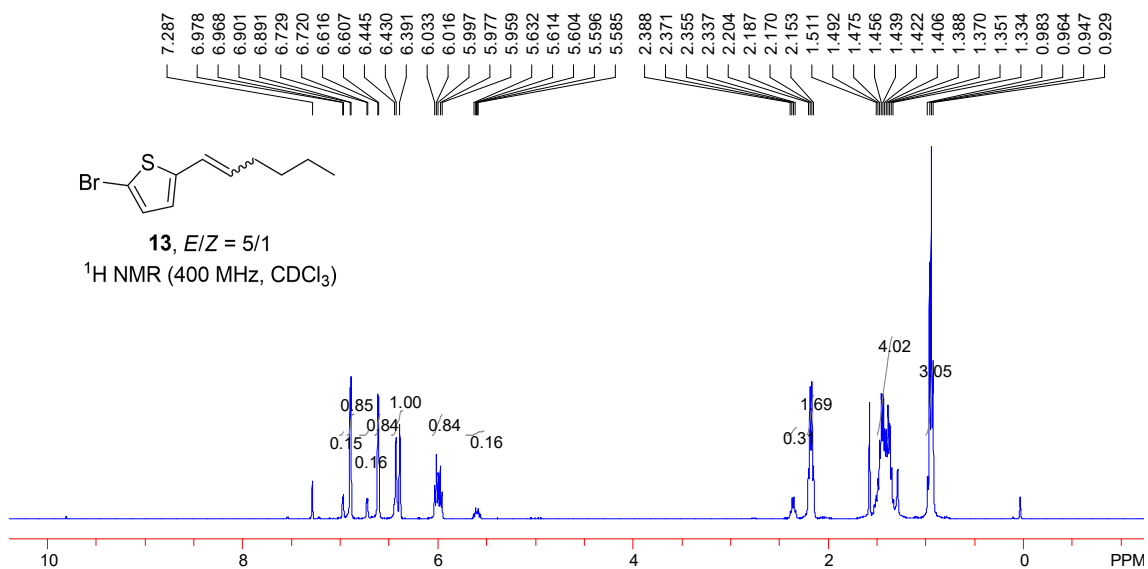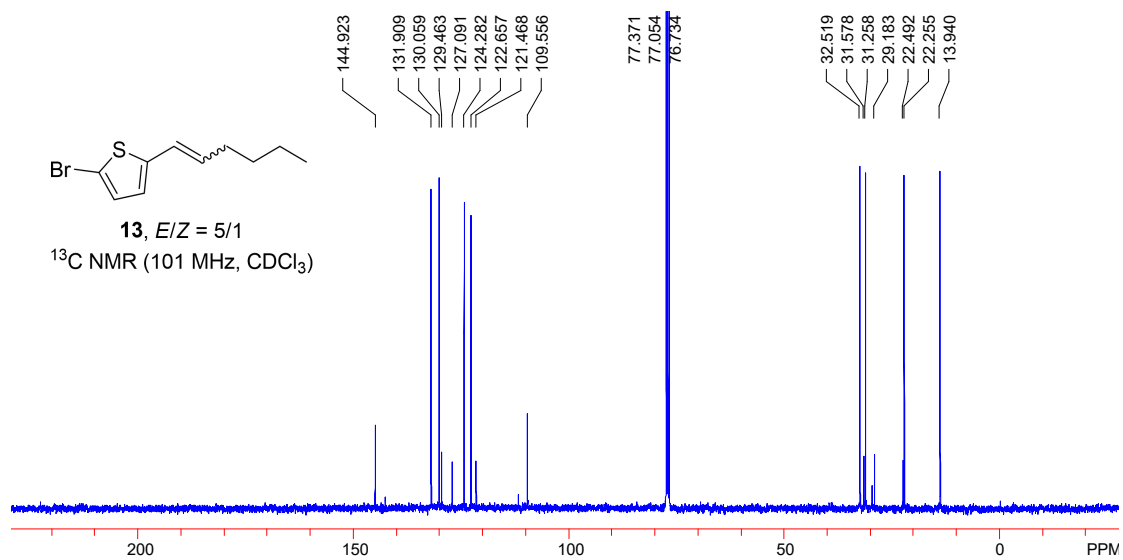

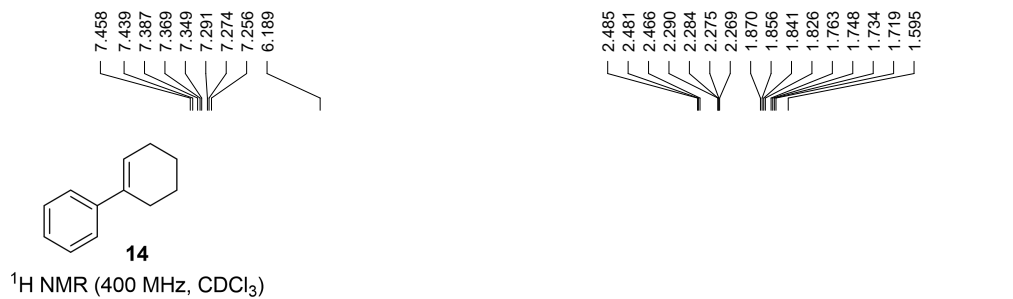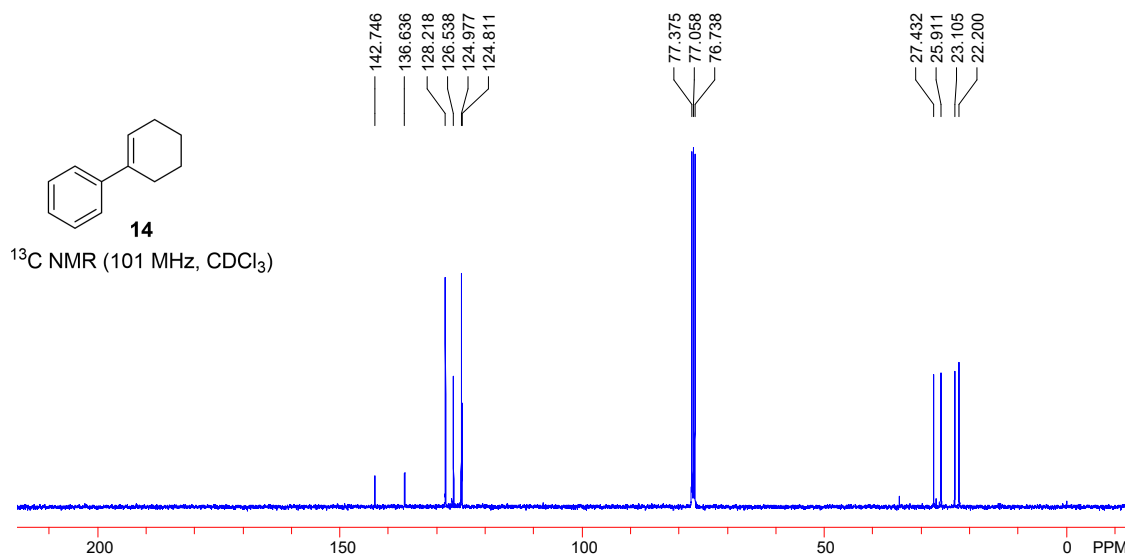

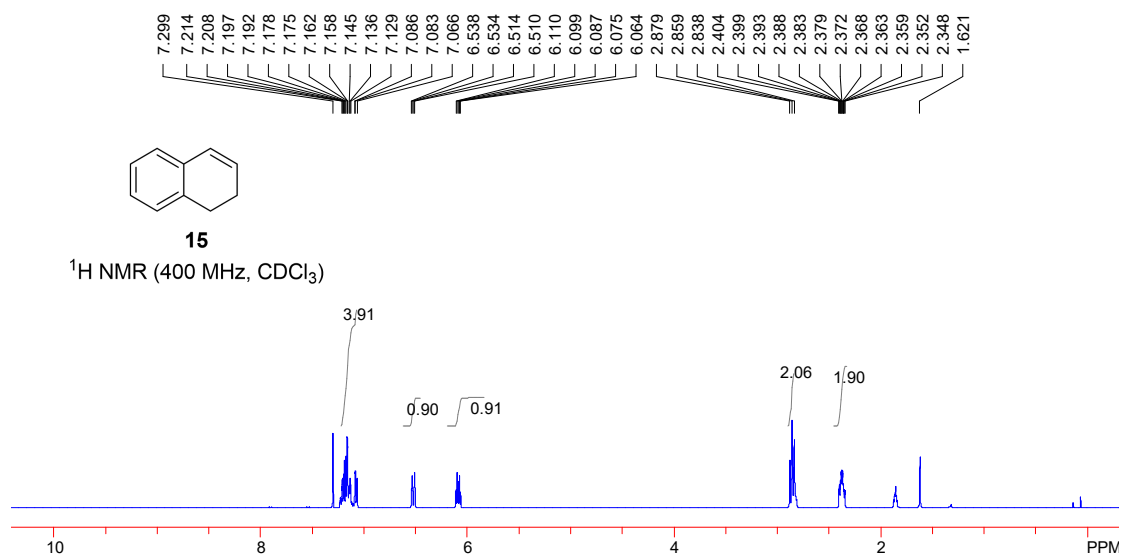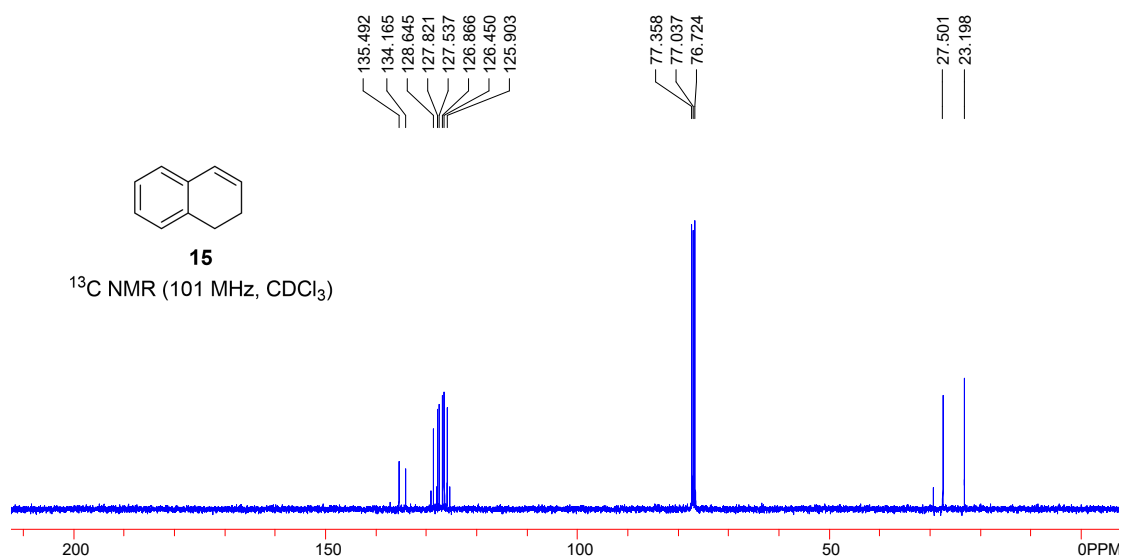

7.286  
7.210  
7.204  
7.188  
7.182  
7.089  
7.083  
6.675  
6.654  
6.384  
6.380  
6.376  
6.359  
6.355  
6.351  
5.846  
5.837  
5.828  
5.821  
5.812  
5.803  
4.853  
4.848  
4.844  
4.839

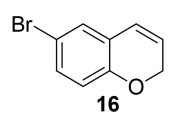

<sup>1</sup>H NMR (400 MHz, CDCl<sub>3</sub>)

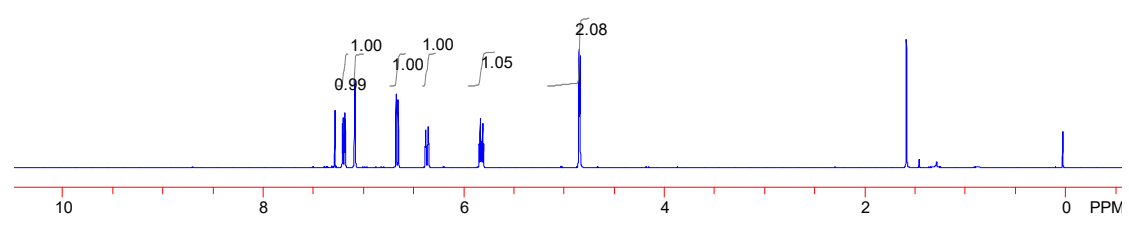

153.133  
131.620  
129.031  
124.138  
123.584  
123.190  
117.473  
113.236  
77.336  
77.016  
76.702  
65.632

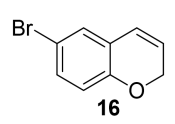

<sup>13</sup>C NMR (101 MHz, CDCl<sub>3</sub>)

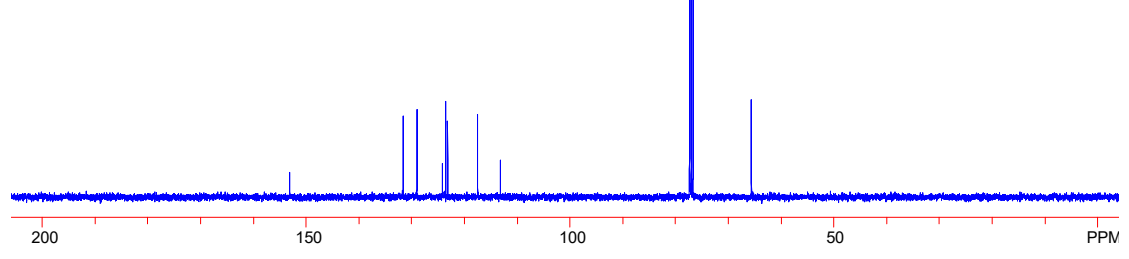

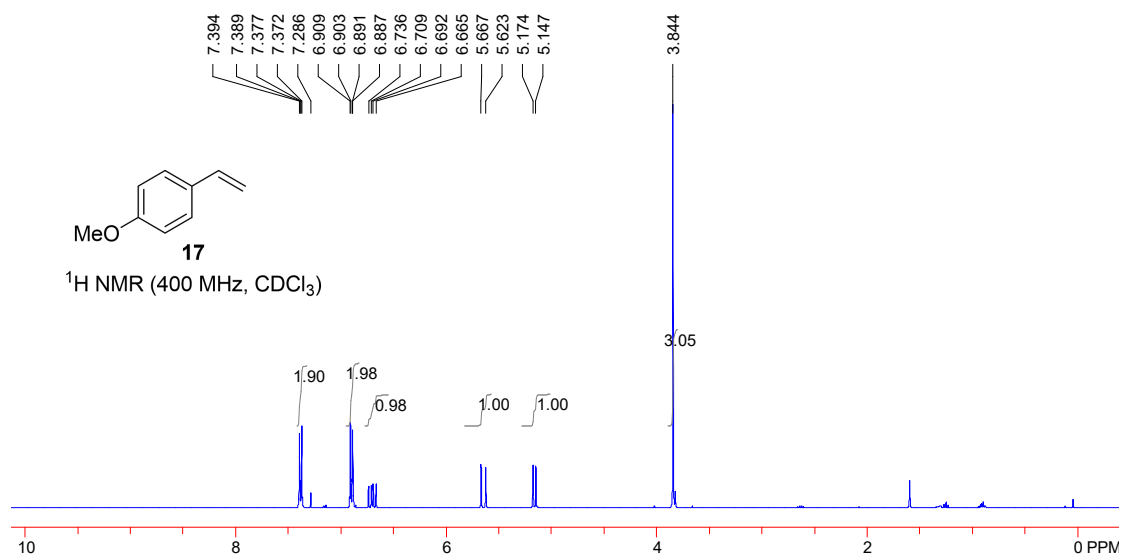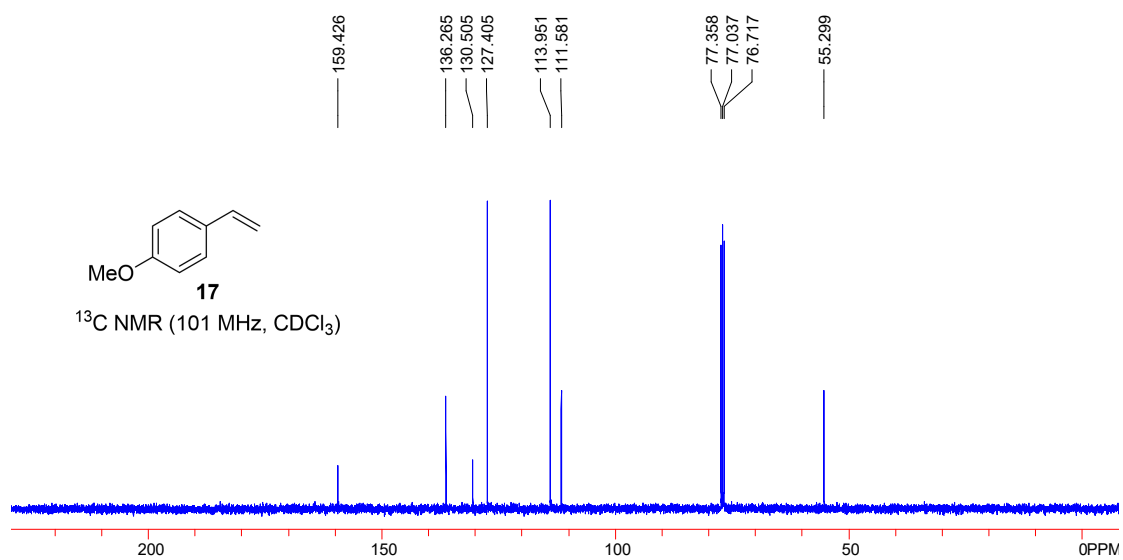

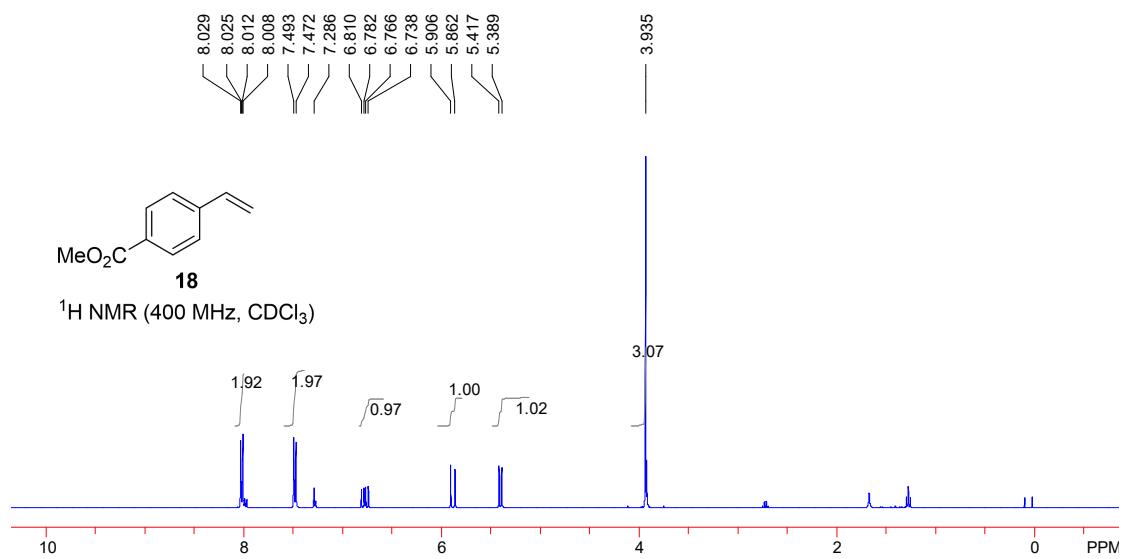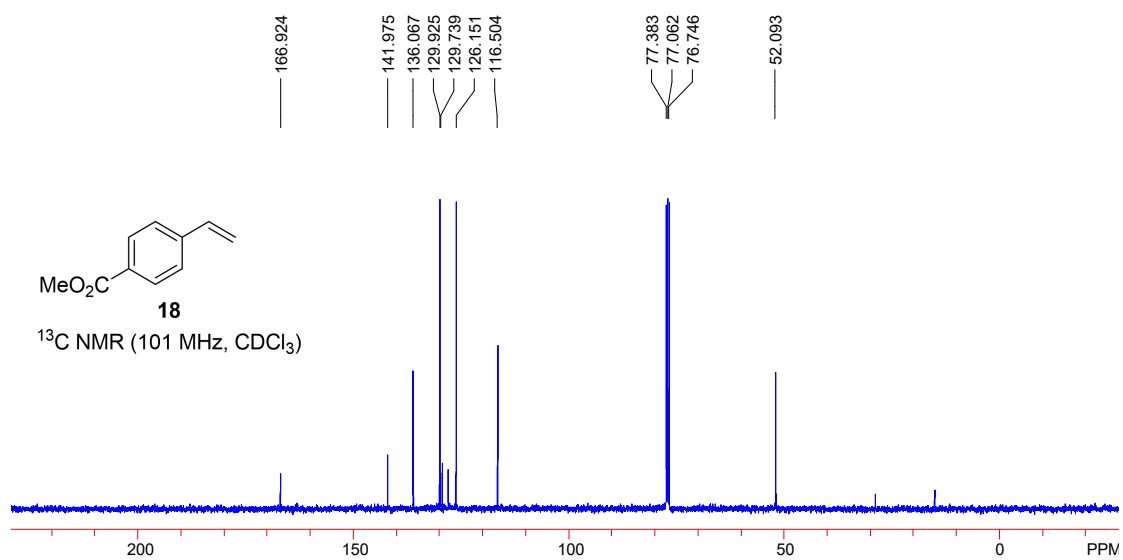



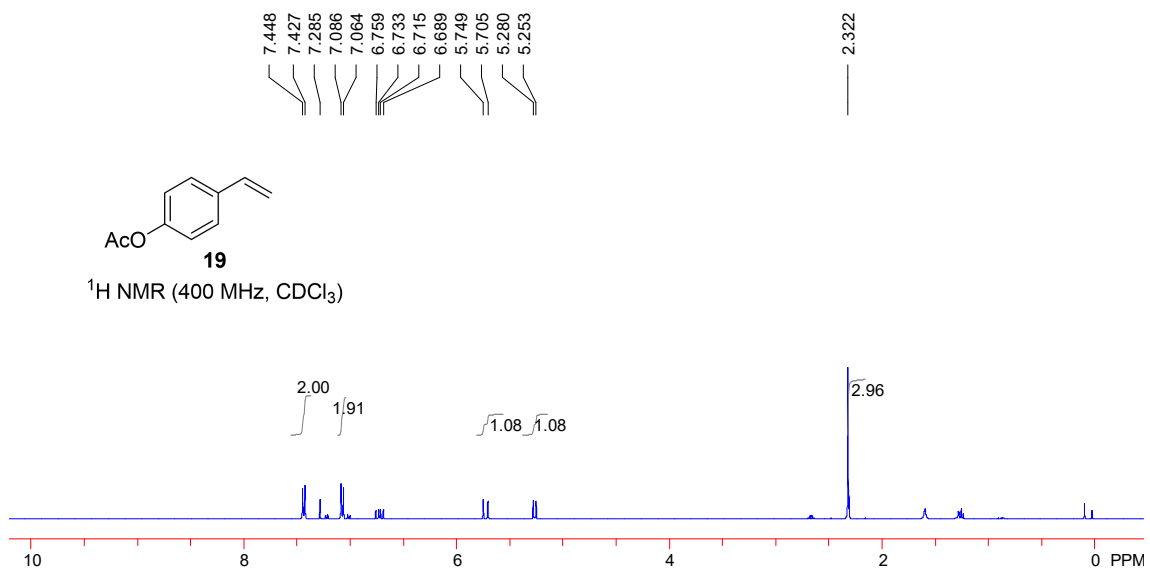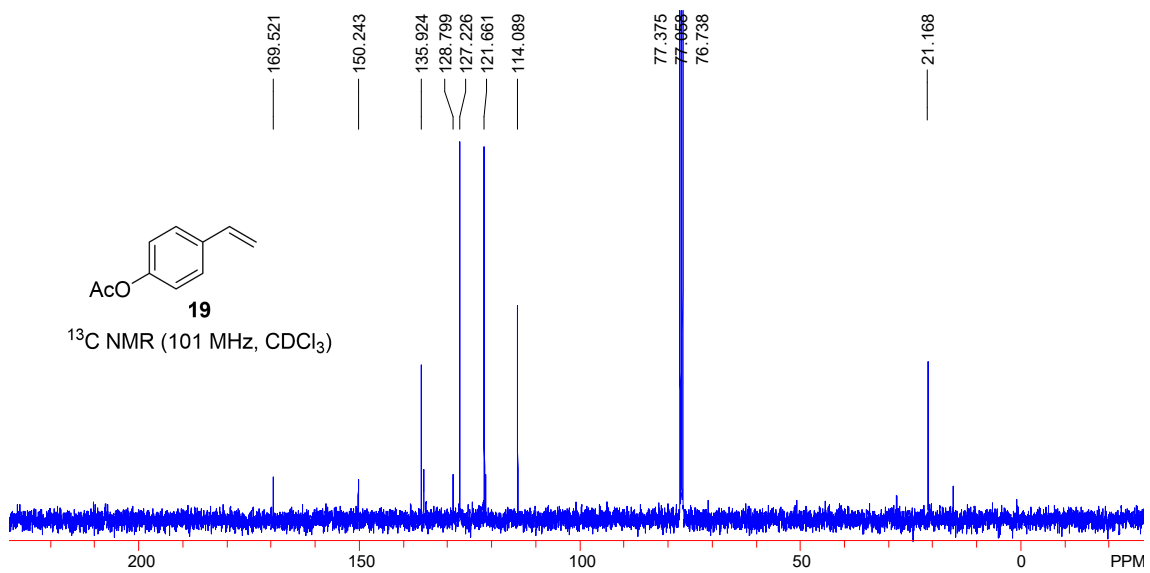

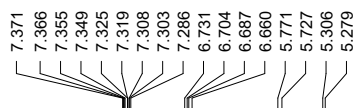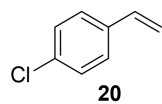

<sup>1</sup>H NMR (400 MHz, CDCl<sub>3</sub>)

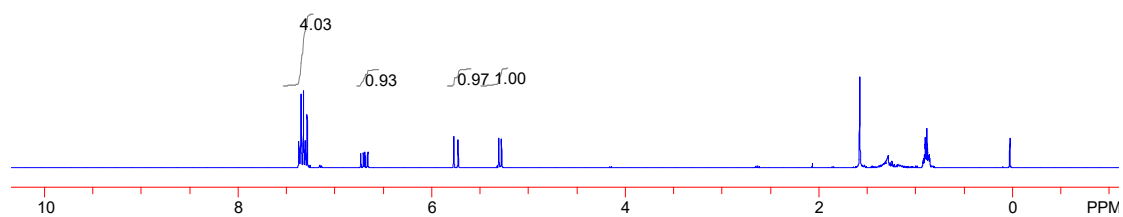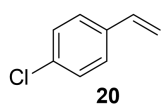

<sup>13</sup>C NMR (101 MHz, CDCl<sub>3</sub>)

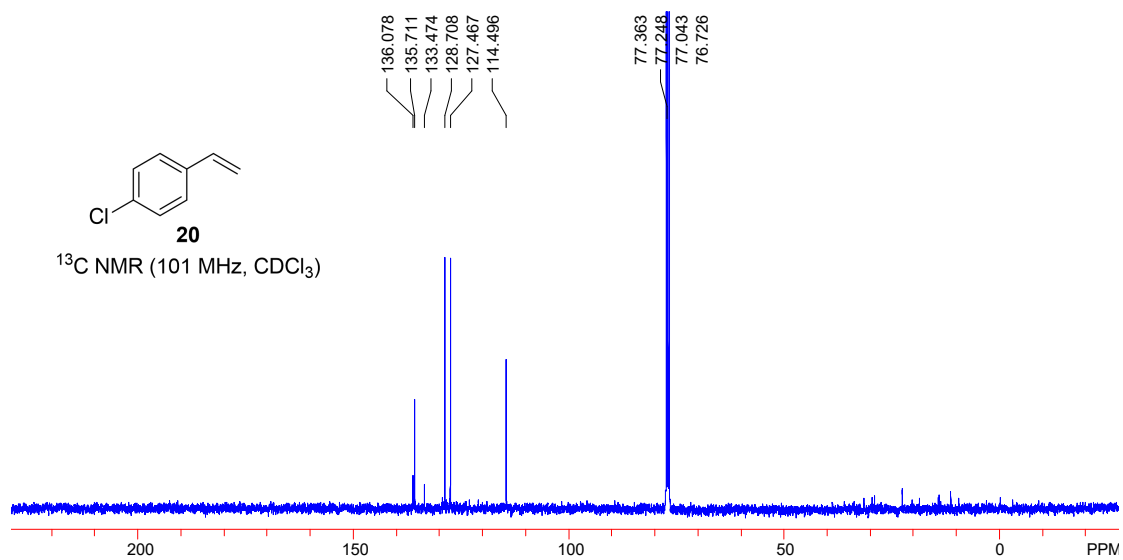

7.657  
7.653  
7.648  
7.635  
7.633  
7.624  
7.619  
7.607  
7.602  
7.539  
7.518  
7.499  
7.495  
7.481  
7.465  
7.461  
7.405  
7.402  
7.399  
7.384  
7.285  
6.840  
6.813  
6.796  
6.769  
5.860  
5.859  
5.816  
5.815  
5.332  
5.331  
5.305

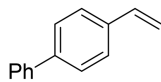

**21**

$^1\text{H NMR}$  (400 MHz,  $\text{CDCl}_3$ )

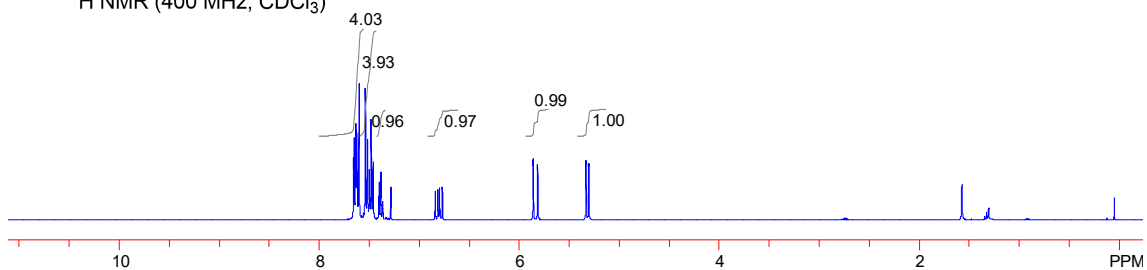

140.793  
140.647  
136.659  
136.470  
128.838  
127.372  
127.285  
127.020  
126.700  
113.947  
77.386  
77.070  
76.750

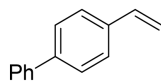

**21**

$^{13}\text{C NMR}$  (101 MHz,  $\text{CDCl}_3$ )

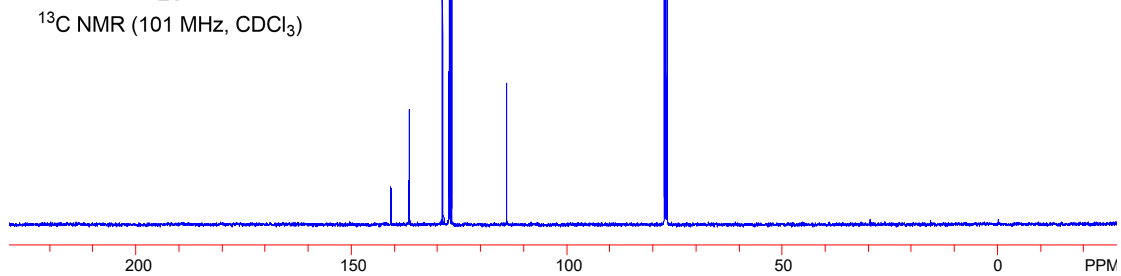

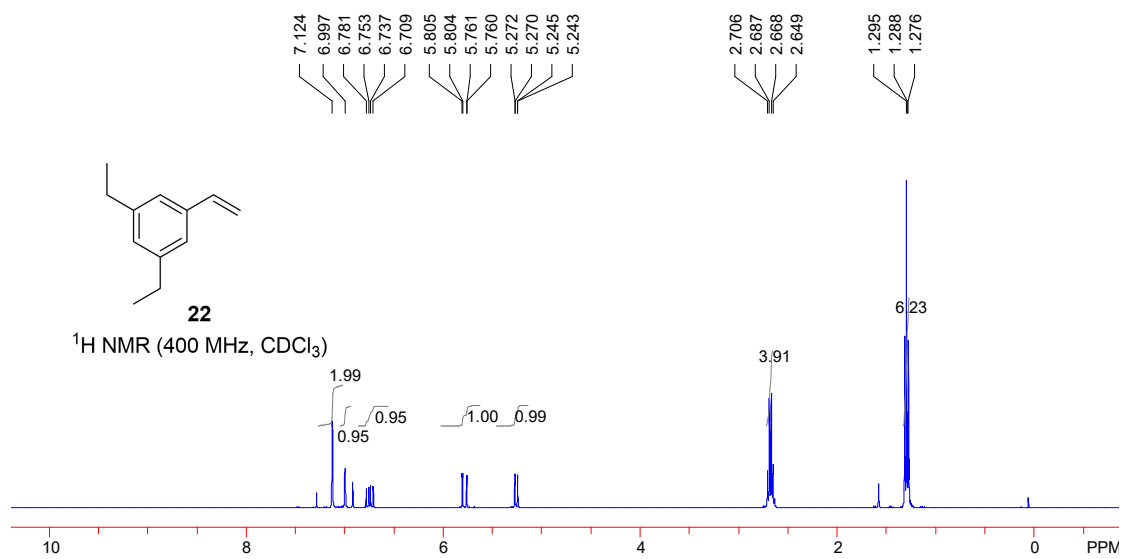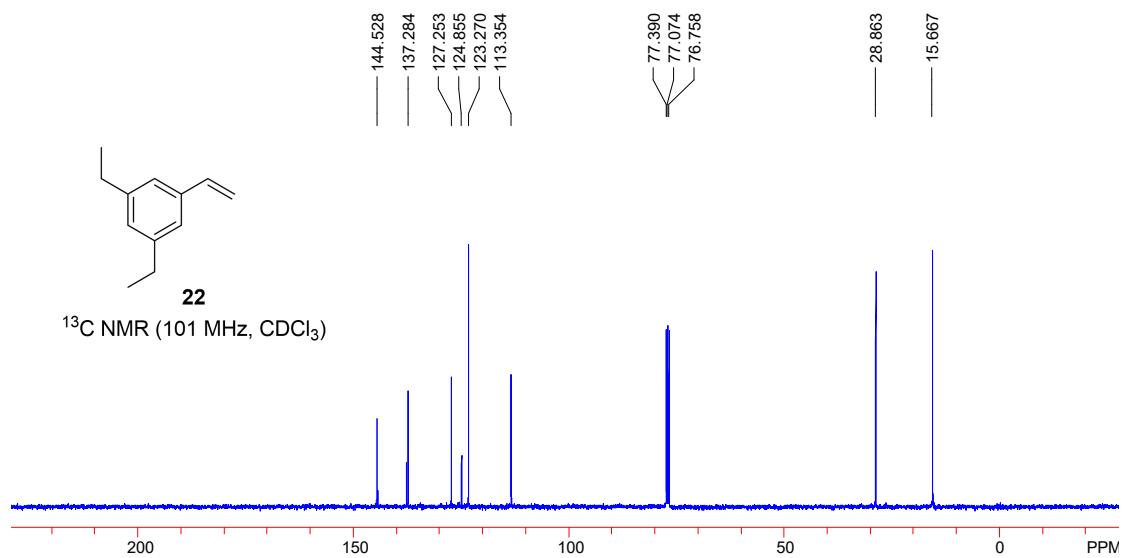

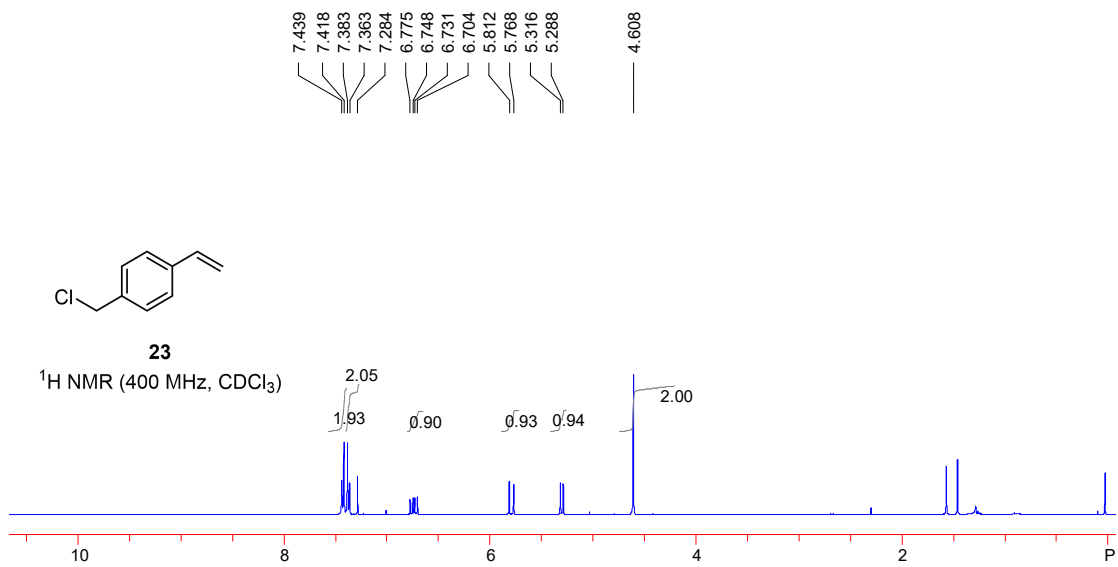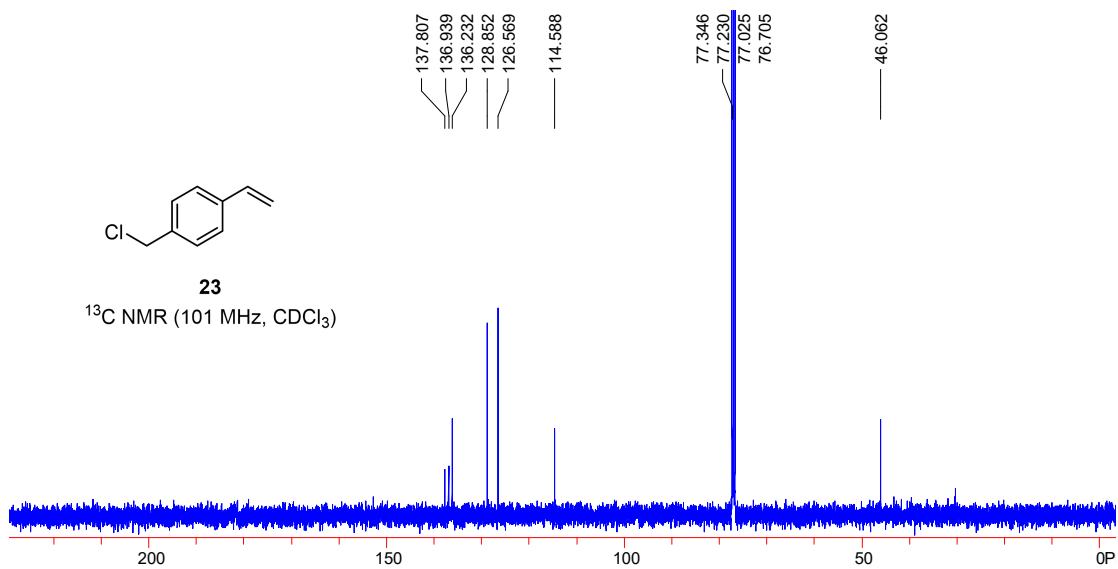

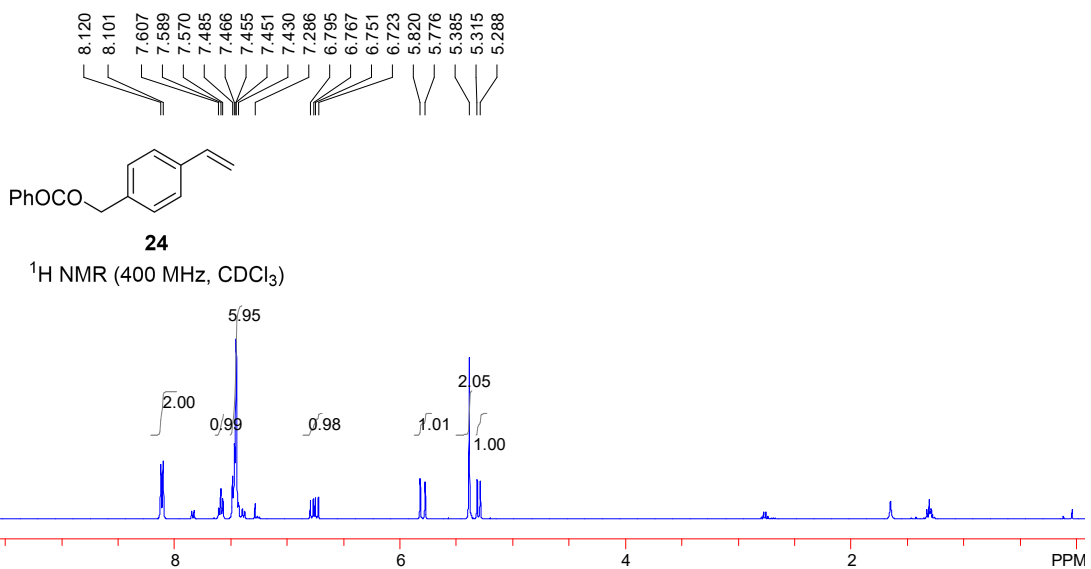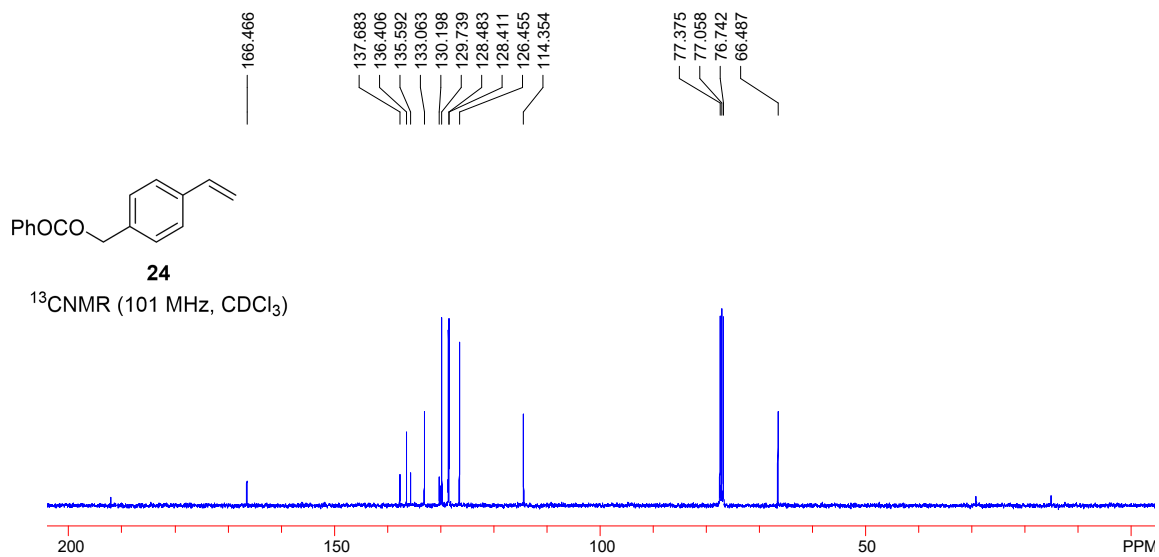

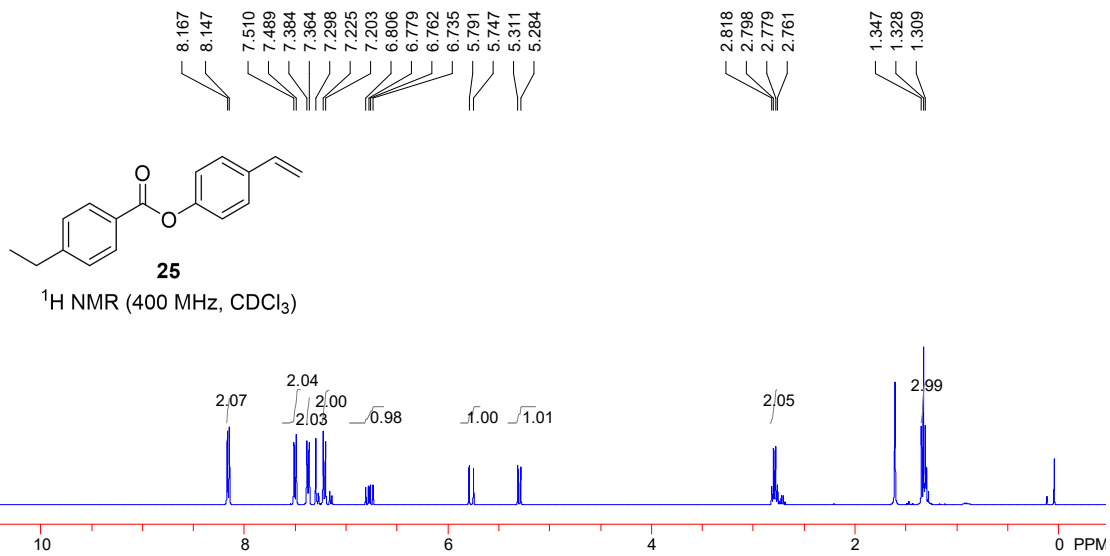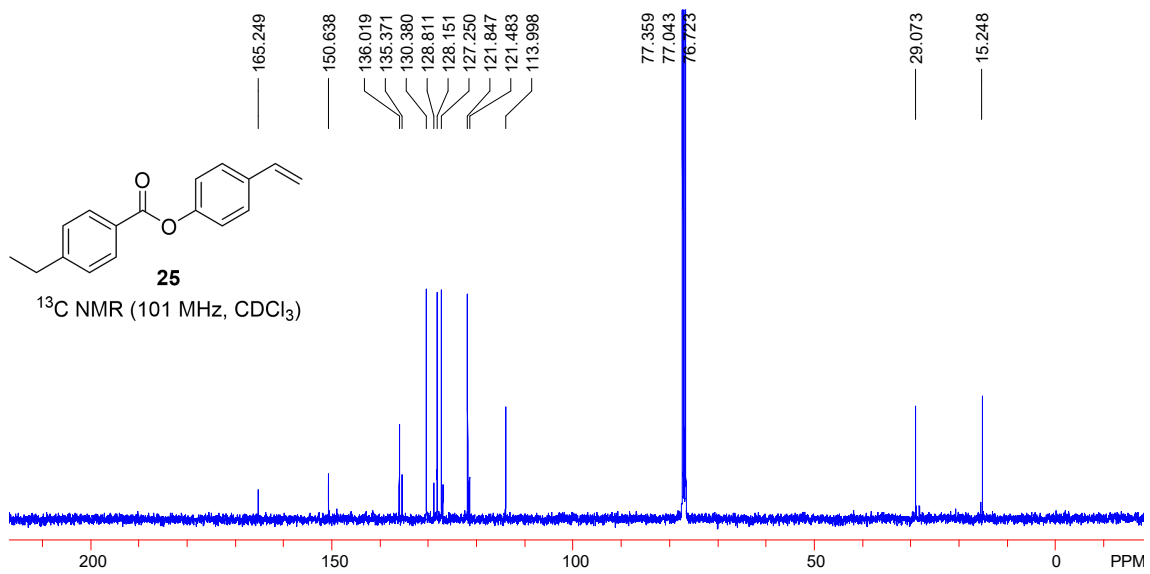

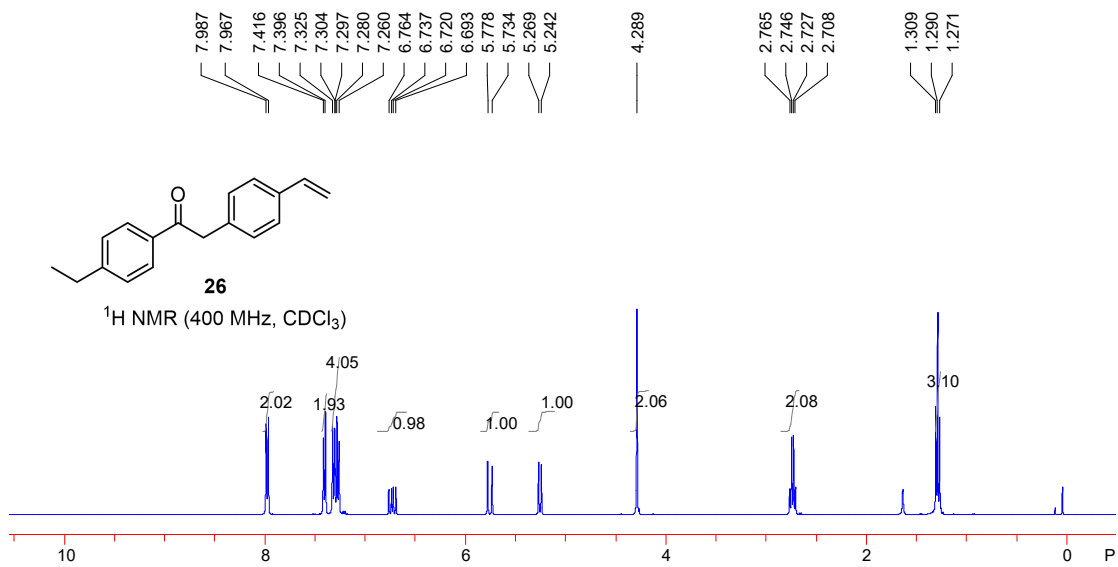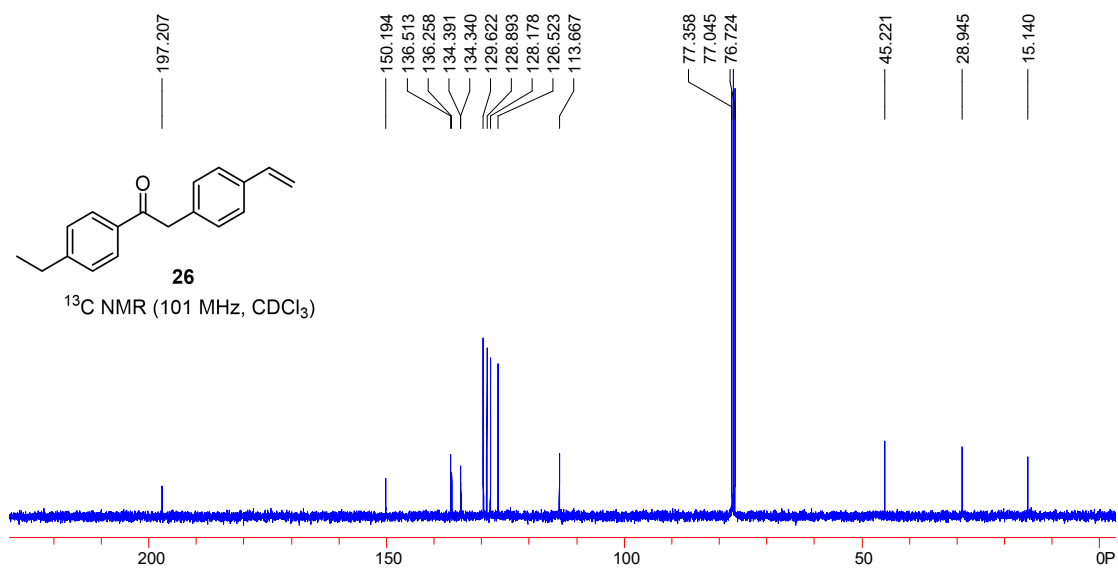



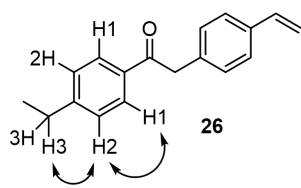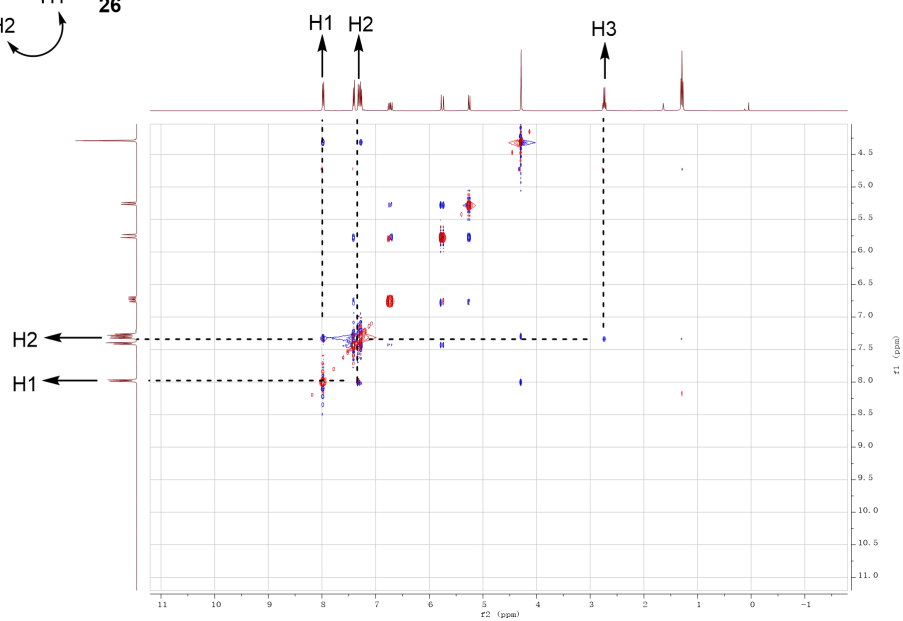

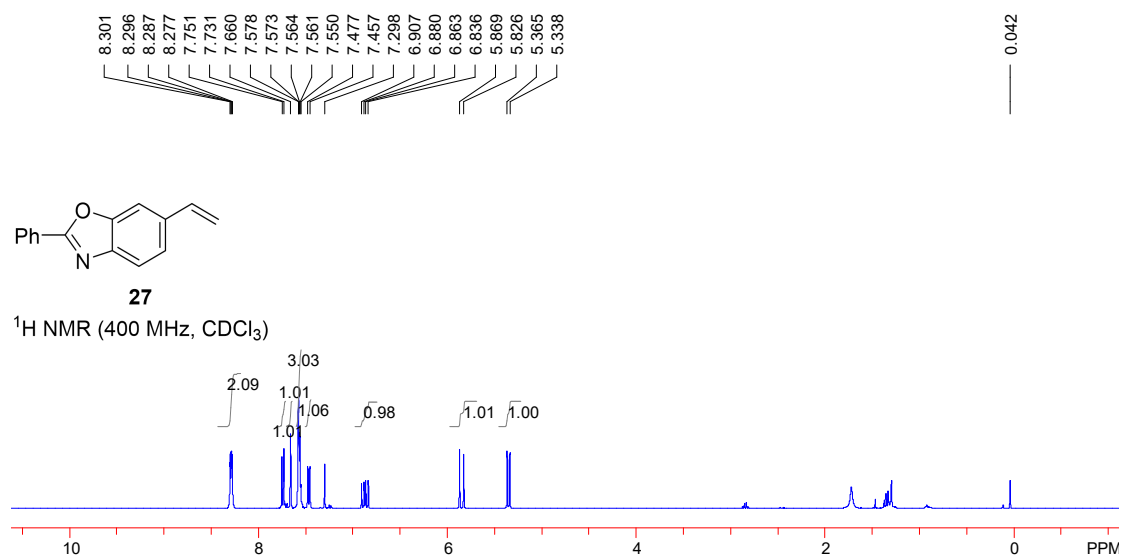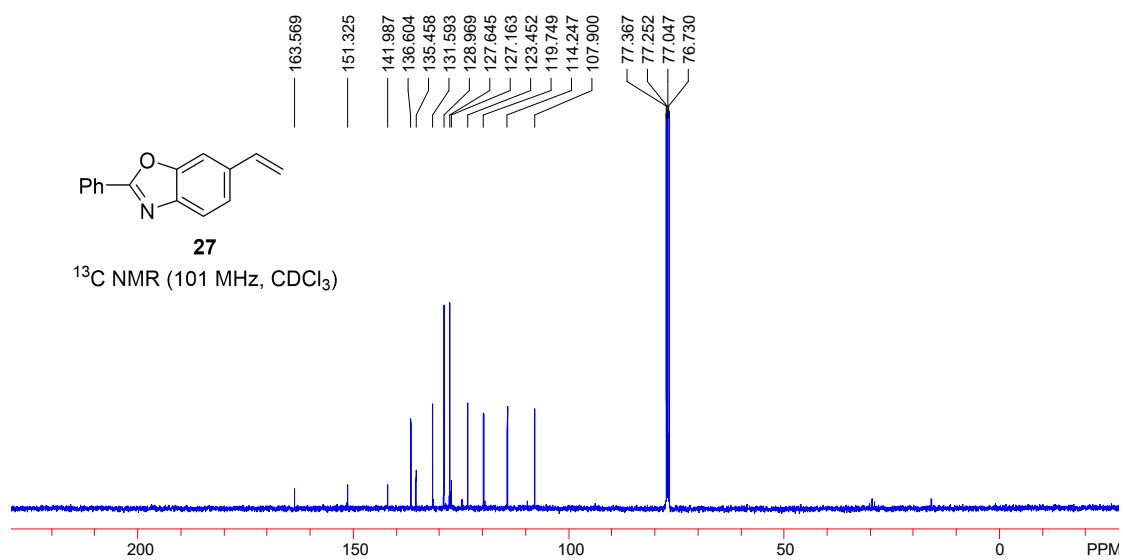

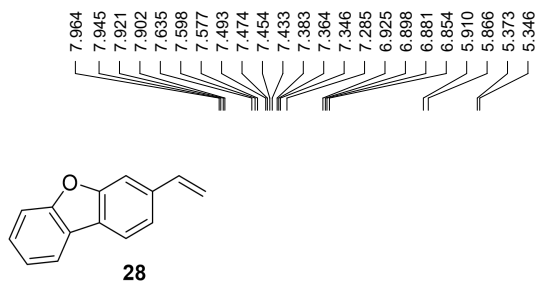

$^1\text{H NMR}$  (400 MHz,  $\text{CDCl}_3$ )

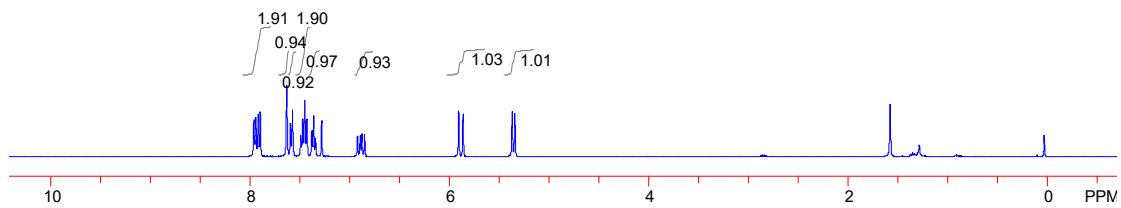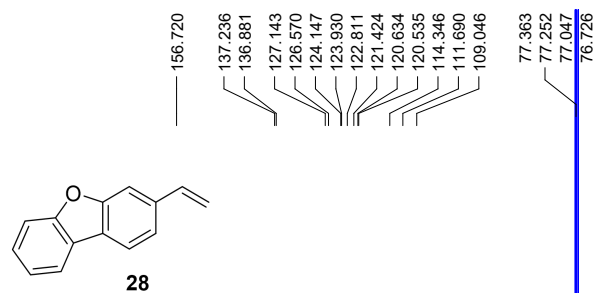

$^{13}\text{C NMR}$  (101 MHz,  $\text{CDCl}_3$ )

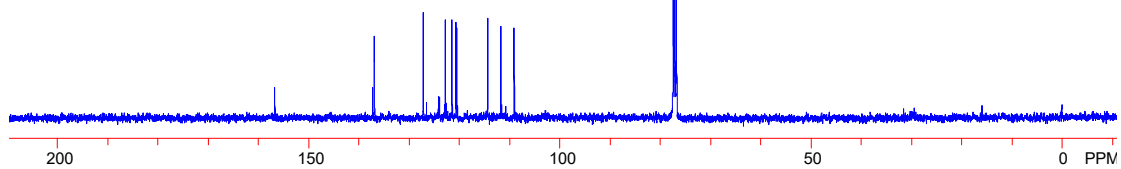

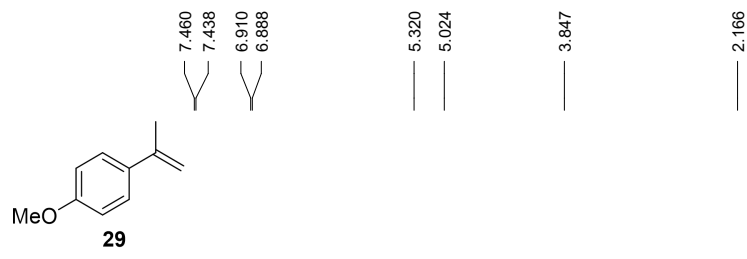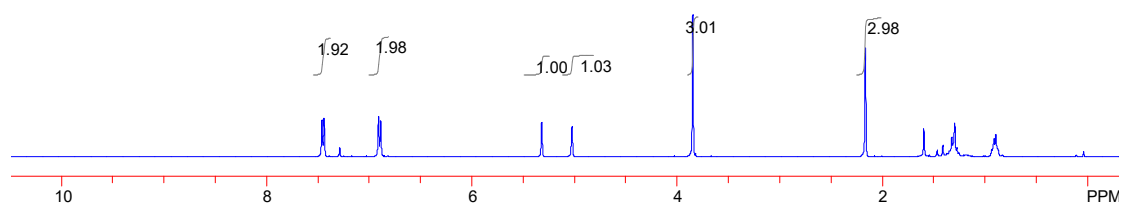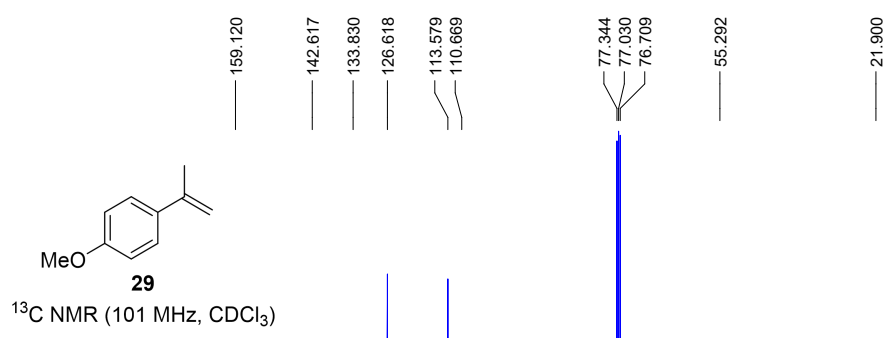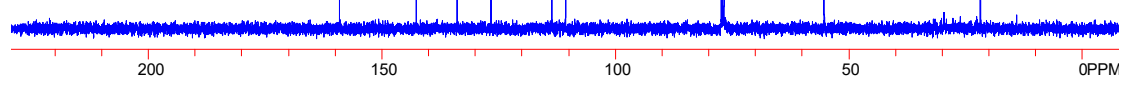

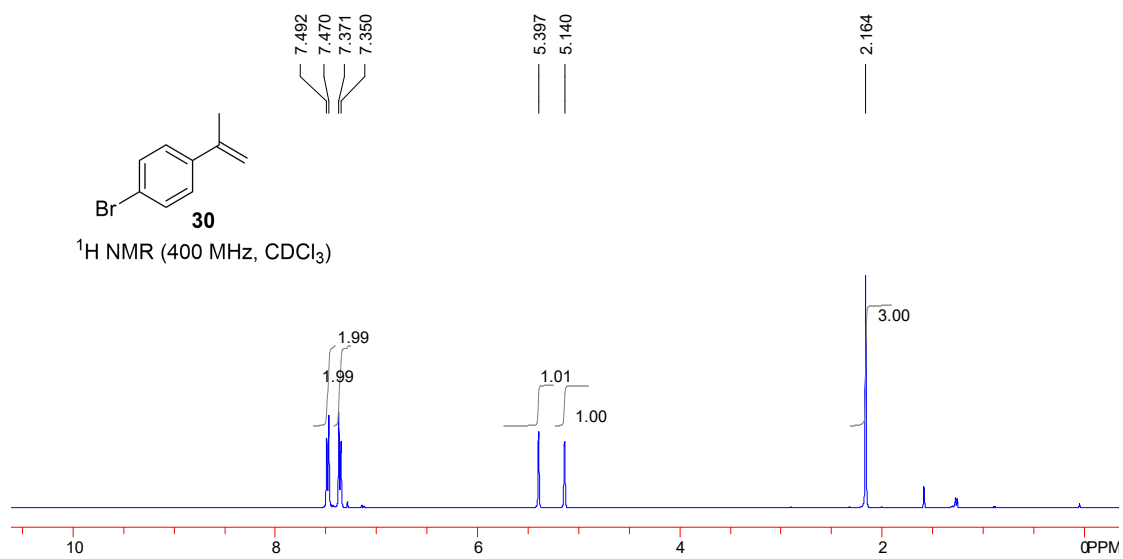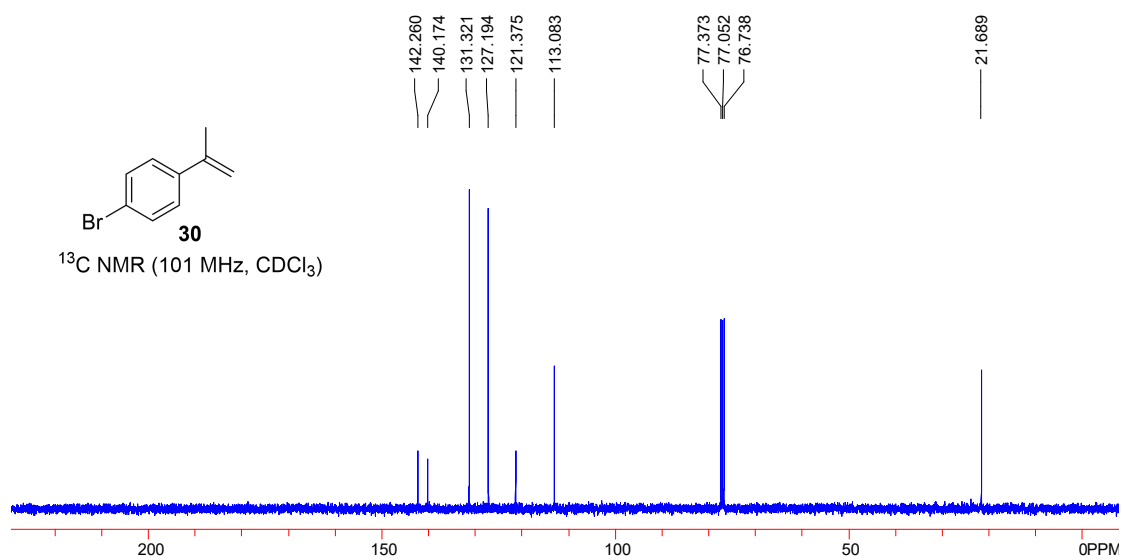

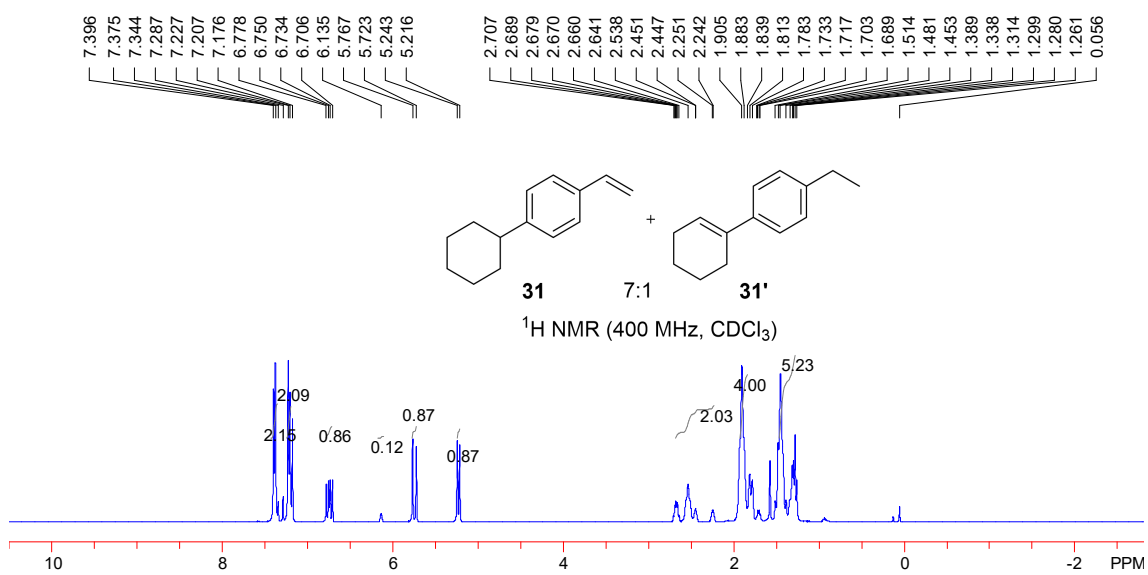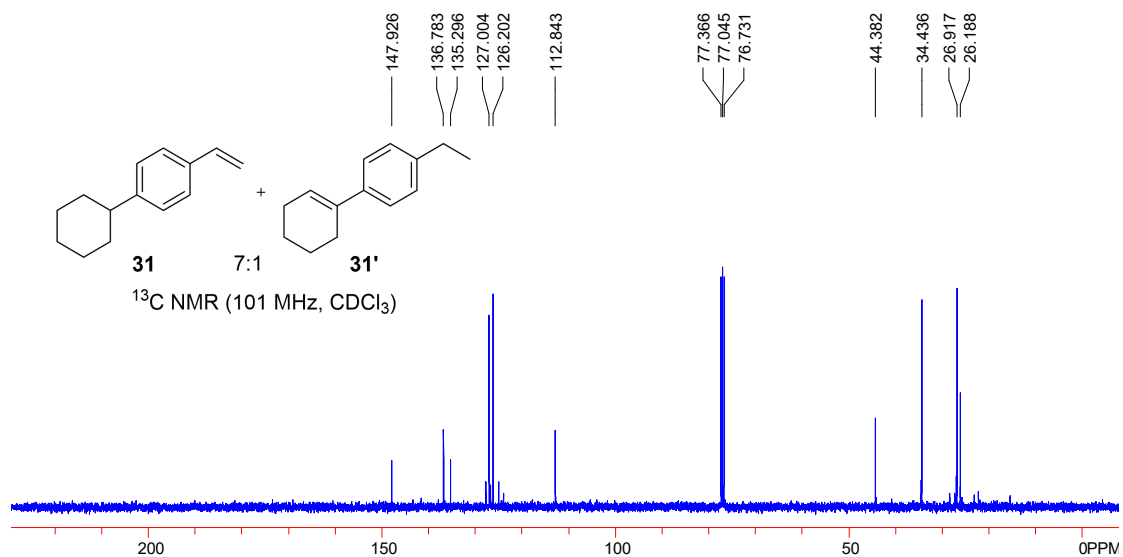

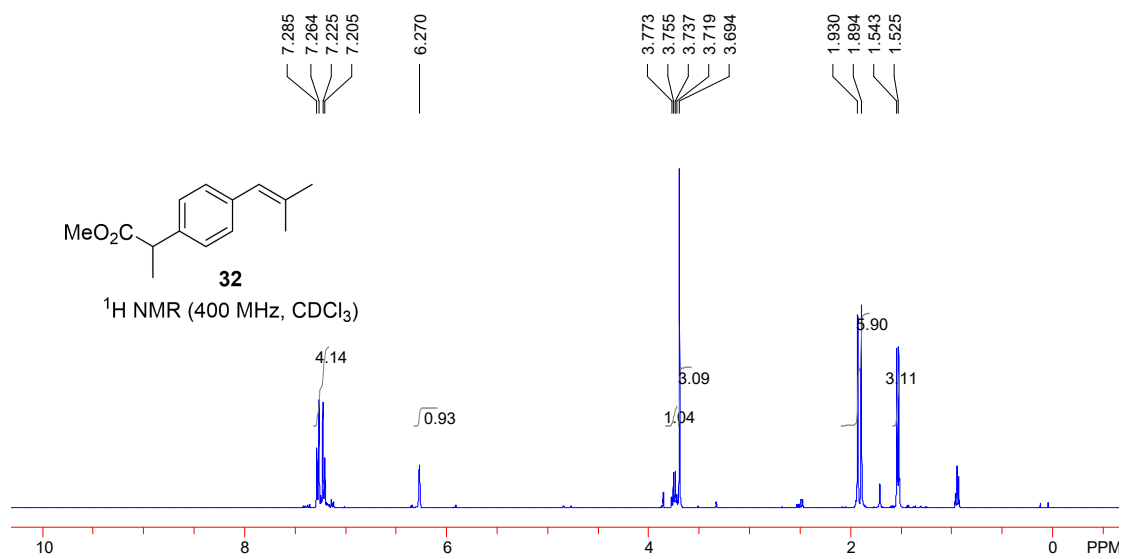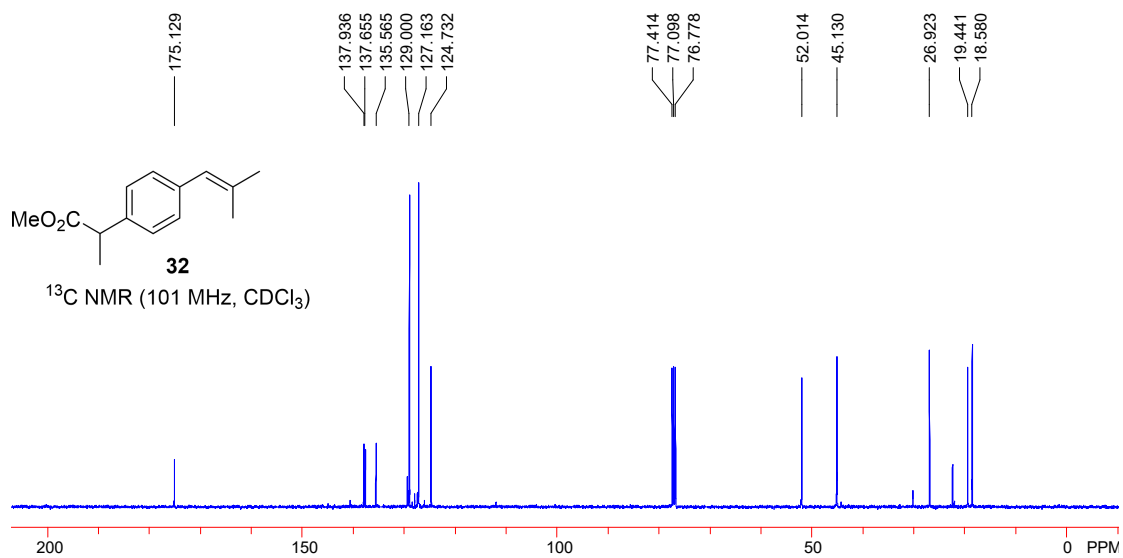

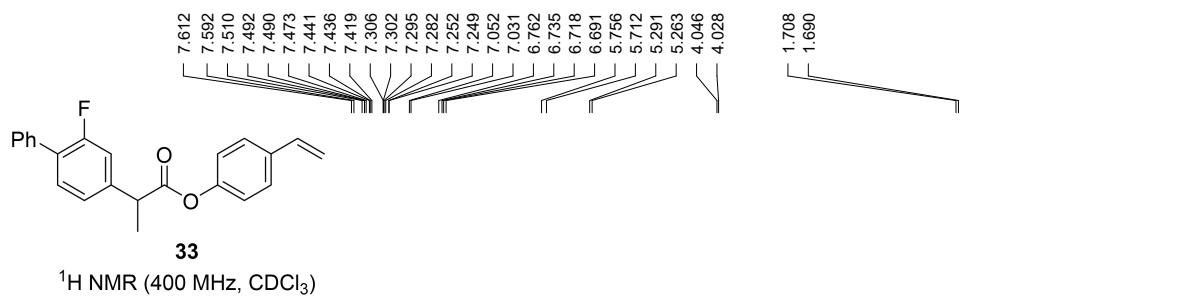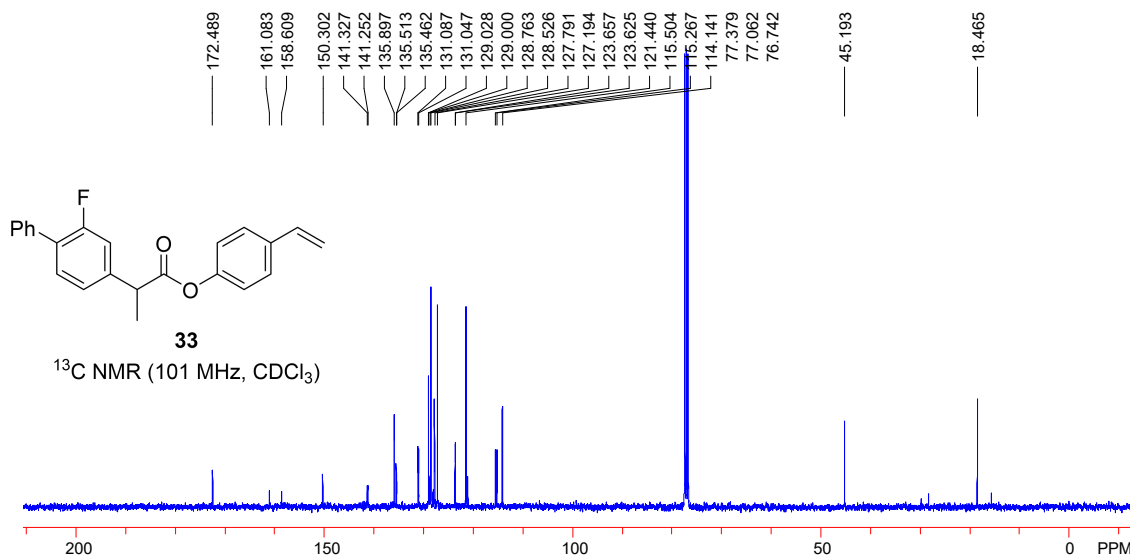



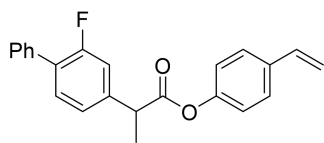

**33**

<sup>19</sup>F NMR (376 MHz, CDCl<sub>3</sub>)

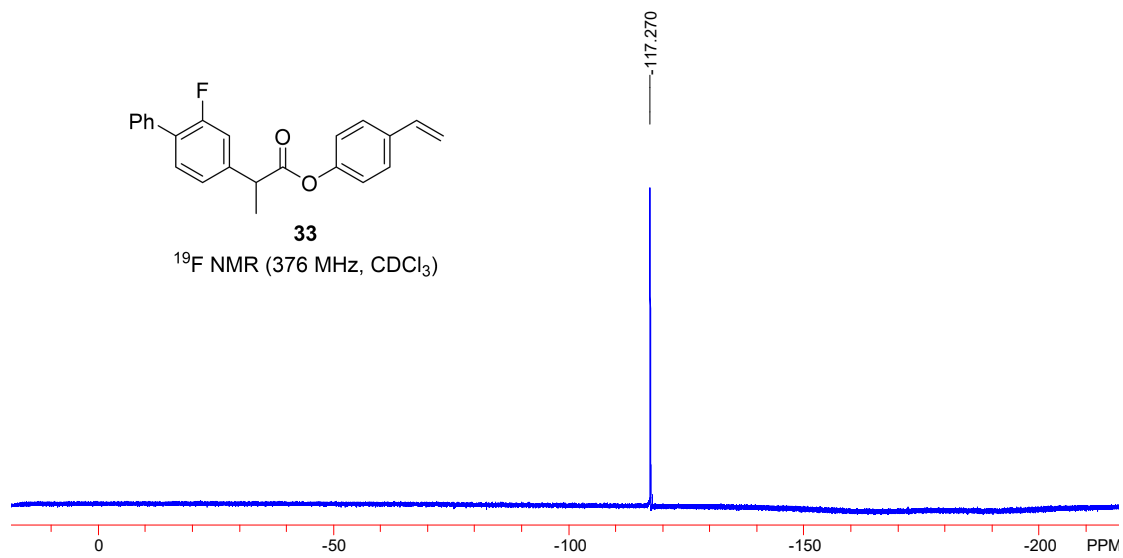

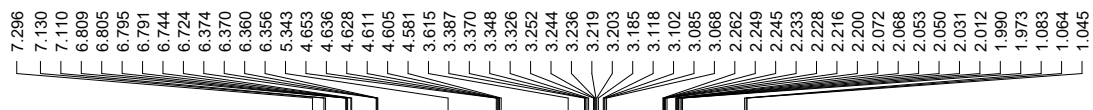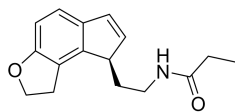

**34**

<sup>1</sup>H NMR (400 MHz, CDCl<sub>3</sub>)

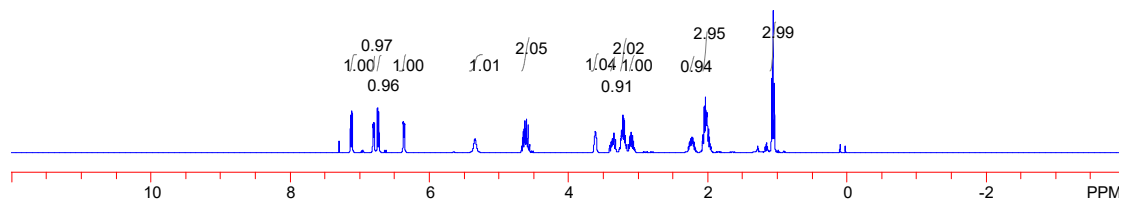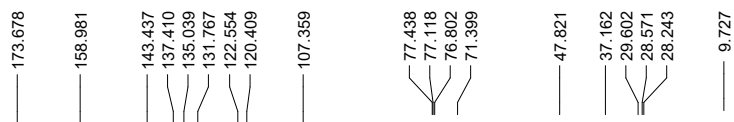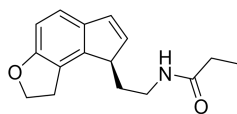

**34**

<sup>13</sup>C NMR (101 MHz, CDCl<sub>3</sub>)

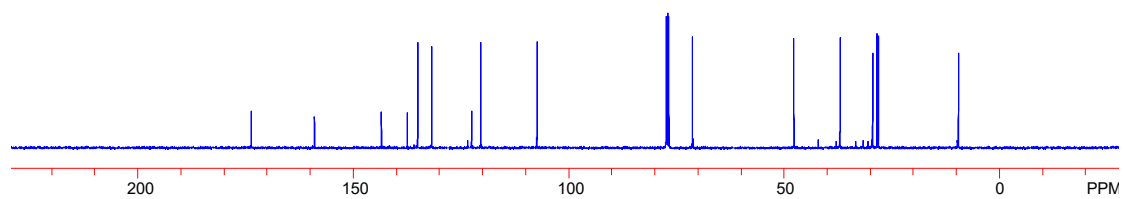

7.640  
7.635  
7.630  
7.395  
7.285  
7.173  
7.152  
6.977  
6.795  
6.792  
6.789  
3.514  
3.504  
3.485  
3.482  
3.473  
3.436  
3.441  
3.441  
3.415  
3.408  
3.394  
3.389  
3.389  
3.069  
3.075  
3.058  
3.054  
3.037  
3.037  
2.972  
2.965  
2.949  
2.933  
2.933  
2.926  
2.926  
2.447  
2.442  
2.426  
2.421  
2.410  
2.410  
2.394  
2.389  
2.222  
2.215  
2.215  
2.200  
2.200  
2.194  
2.185  
2.178  
2.169  
2.169  
2.128  
1.983  
1.969  
1.962  
1.957  
1.937  
1.930  
1.923  
1.815  
1.800  
1.800  
1.798  
1.798  
1.766  
1.150  
1.131  
1.112

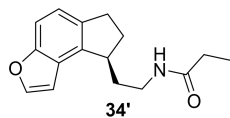

<sup>1</sup>H NMR (400 MHz, CDCl<sub>3</sub>)

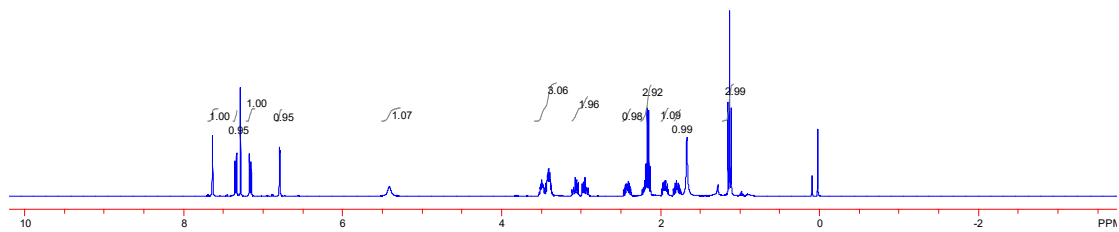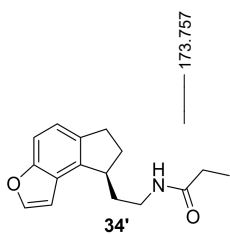

<sup>13</sup>C NMR (101 MHz, CDCl<sub>3</sub>)

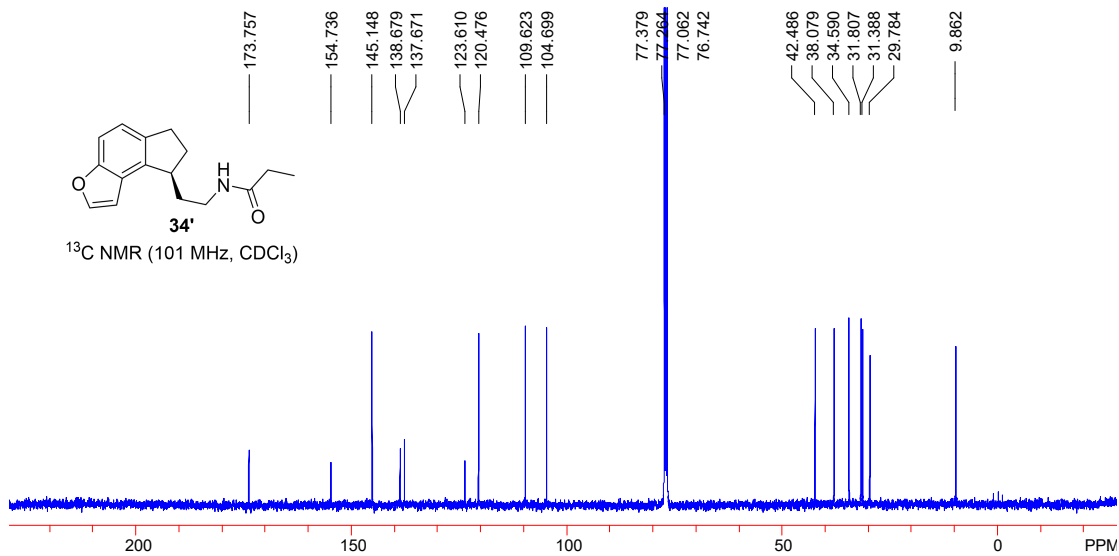

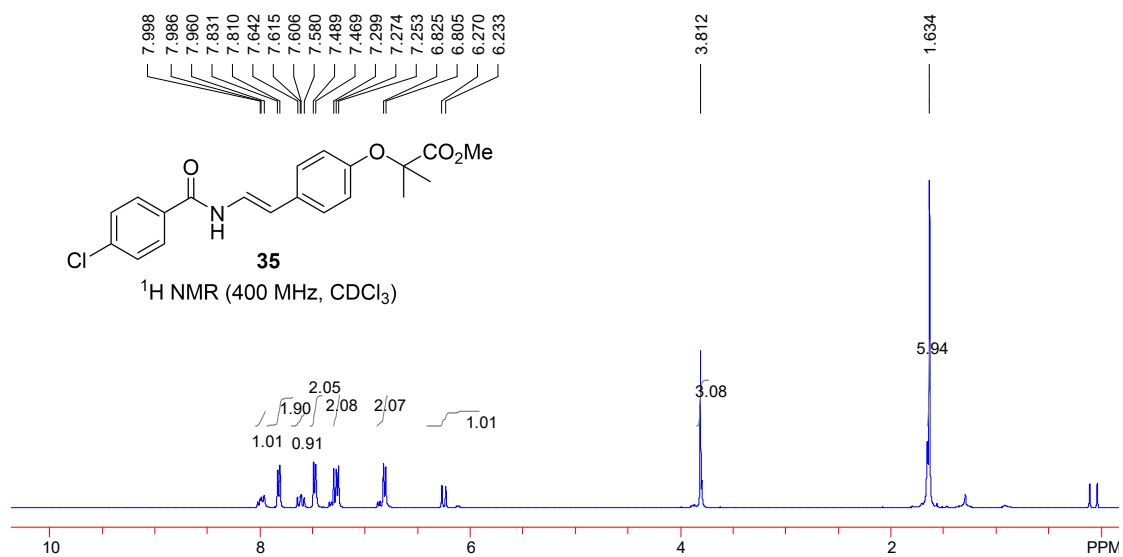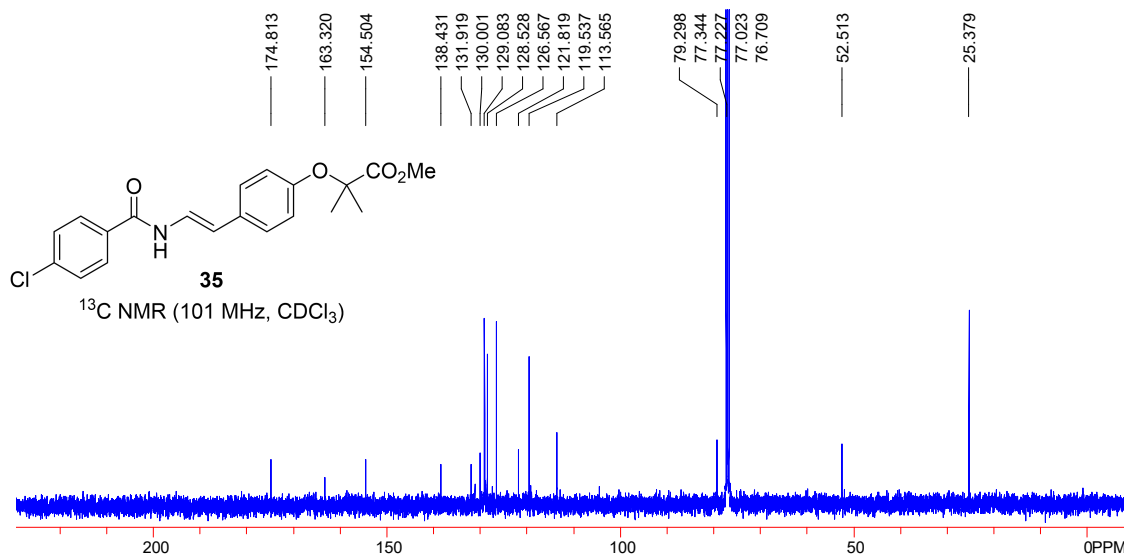

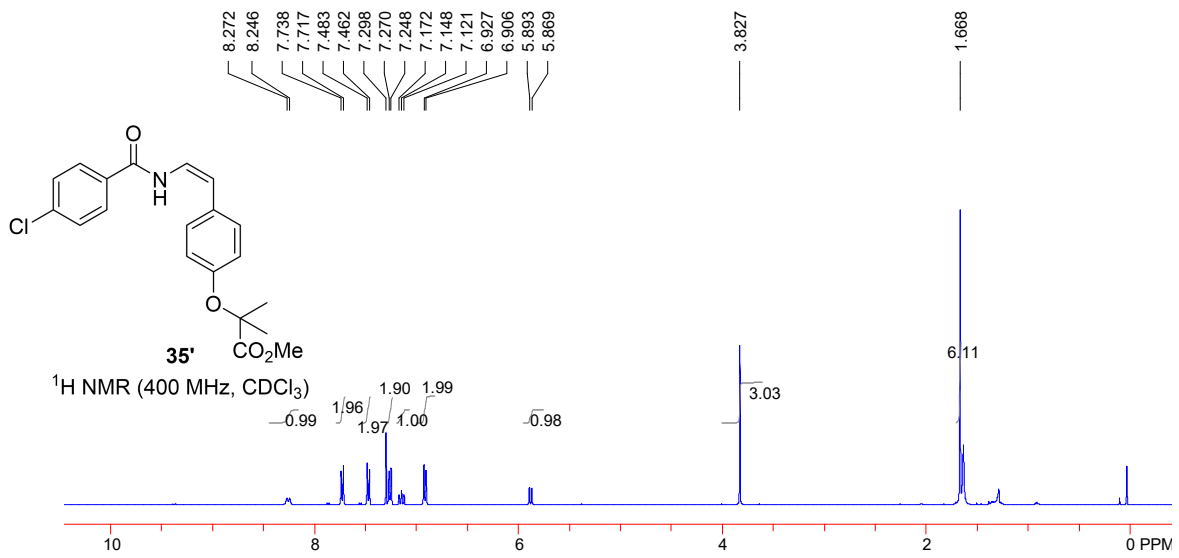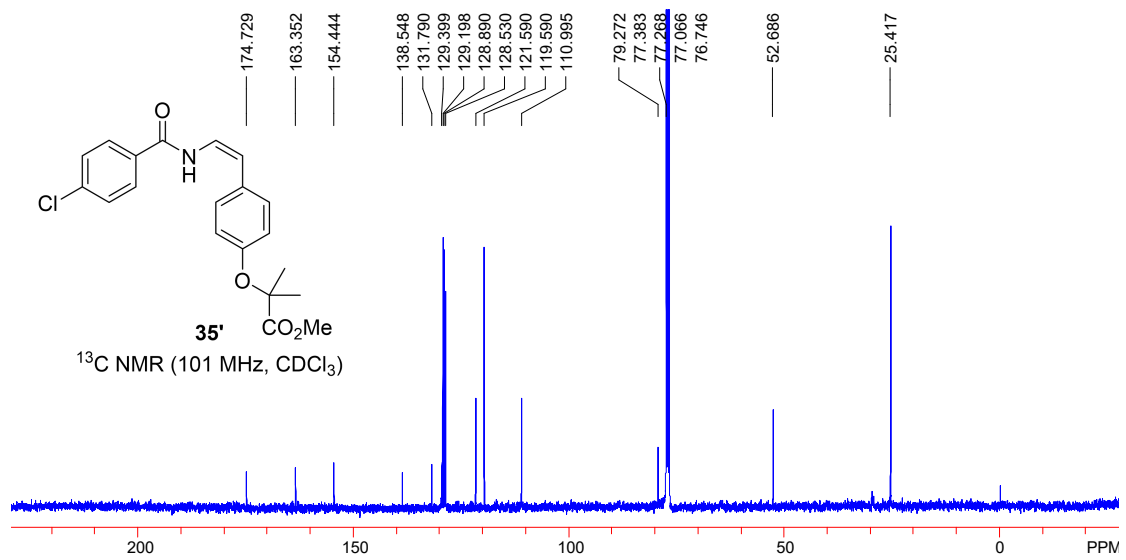

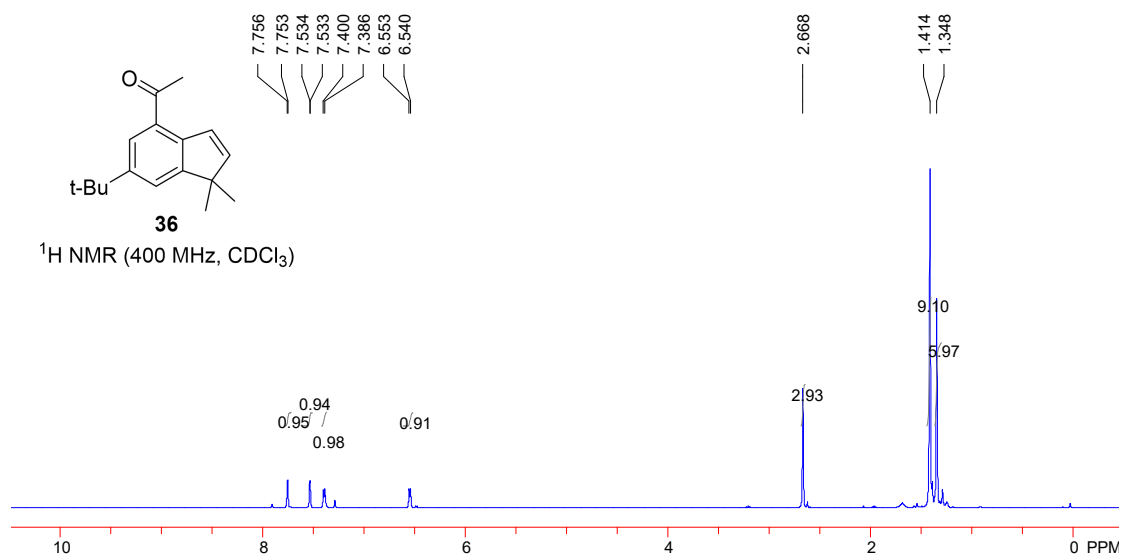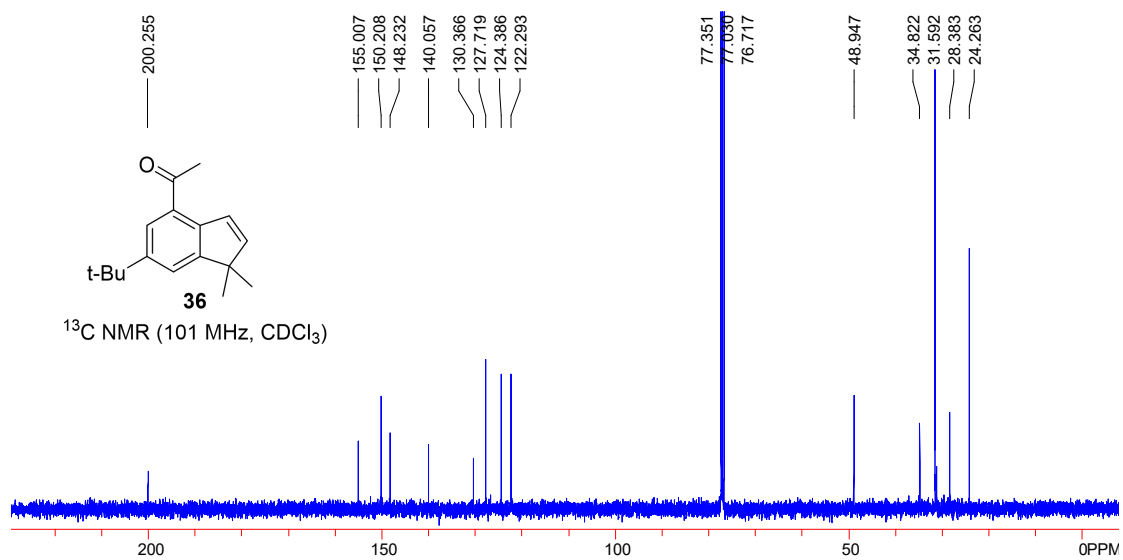

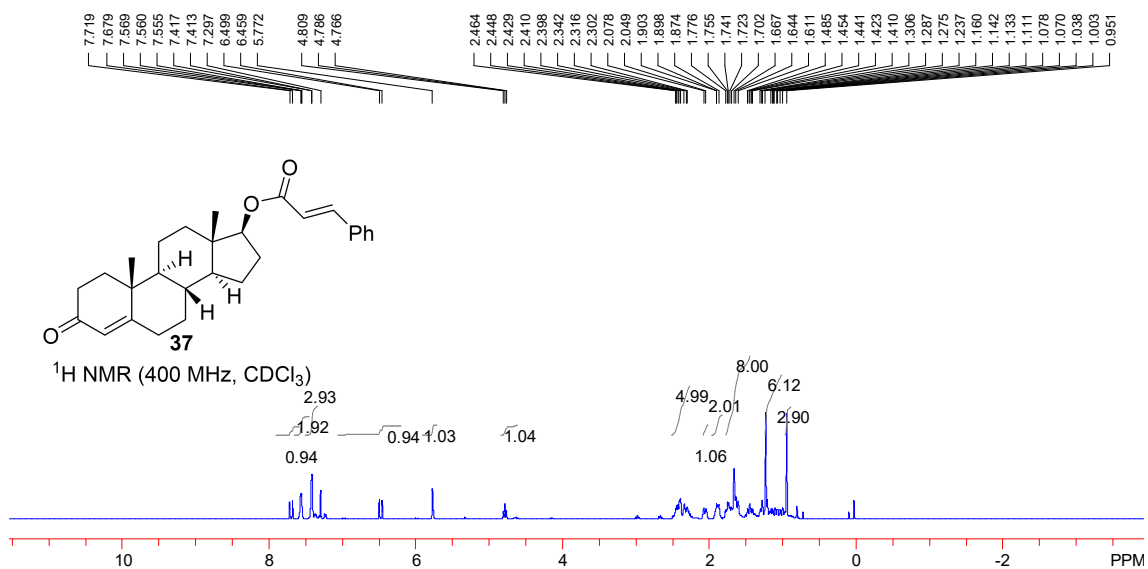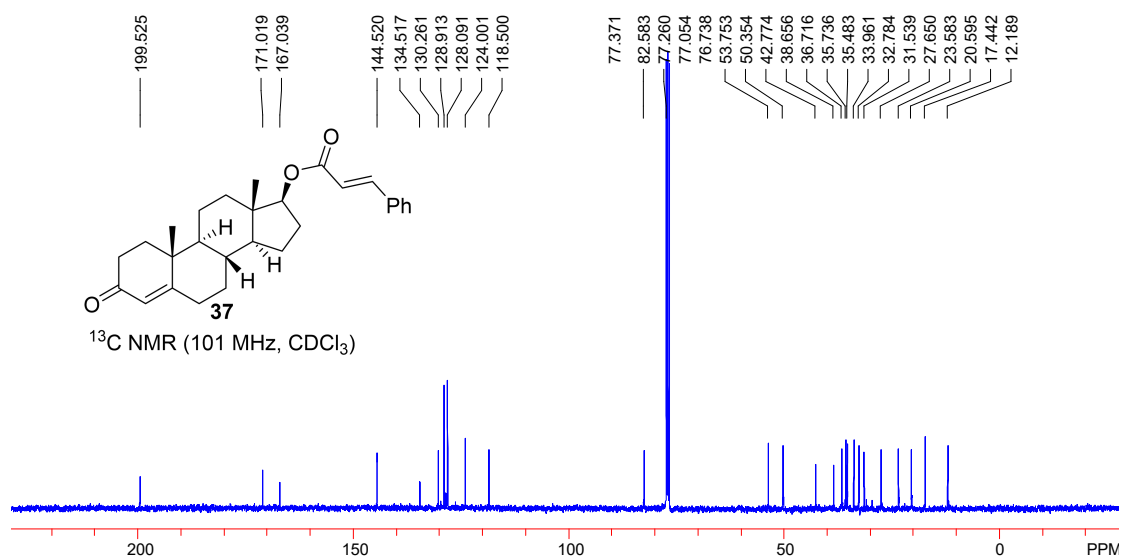

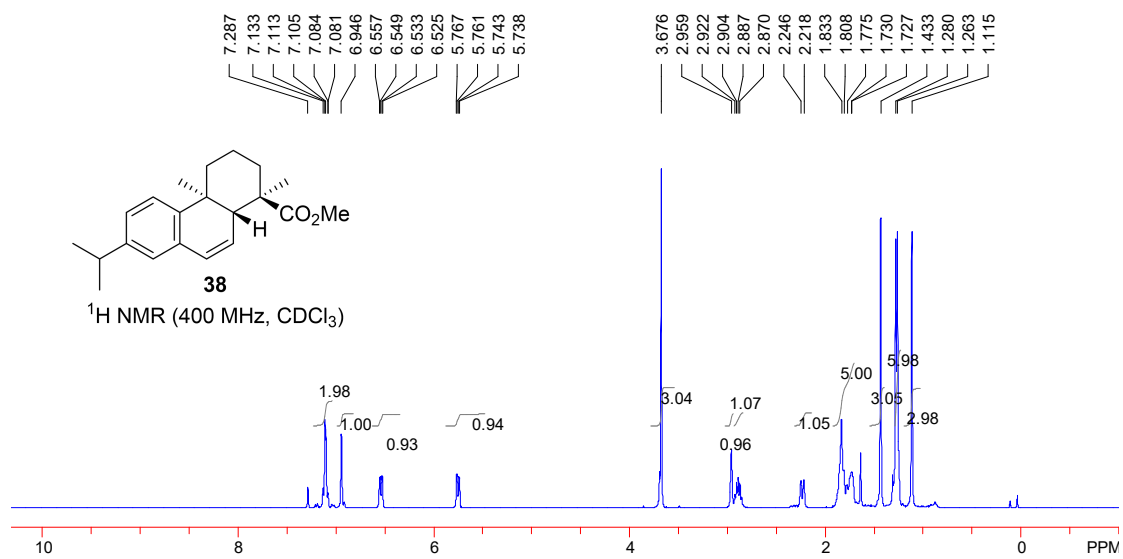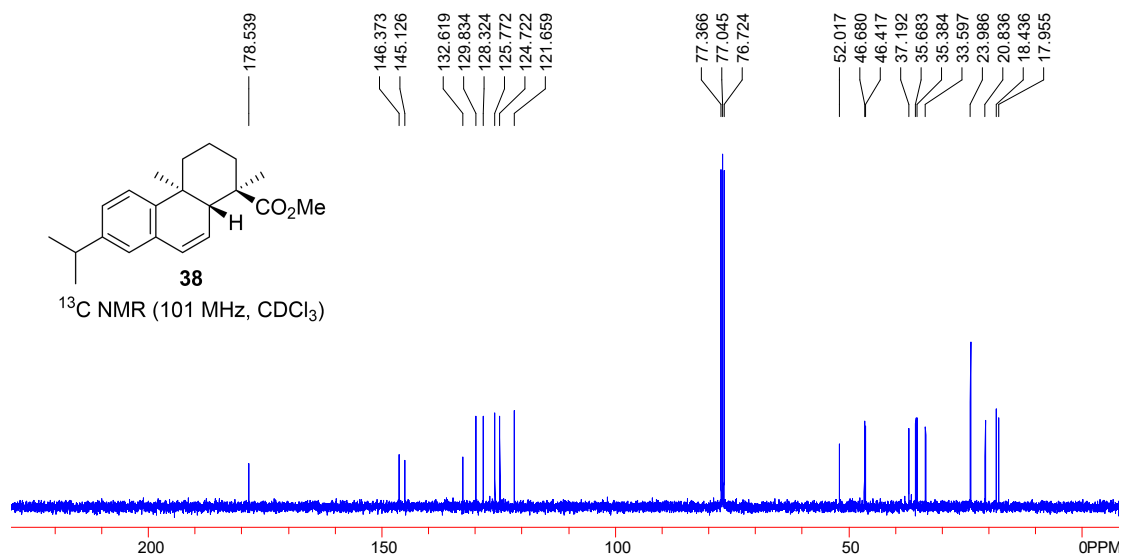



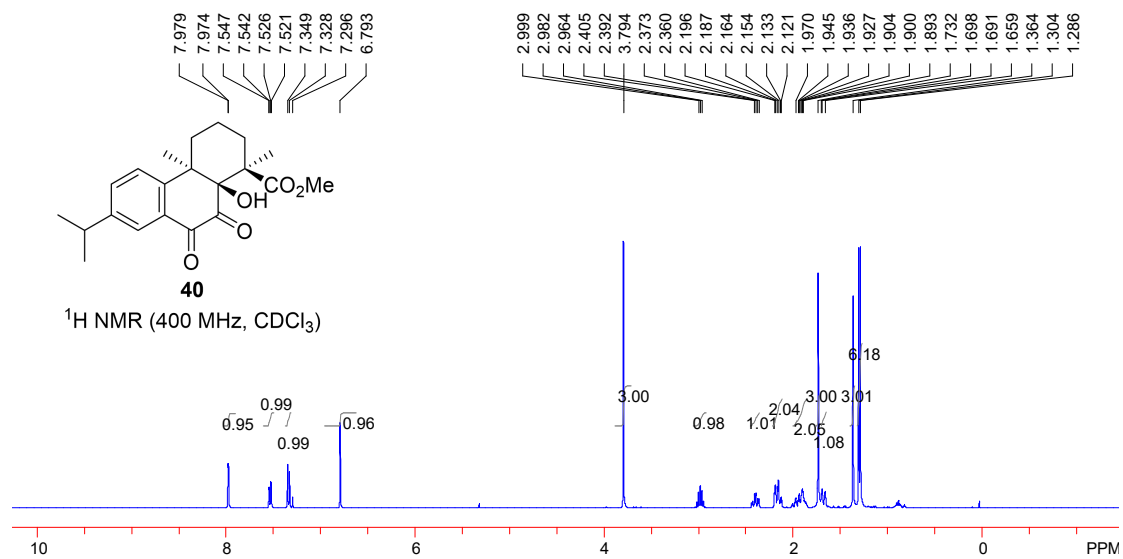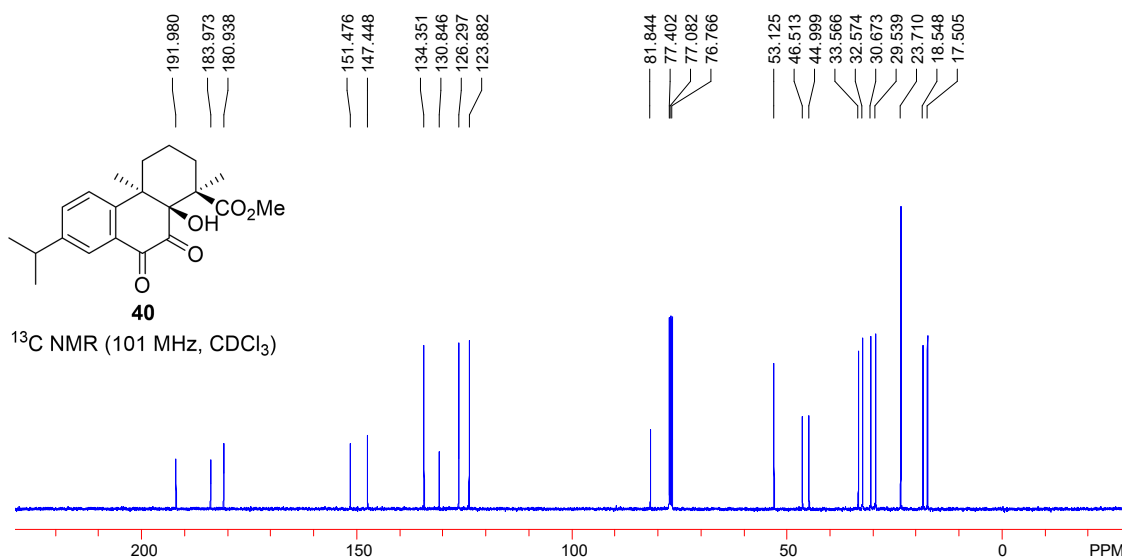

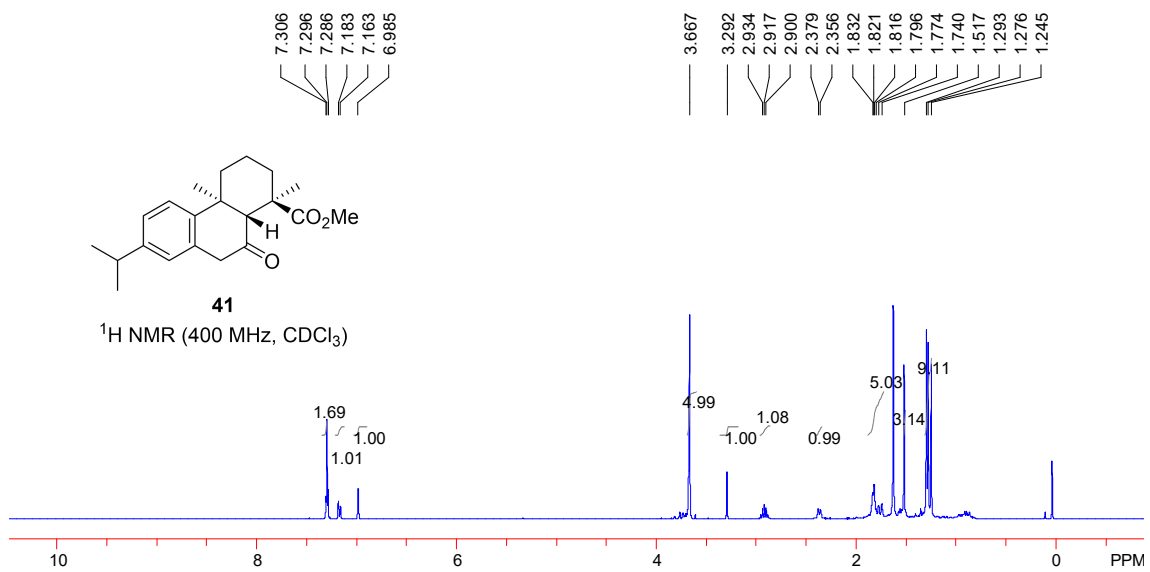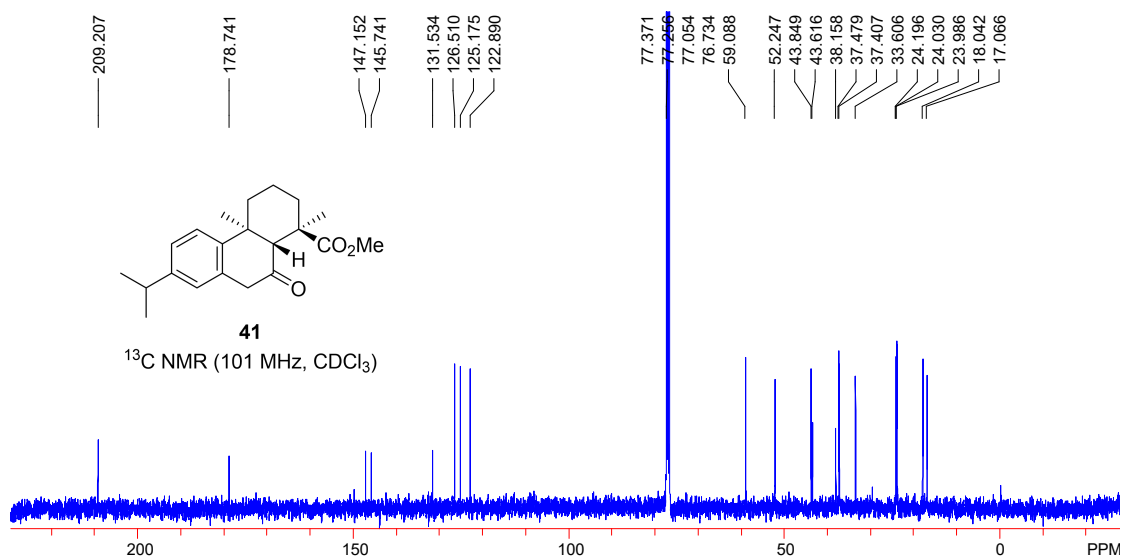

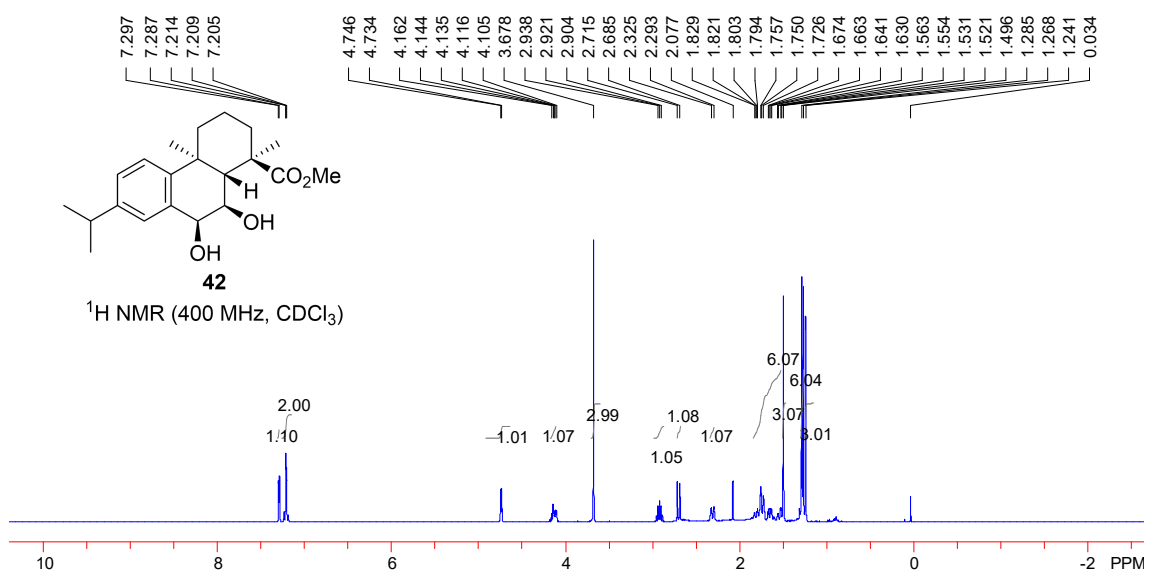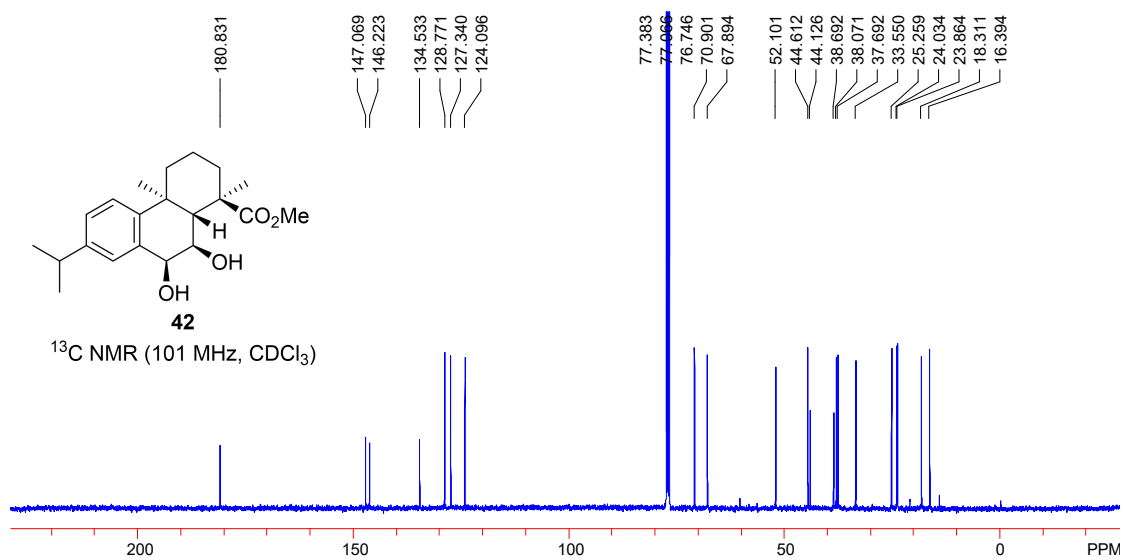

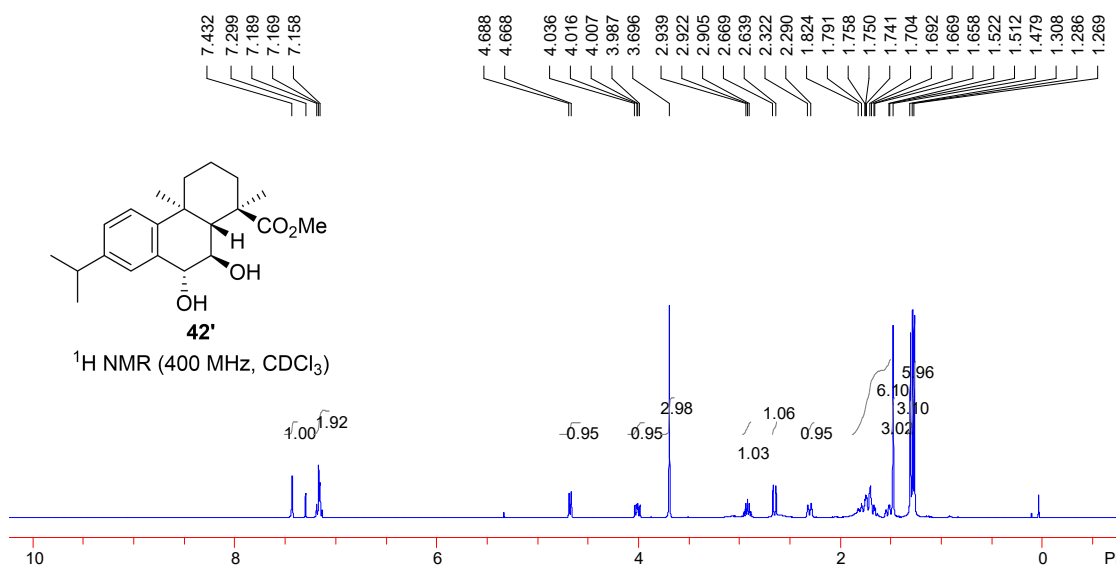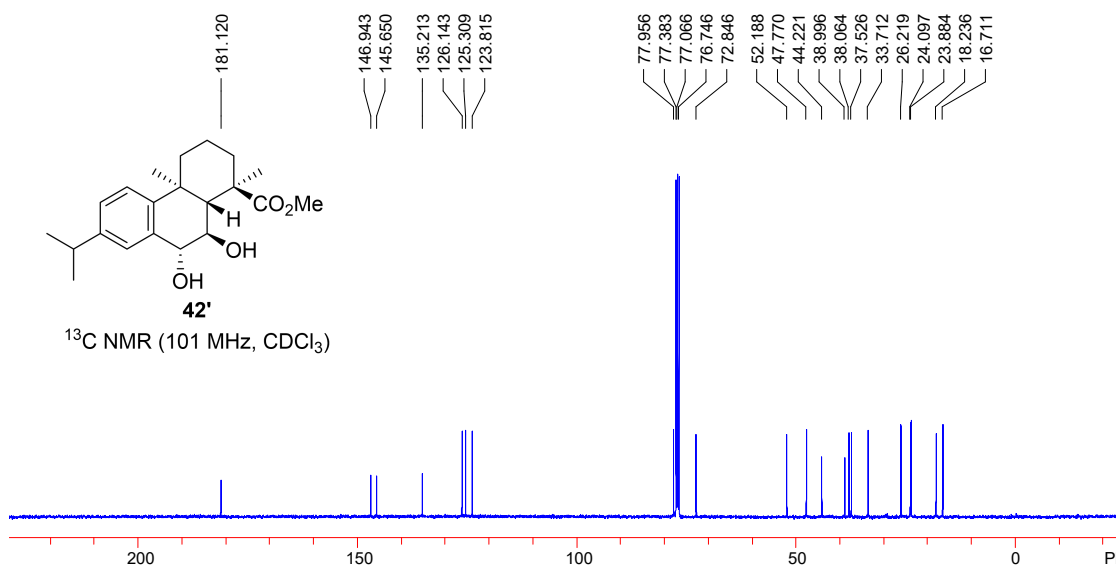

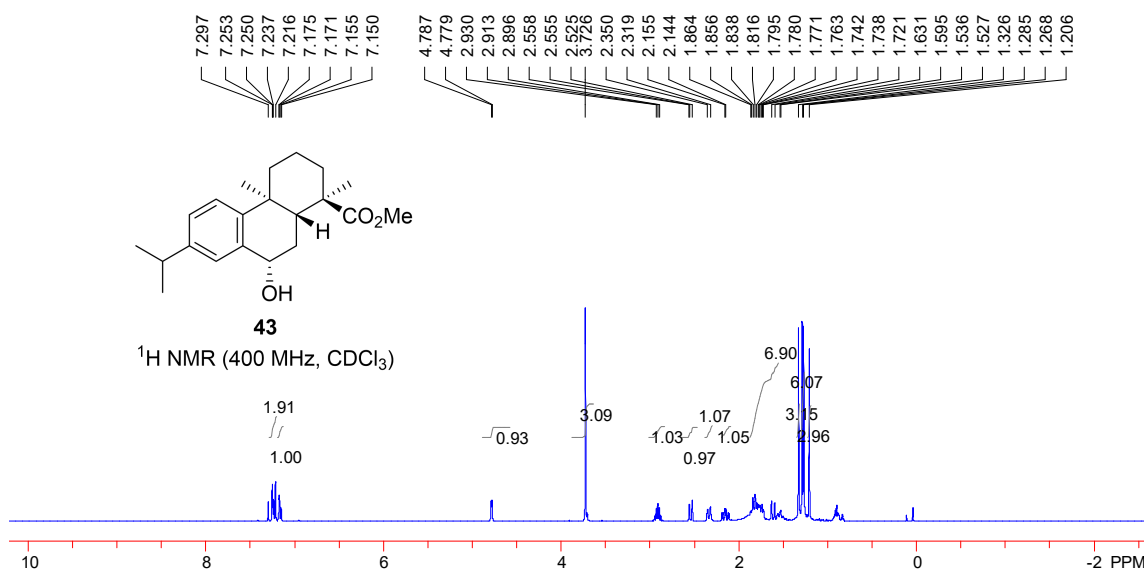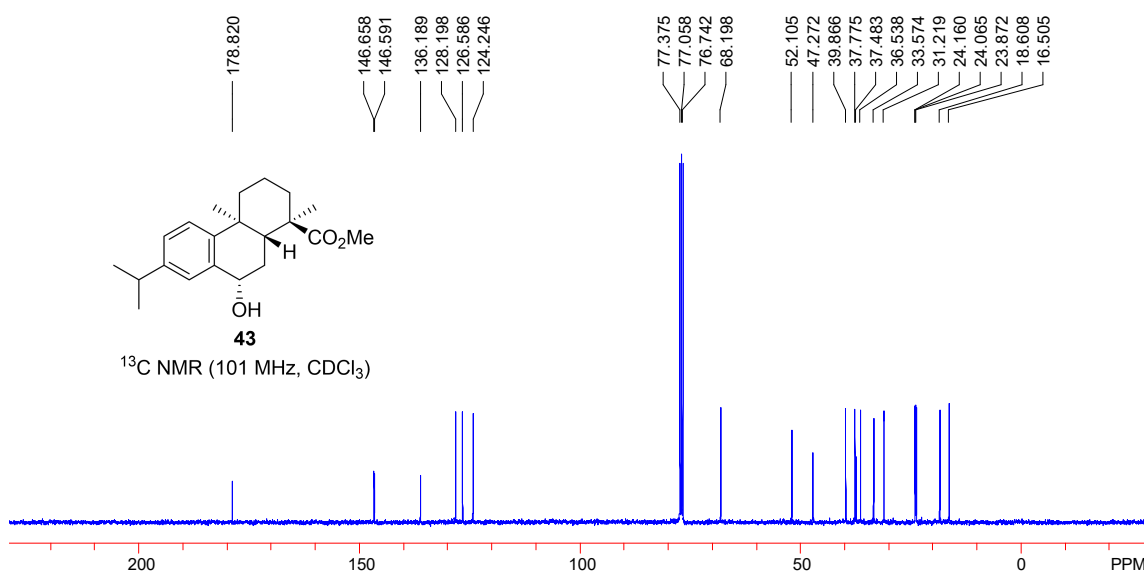

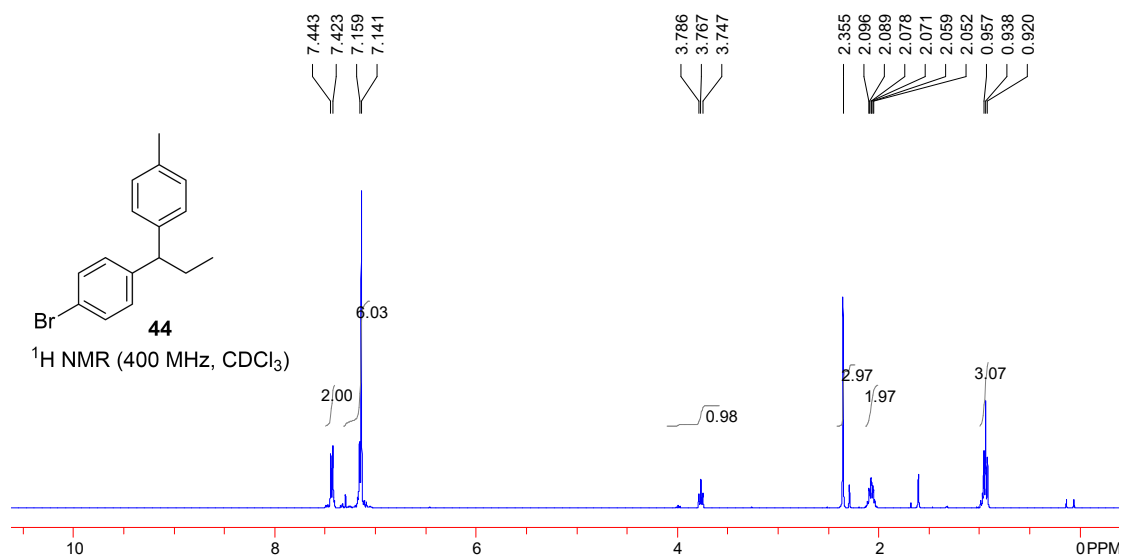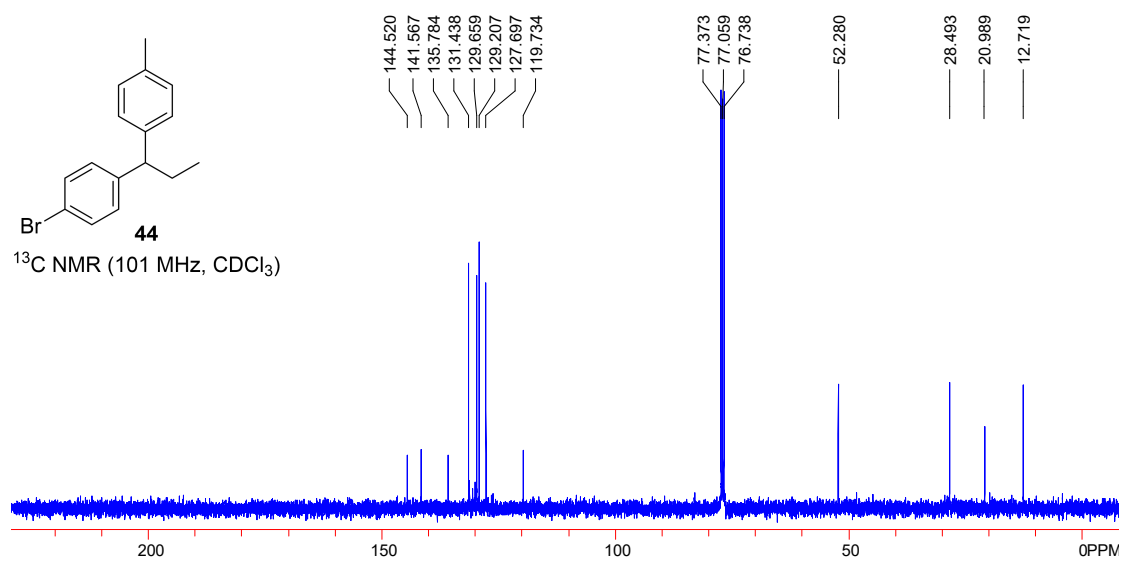

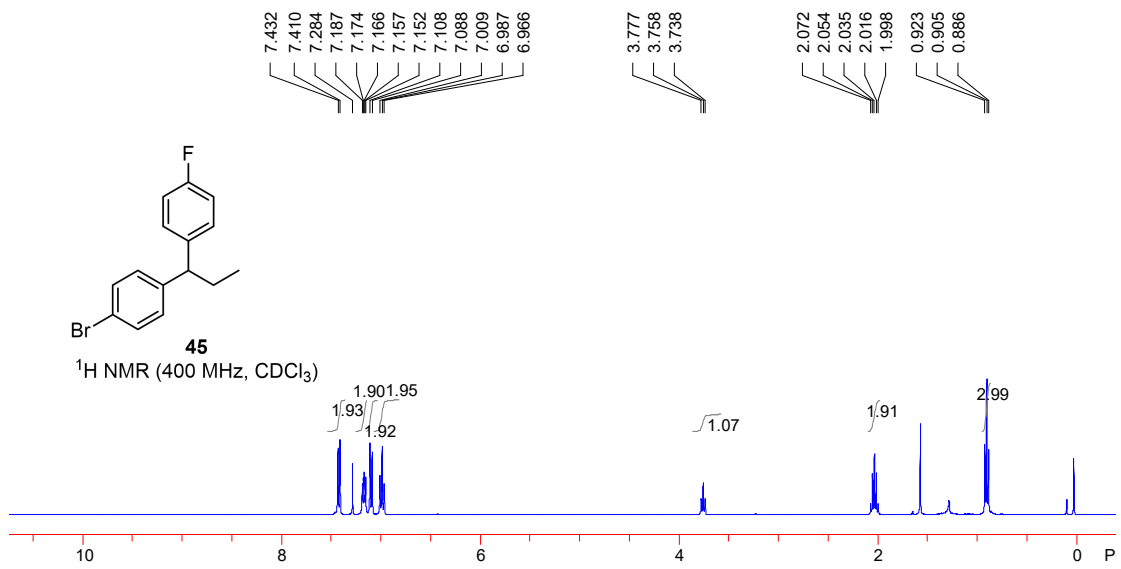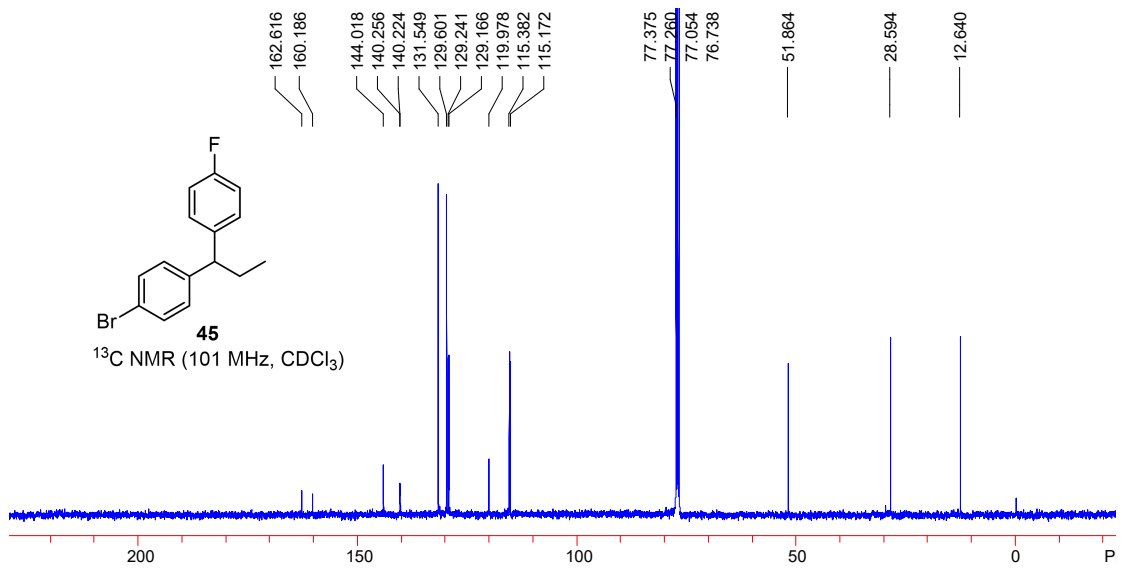

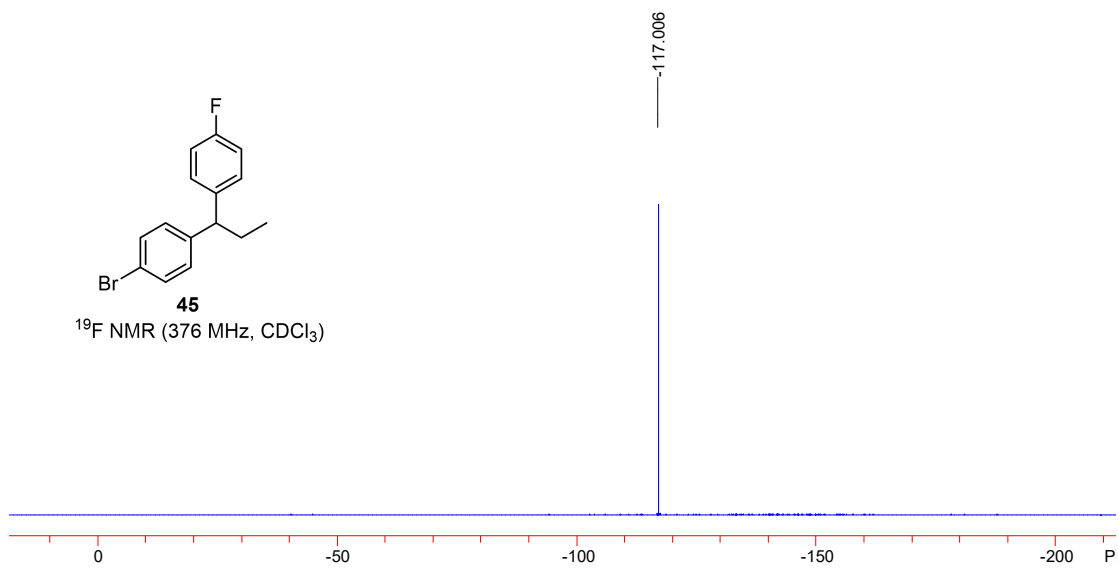



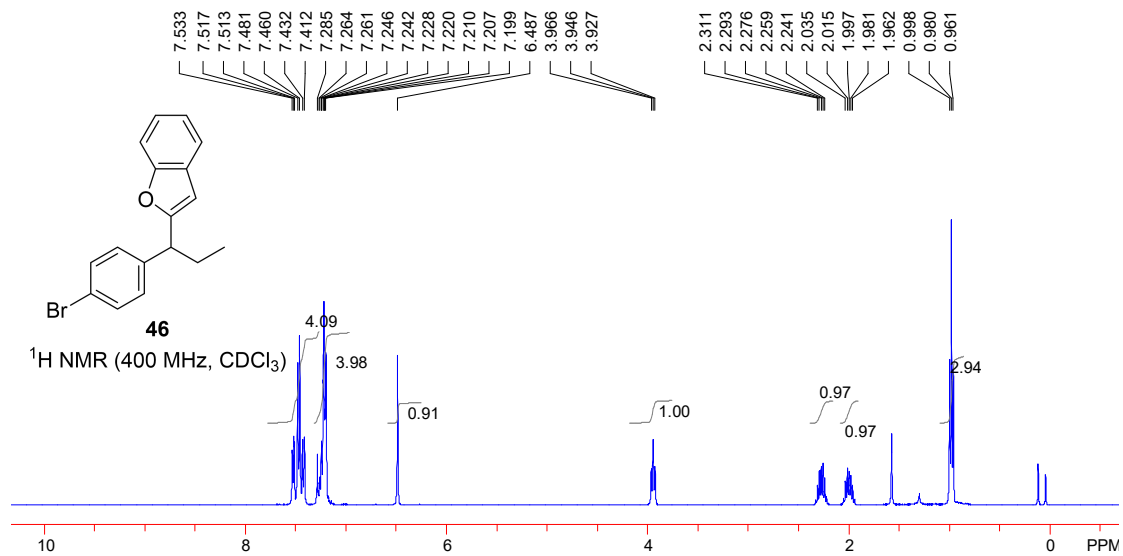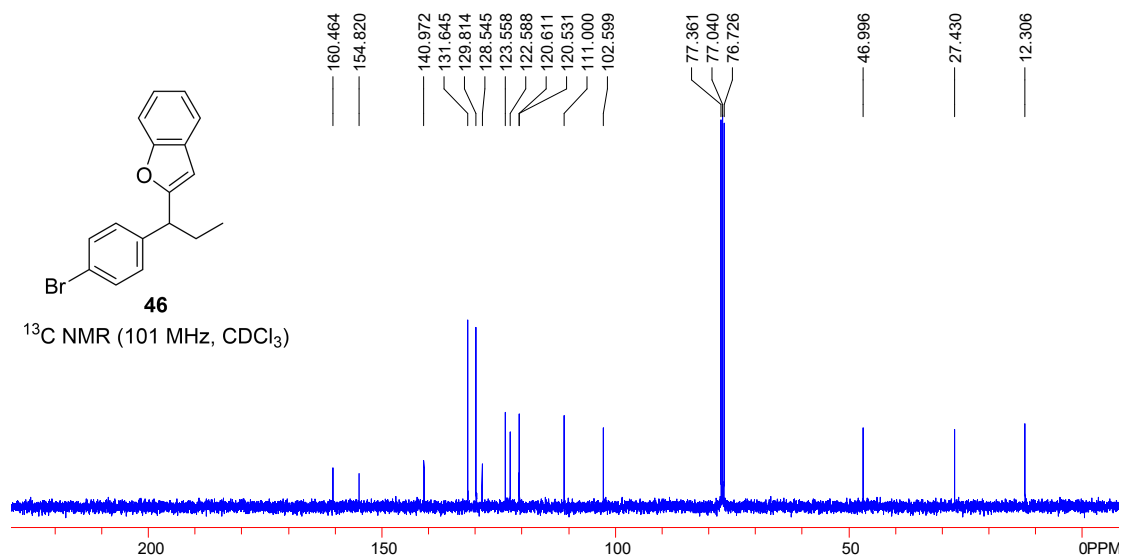

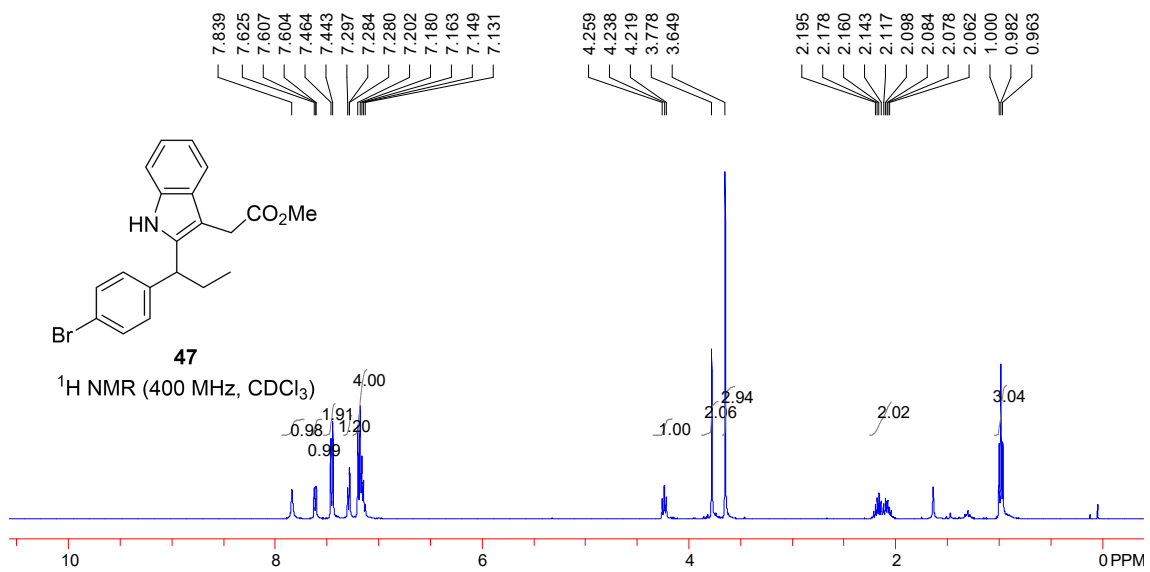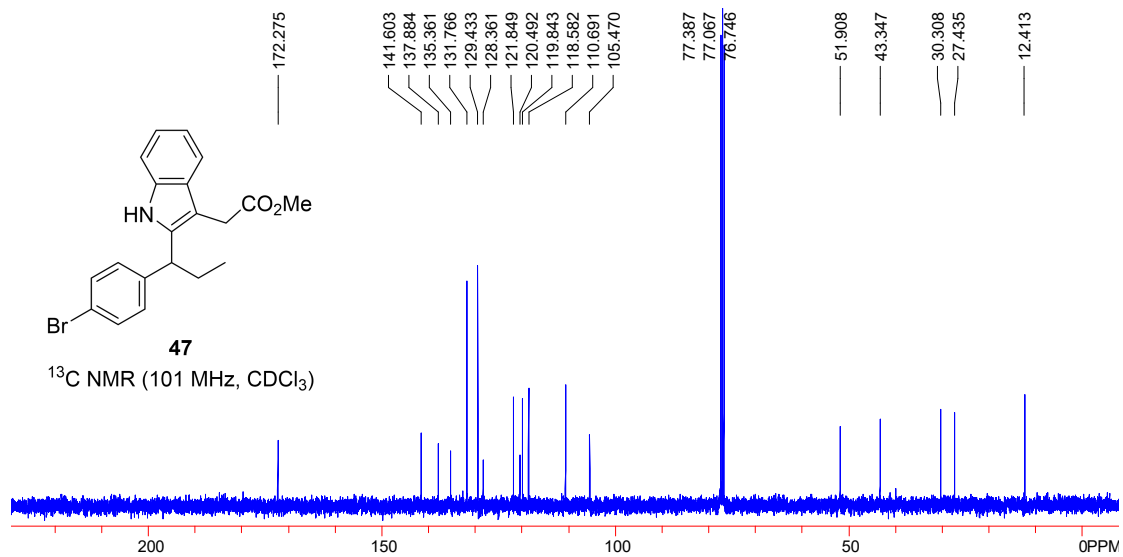

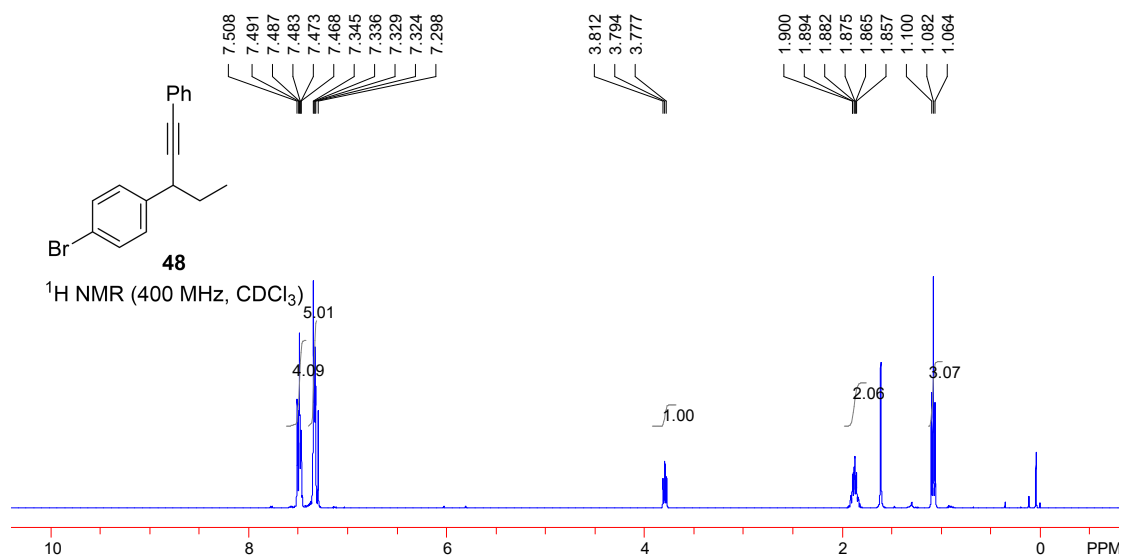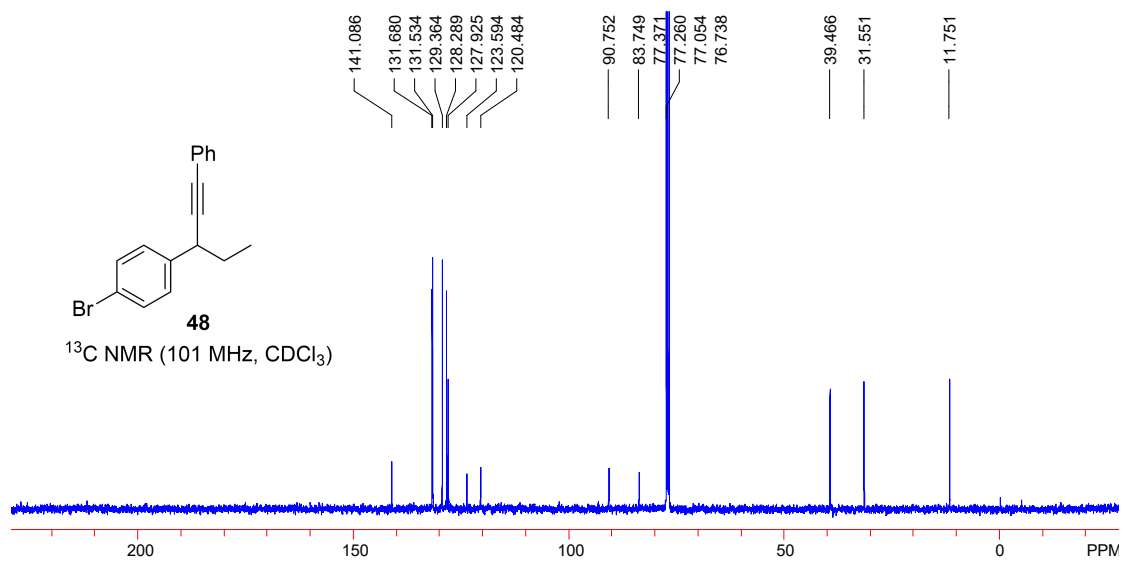

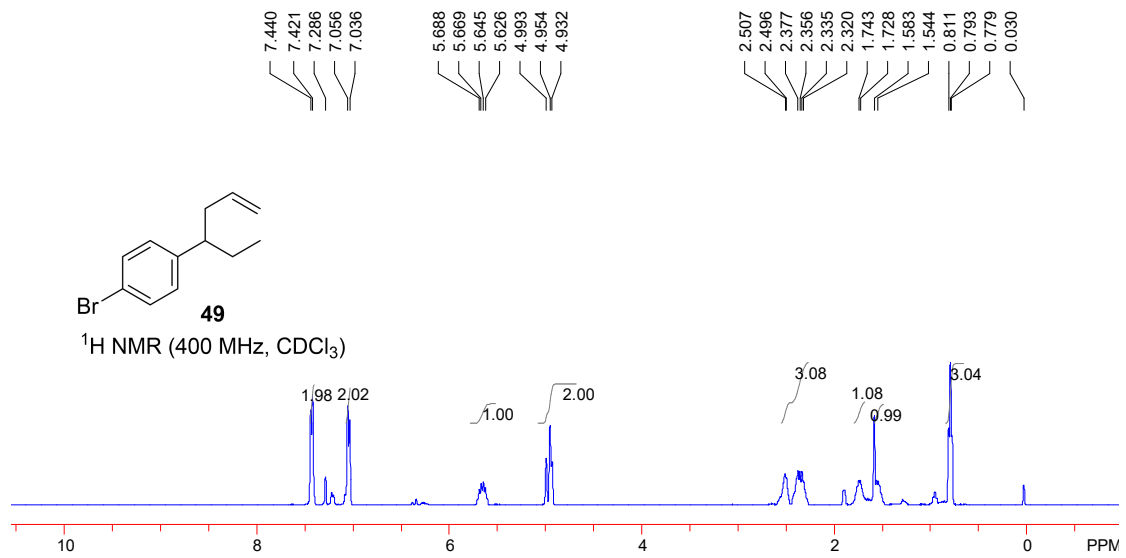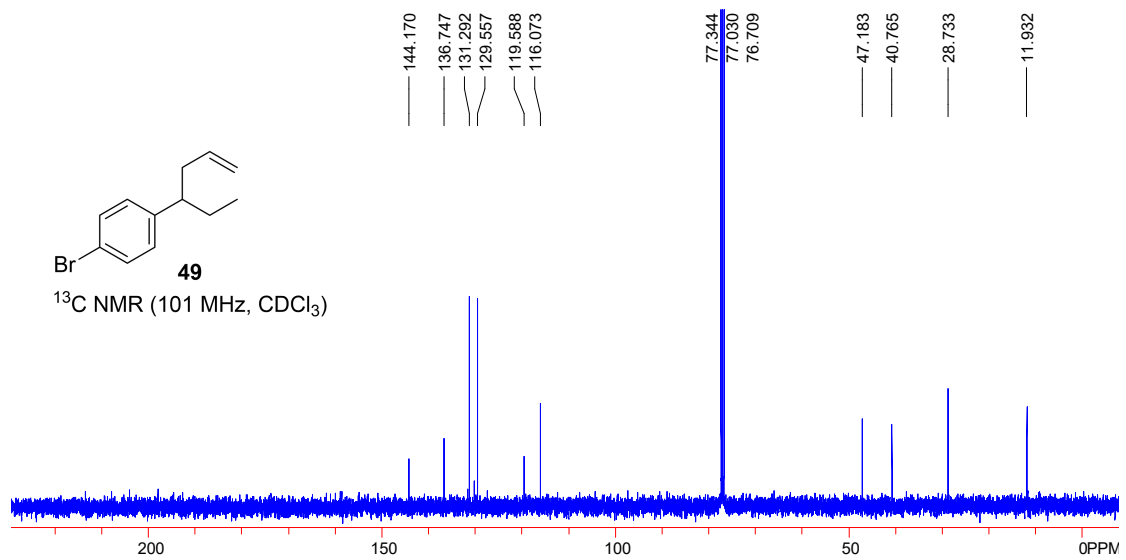

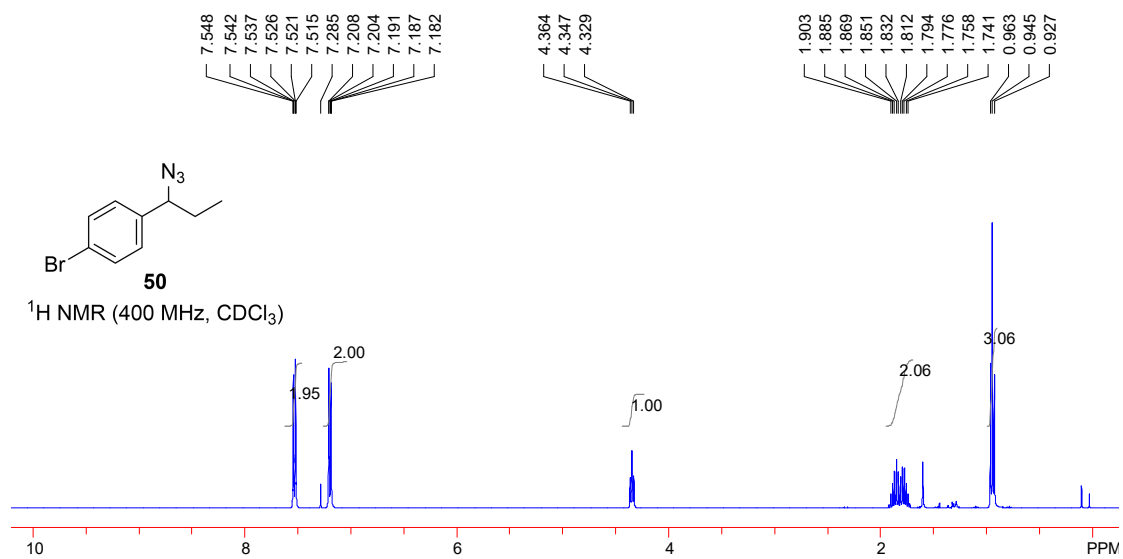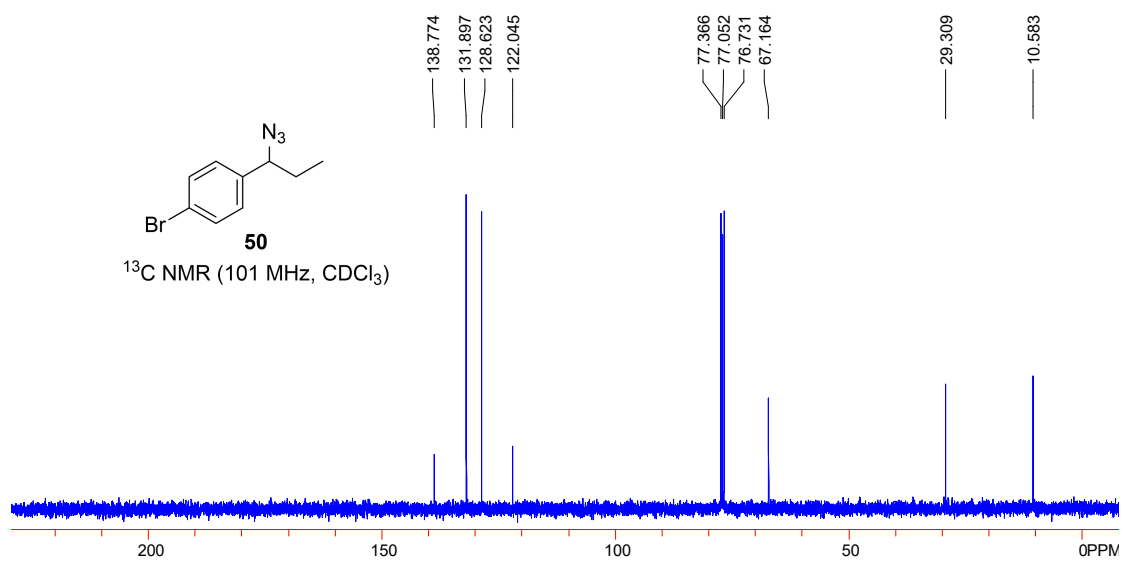

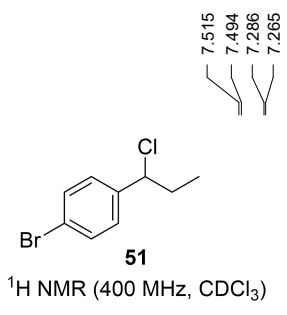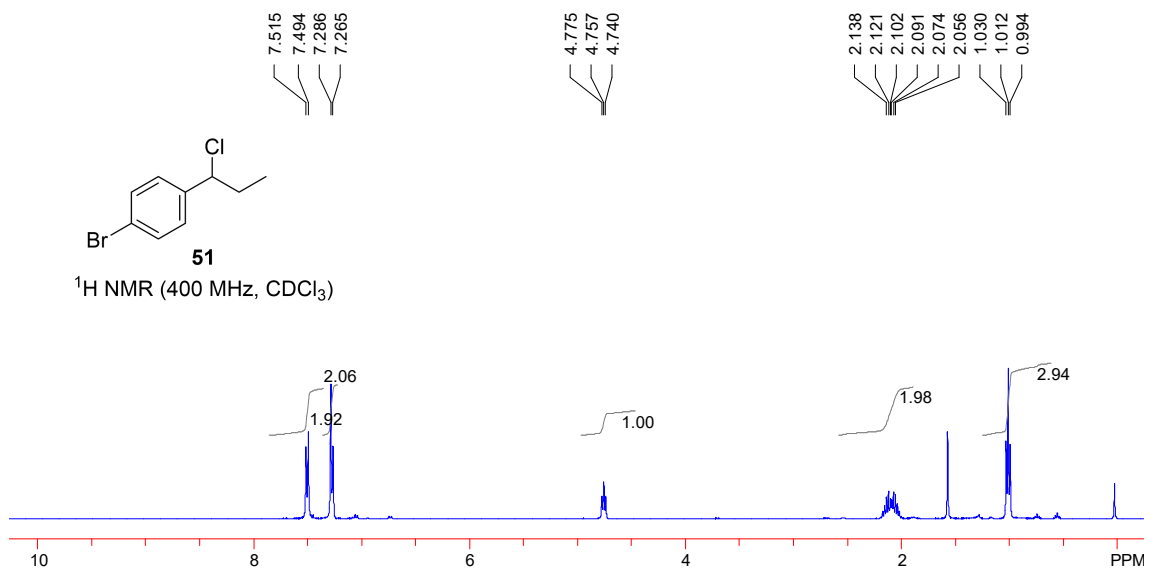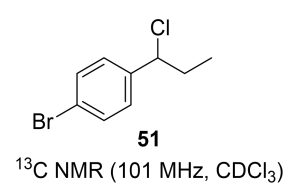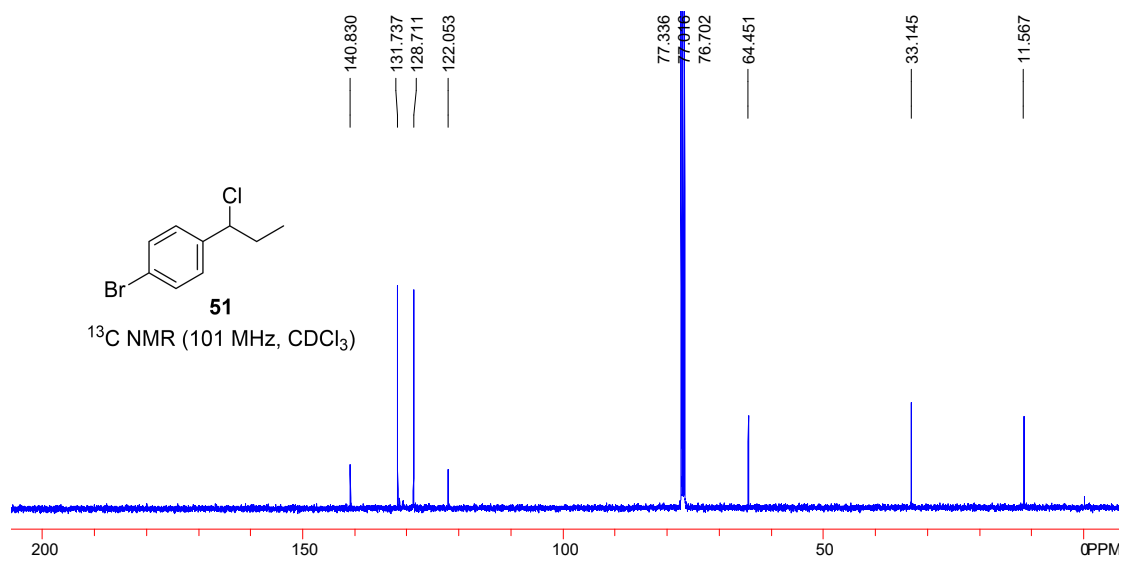

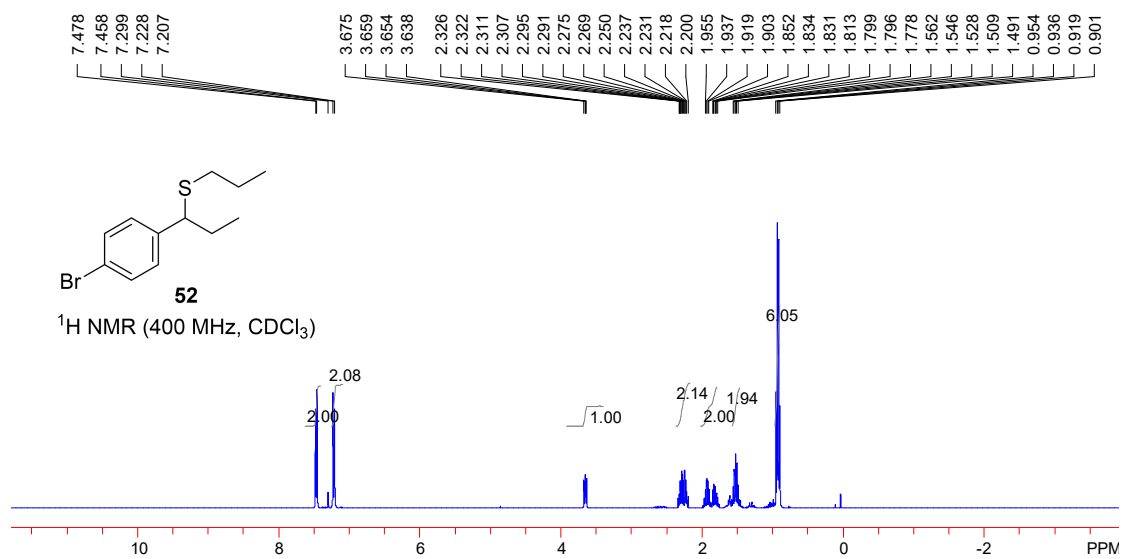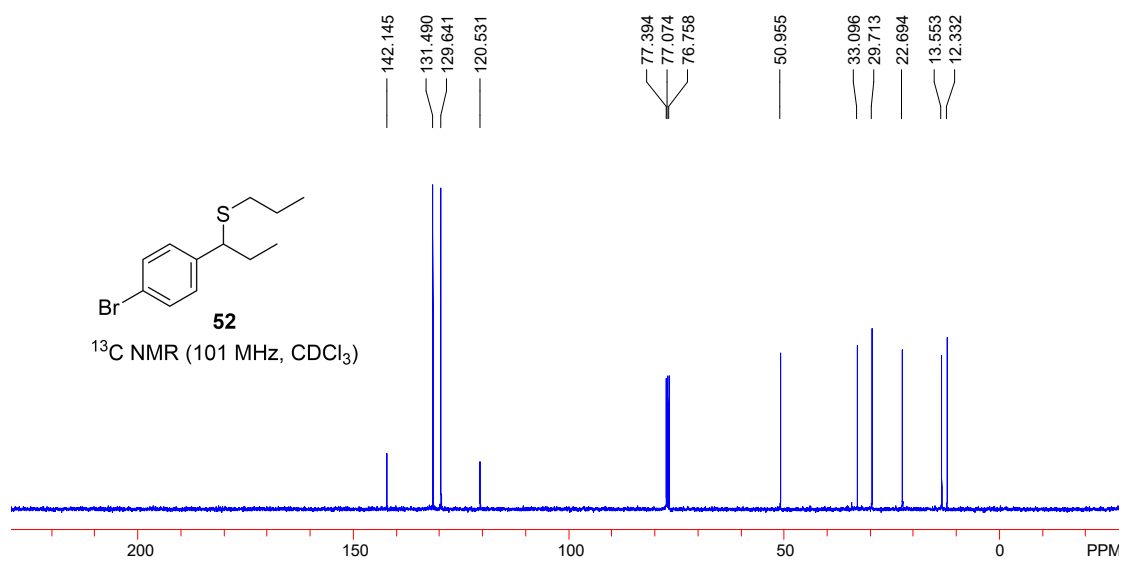

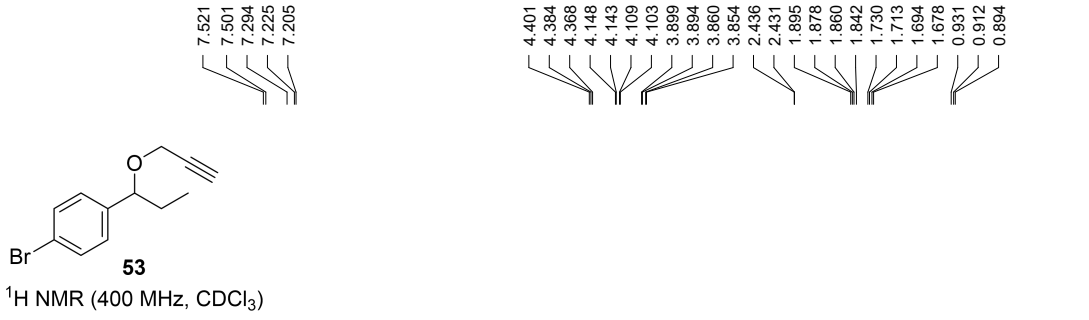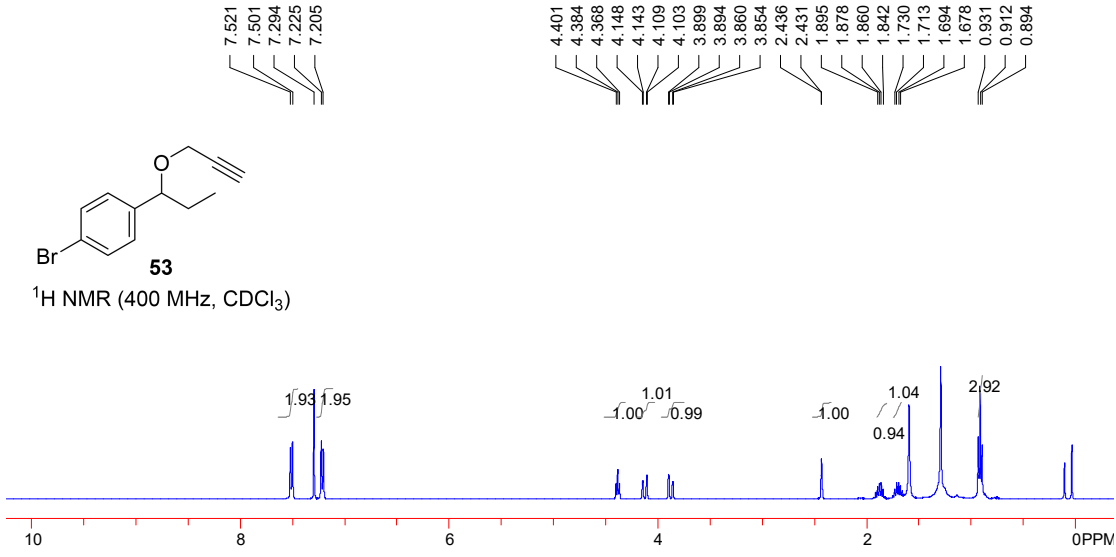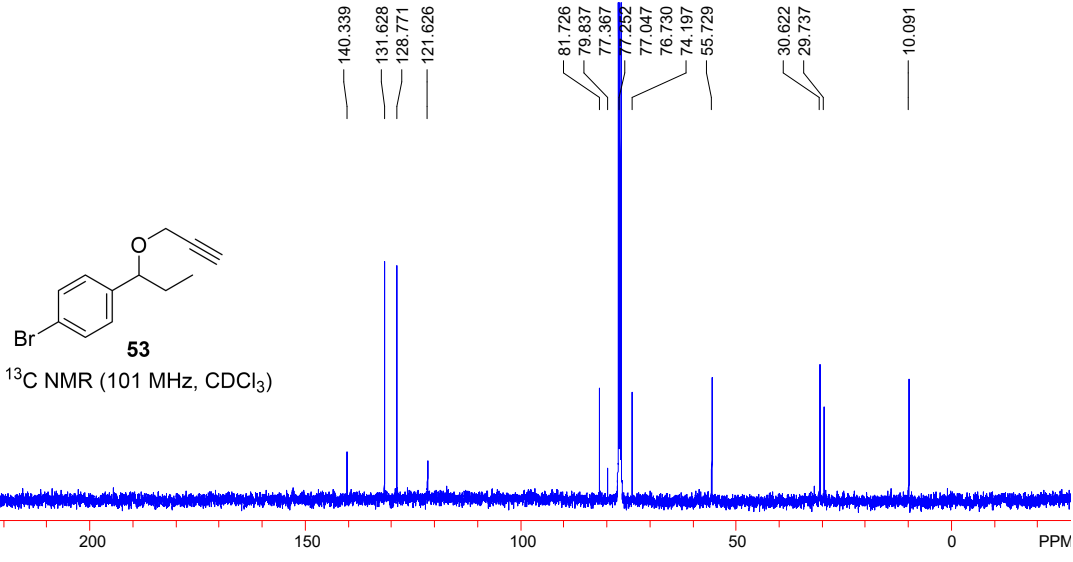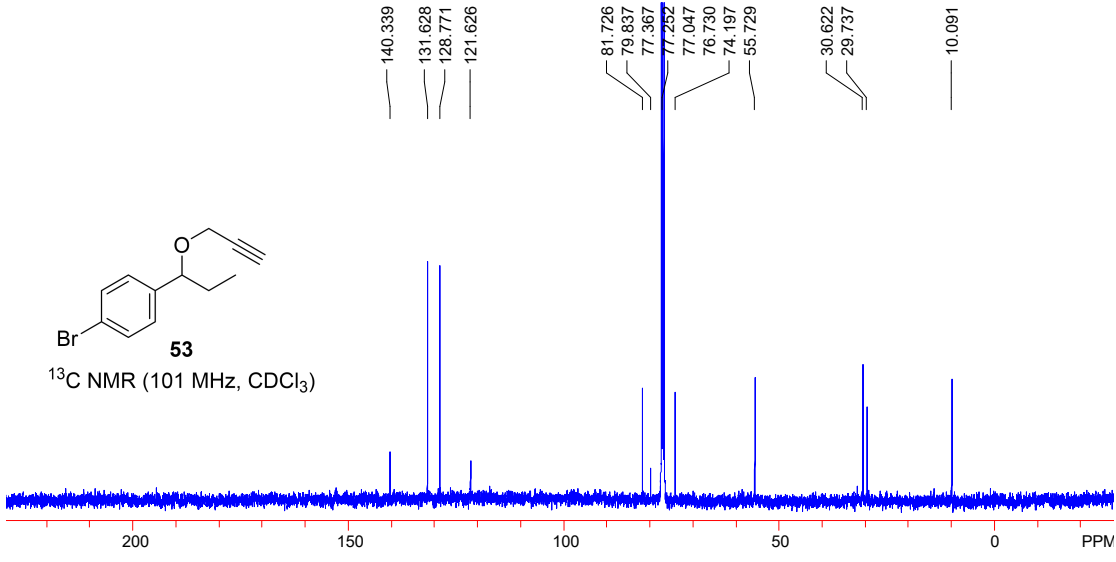



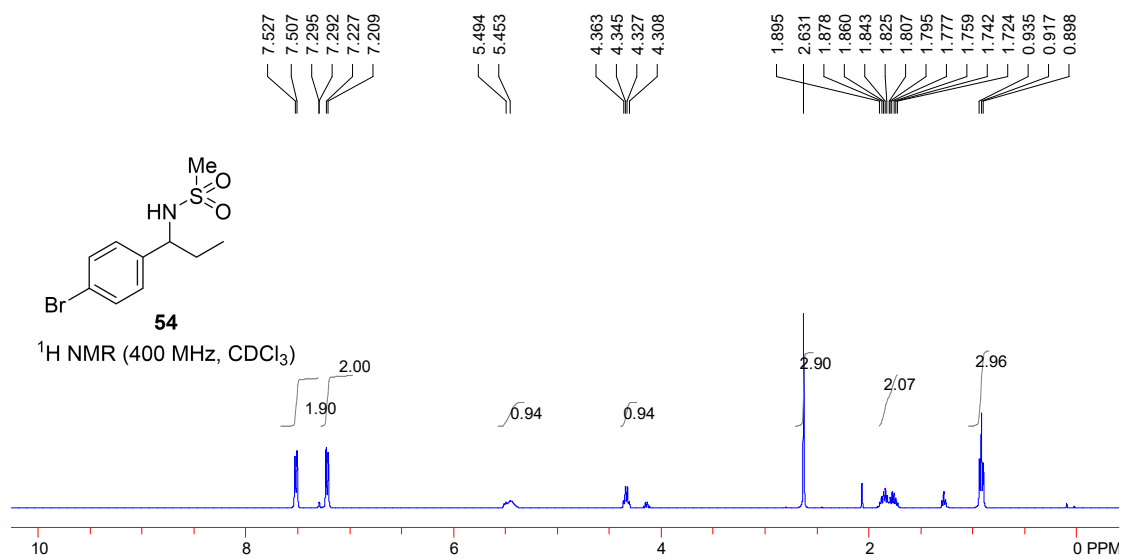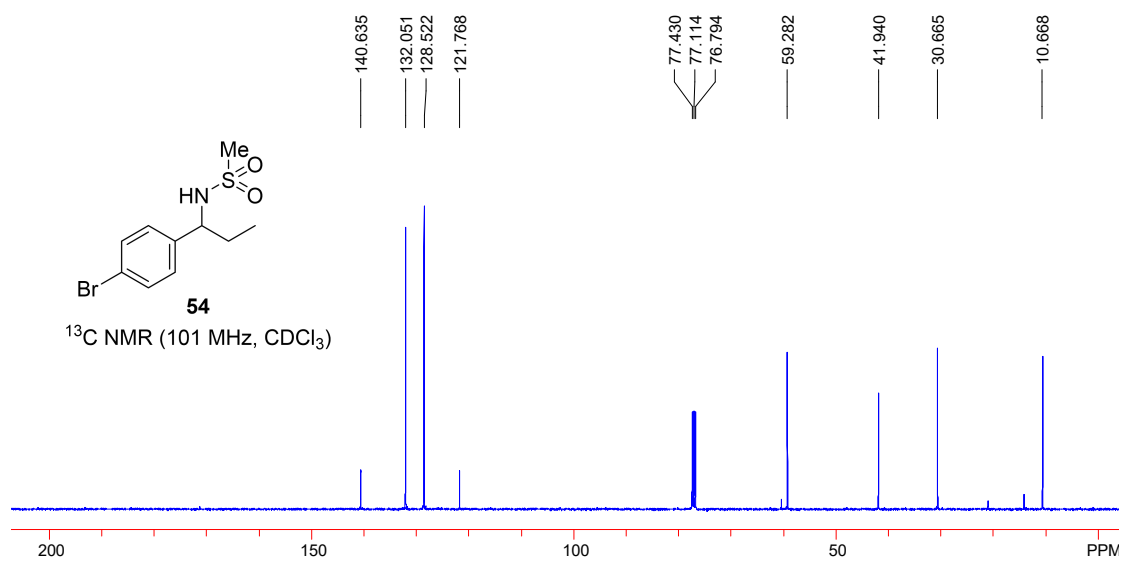

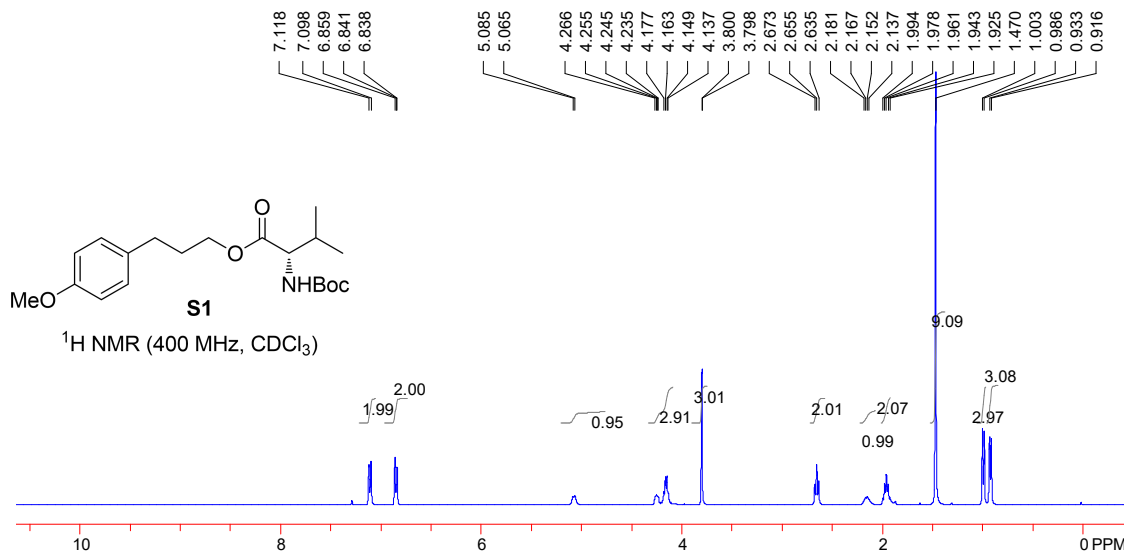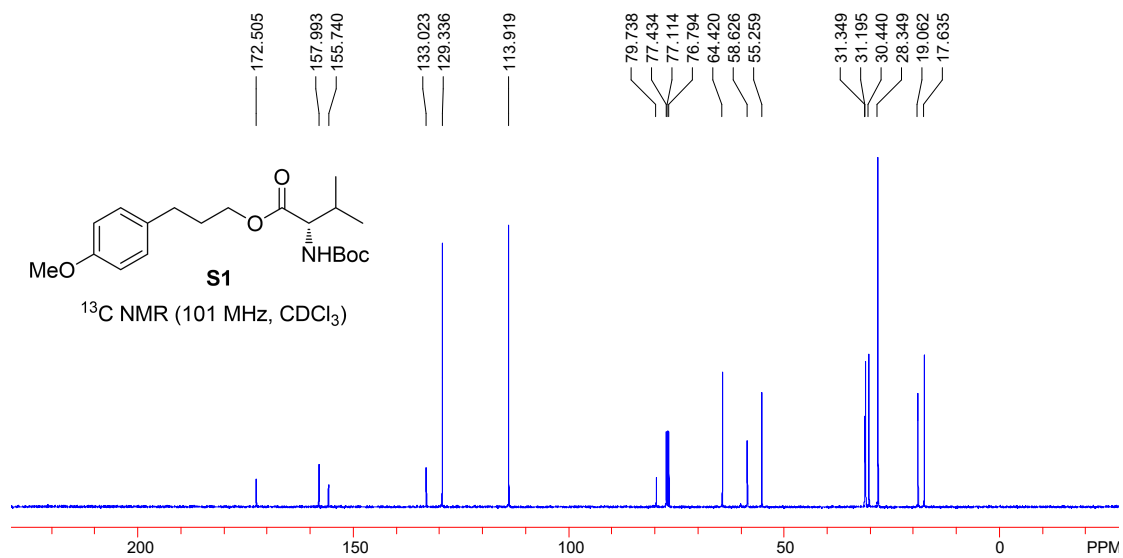

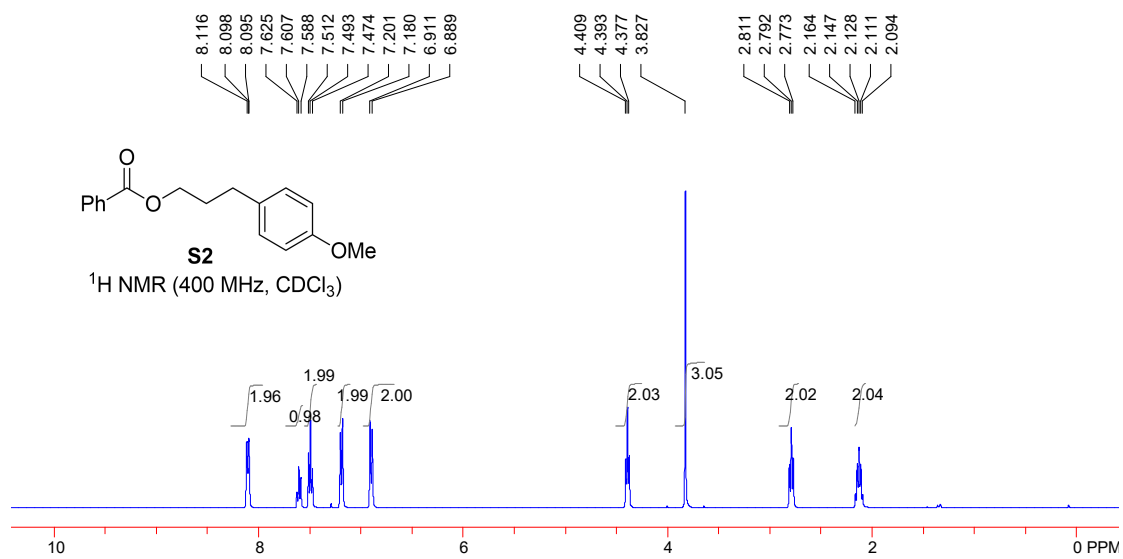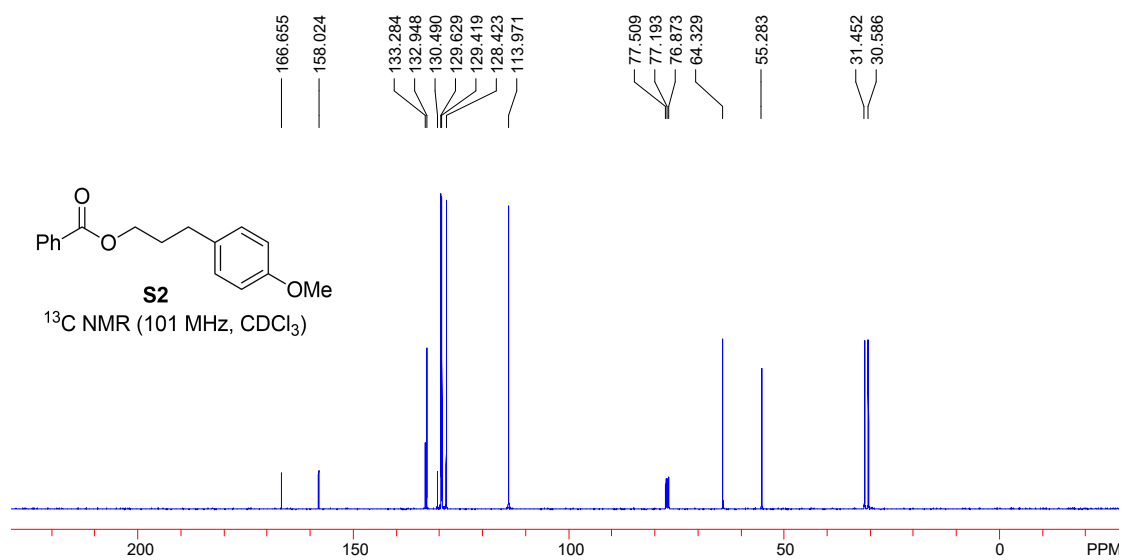

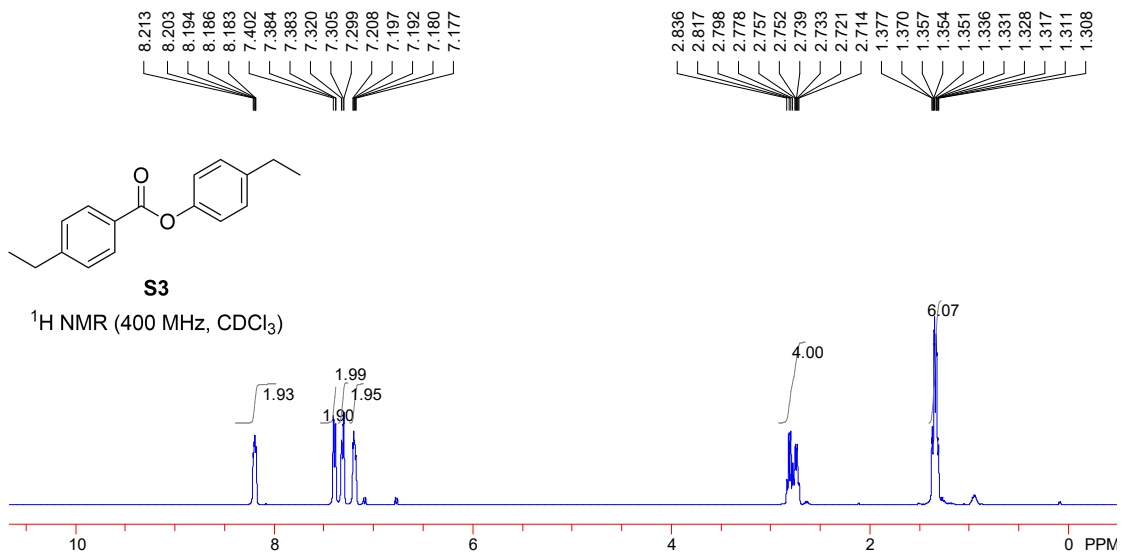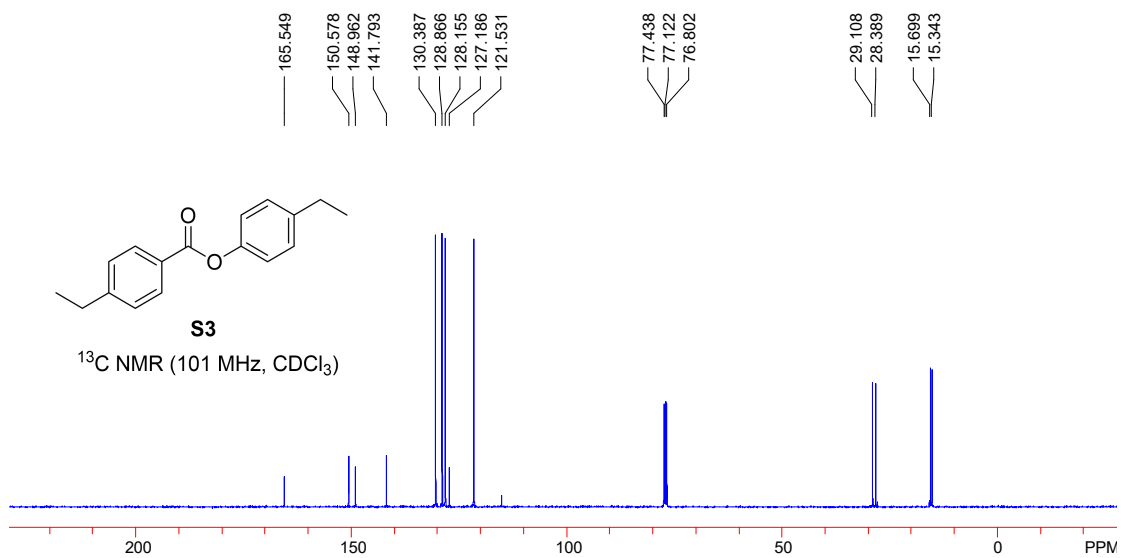

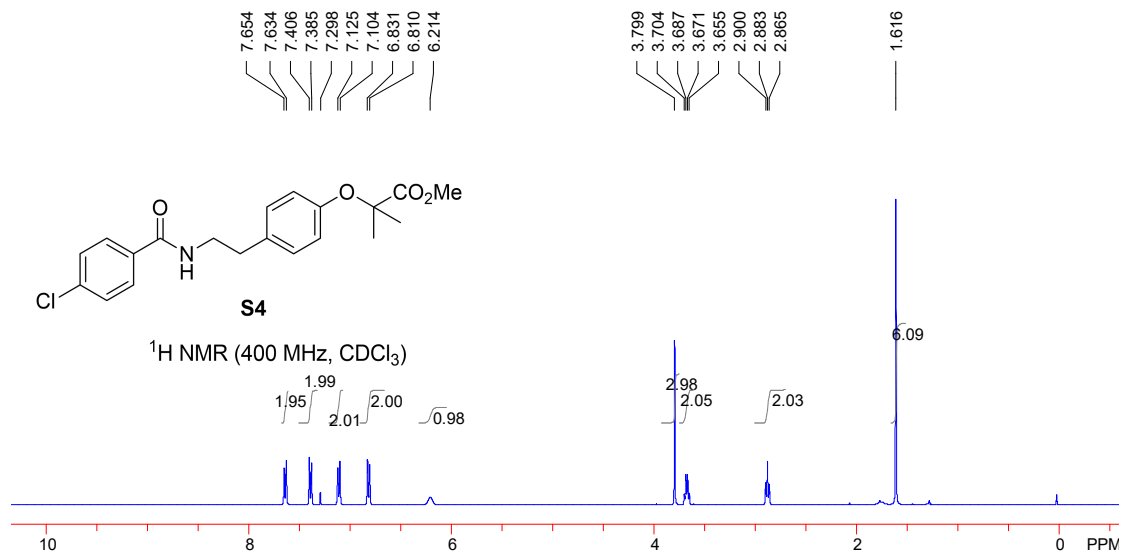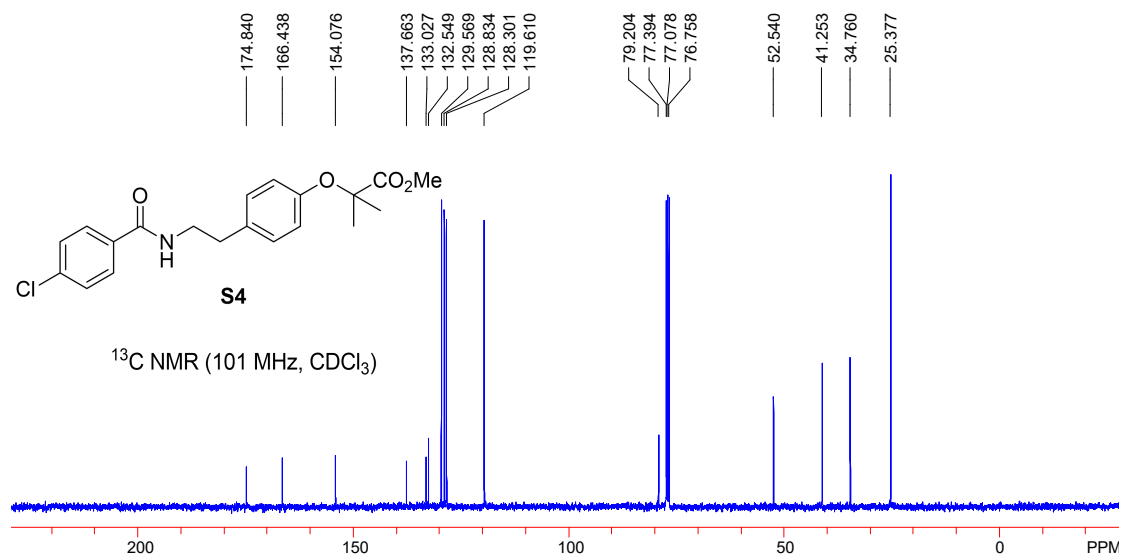

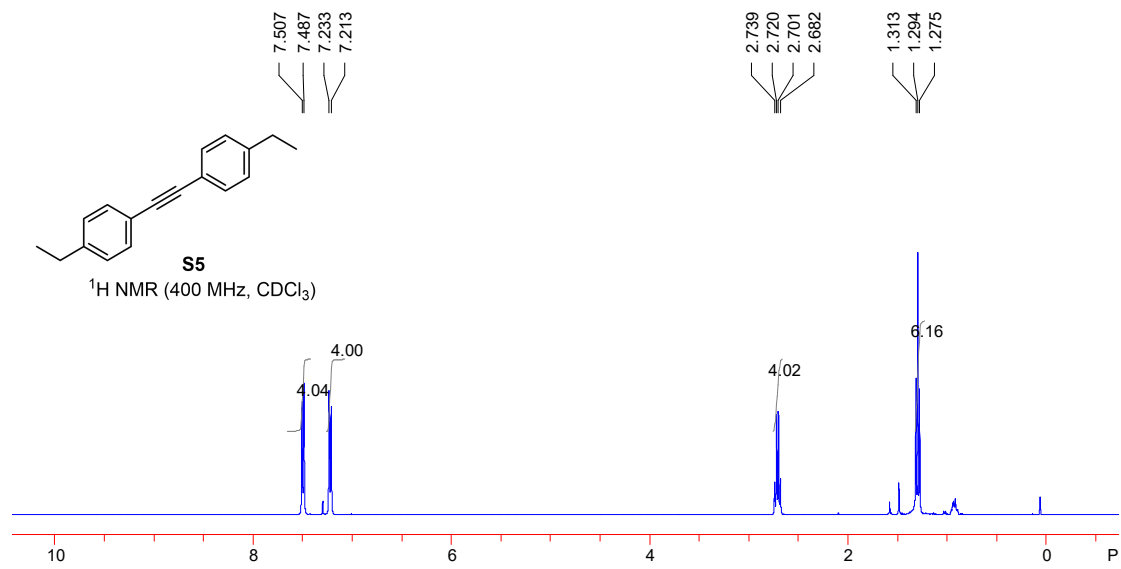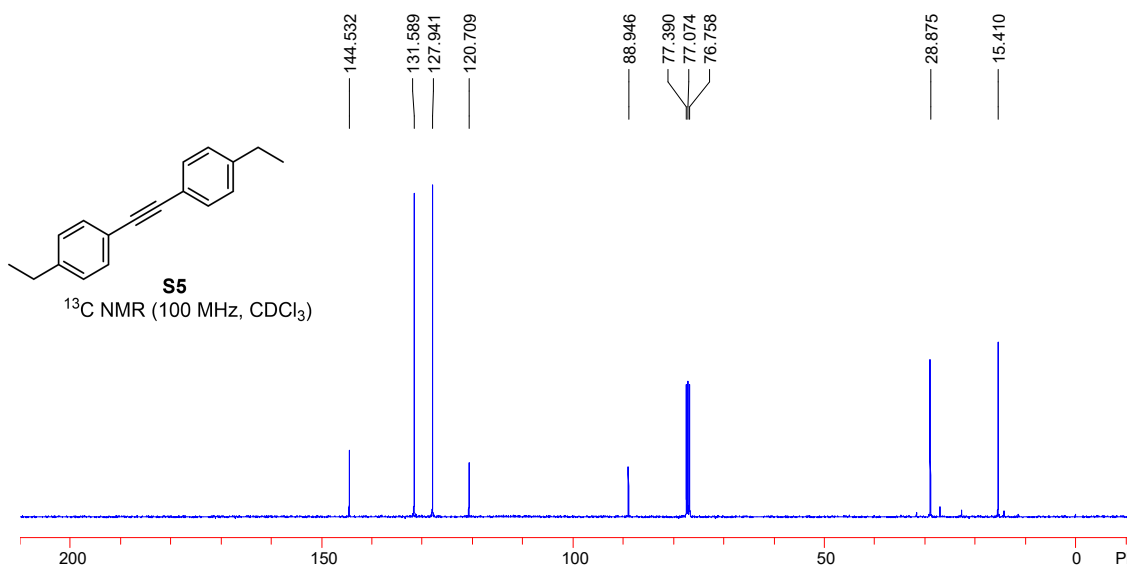

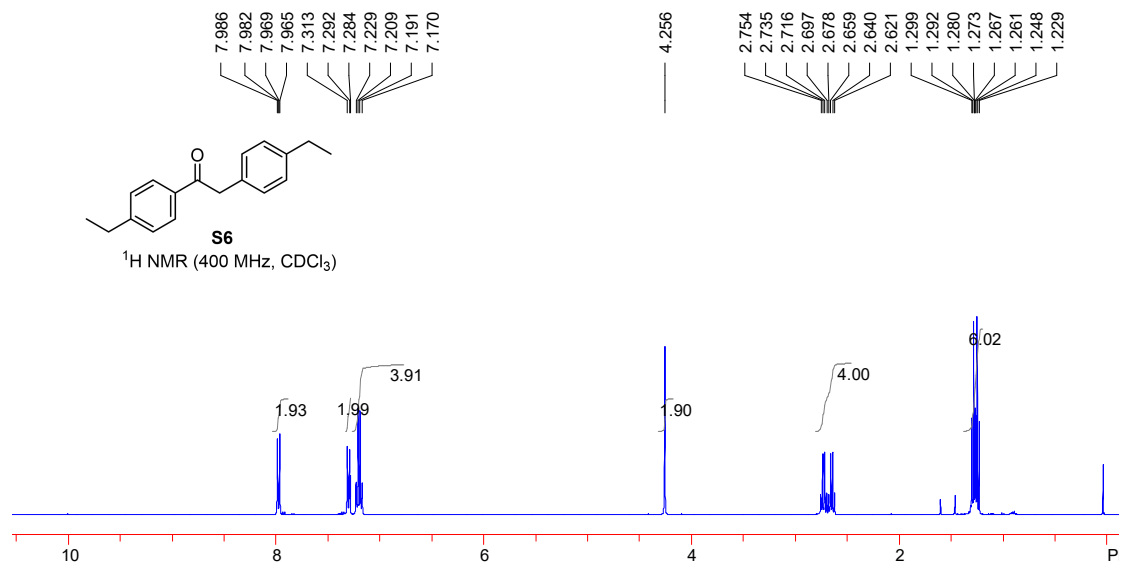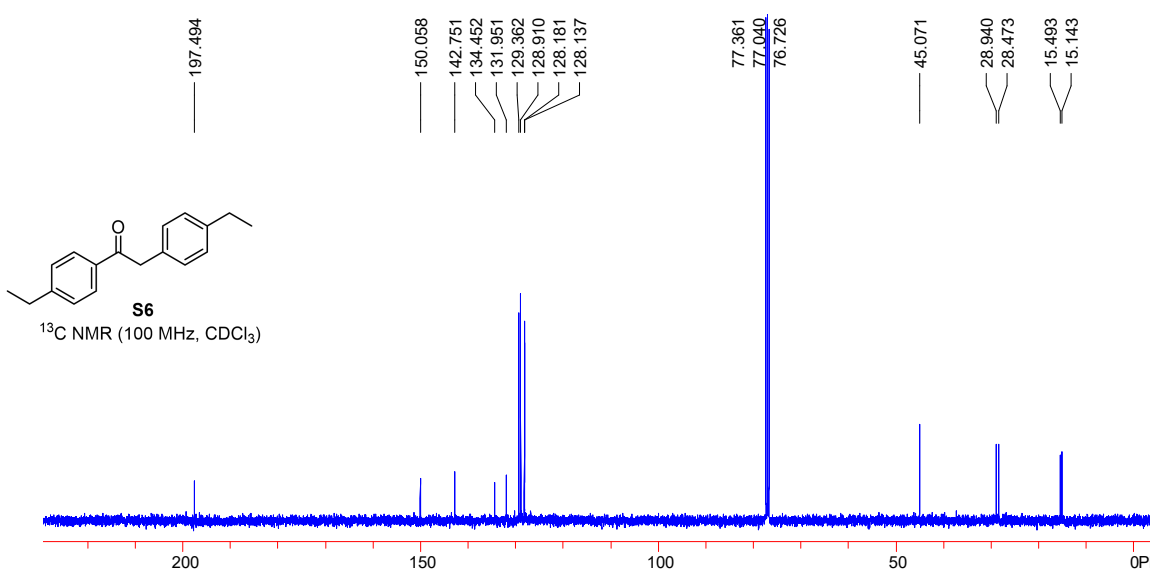

## 12. X-ray Crystal Structures and Data of **42** and **42'**

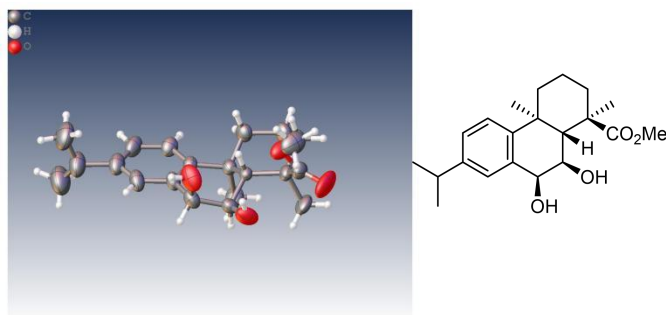

X-ray structure of **42** with 50% ellipsoid probability

CCDC 2325618

**X-ray structure determination.** Single crystals suitable for X-ray diffraction was obtained by slow evaporation of the solvent from a CH<sub>3</sub>OH solution of **42**. Crystal data collection and refinement parameters of **42** are summarized in Table S4. Intensity data were collected at 293 K on a SuperNova Dual diffractometer using mirror-monochromated Cu K $\alpha$  radiation,  $\lambda = 1.54184$  Å. The data were corrected for decay, Lorentz, and polarization effects as well as absorption and beam corrections based on the multi-scan technique. The structure was solved by a combination of direct methods in SHELXTL and the difference Fourier technique, and refined by full-matrix least-squares procedures. Nonhydrogen atoms were refined with anisotropic displacement parameters. The H-atoms were either located or calculated and subsequently treated with a riding model.

**Table S4** Crystallographic data and structure refinement results of **42**

|                   |                                                |
|-------------------|------------------------------------------------|
| Empirical formula | C <sub>21</sub> H <sub>29</sub> O <sub>4</sub> |
| Formula weight    | 345.44                                         |
| Temperature/K     | 293(2)                                         |
| Crystal system    | orthorhombic                                   |
| Space group       | P2 <sub>1</sub> 2 <sub>1</sub> 2 <sub>1</sub>  |
| a/Å               | 6.09540(10)                                    |
| b/Å               | 12.03060(10)                                   |
| c/Å               | 26.9927(3)                                     |
| $\alpha$ /°       | 90                                             |
| $\beta$ /°        | 90                                             |
| $\gamma$ /°       | 90                                             |



|                                             |                                                               |
|---------------------------------------------|---------------------------------------------------------------|
| Volume/Å <sup>3</sup>                       | 1979.41(4)                                                    |
| Z                                           | 4                                                             |
| ρ <sub>calc</sub> /cm <sup>3</sup>          | 1.159                                                         |
| μ/mm <sup>-1</sup>                          | 0.631                                                         |
| F(000)                                      | 748.0                                                         |
| Crystal size/mm <sup>3</sup>                | 0.25 × 0.1 × 0.05                                             |
| Radiation                                   | Cu Kα (λ = 1.54184)                                           |
| 2θ range for data collection/°              | 8.046 to 142.926                                              |
| Index ranges                                | -5 ≤ h ≤ 7, -14 ≤ k ≤ 14, -33 ≤ l ≤ 33                        |
| Reflections collected                       | 26116                                                         |
| Independent reflections                     | 3832 [R <sub>int</sub> = 0.0268, R <sub>sigma</sub> = 0.0157] |
| Data/restraints/parameters                  | 3832/972/233                                                  |
| Goodness-of-fit on F <sup>2</sup>           | 1.063                                                         |
| Final R indexes [I ≥ 2σ (I)]                | R <sub>1</sub> = 0.0807, wR <sub>2</sub> = 0.2370             |
| Final R indexes [all data]                  | R <sub>1</sub> = 0.0833, wR <sub>2</sub> = 0.2405             |
| Largest diff. peak/hole / e Å <sup>-3</sup> | 0.70/-0.48                                                    |
| Flack parameter                             | -0.02(7)                                                      |

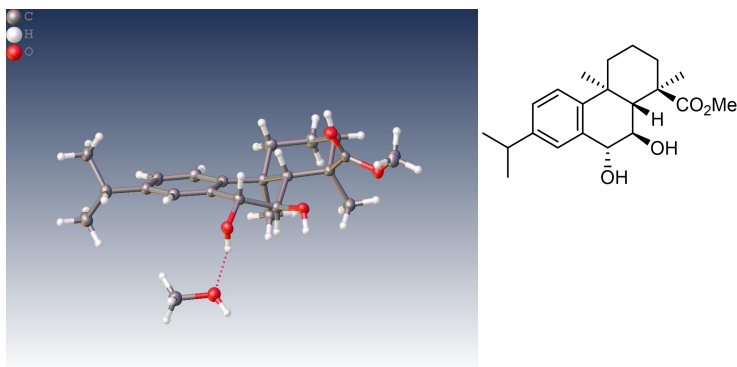

X-ray structure of **42'** with 50% ellipsoid probability

CCDC 2325639

**X-ray structure determination.** Single crystals suitable for X-ray diffraction was obtained by slow evaporation of the solvent from a CH<sub>3</sub>OH solution of **42'**. Crystal data collection and refinement parameters of **42'** are summarized in Table S5. Intensity data were collected at 100 K on a SuperNova Dualdiffractometer using mirror-monochromated Cu K $\alpha$  radiation,  $\lambda = 1.54178$  Å. The data were corrected for decay, Lorentz, and polarization effects as well as absorption and beam corrections based on the multi-scan technique. The structure was solved by a combination of direct methods in SHELXTL and the difference Fourier technique, and refined by full-matrix least-squares procedures. Nonhydrogen atoms were refined with anisotropic displacement parameters. The H-atoms were either located or calculated and subsequently treated with a riding model.

**Table S5** Crystallographic data and structure refinement results of **42'**

|                   |                                                |
|-------------------|------------------------------------------------|
| Empirical formula | C <sub>22</sub> H <sub>34</sub> O <sub>5</sub> |
| Formula weight    | 378.49                                         |
| Temperature/K     | 100.01(10)                                     |
| Crystal system    | monoclinic                                     |
| Space group       | P2 <sub>1</sub>                                |
| a/Å               | 13.6015(7)                                     |
| b/Å               | 6.0925(2)                                      |
| c/Å               | 13.7972(7)                                     |
| $\alpha$ /°       | 90                                             |
| $\beta$ /°        | 116.481(7)                                     |
| $\gamma$ /°       | 90                                             |

|                                             |                                                               |
|---------------------------------------------|---------------------------------------------------------------|
| Volume/Å <sup>3</sup>                       | 1023.38(10)                                                   |
| Z                                           | 2                                                             |
| ρ <sub>calc</sub> /cm <sup>3</sup>          | 1.228                                                         |
| μ/mm <sup>-1</sup>                          | 0.688                                                         |
| F(000)                                      | 412.0                                                         |
| Crystal size/mm <sup>3</sup>                | 0.13 × 0.13 × 0.06                                            |
| Radiation                                   | Cu Kα (λ = 1.54178)                                           |
| 2θ range for data collection/°              | 7.158 to 154.14                                               |
| Index ranges                                | -16 ≤ h ≤ 16, -7 ≤ k ≤ 6, -16 ≤ l ≤ 17                        |
| Reflections collected                       | 9110                                                          |
| Independent reflections                     | 3636 [R <sub>int</sub> = 0.0371, R <sub>sigma</sub> = 0.0404] |
| Data/restraints/parameters                  | 3636/1/256                                                    |
| Goodness-of-fit on F <sup>2</sup>           | 1.074                                                         |
| Final R indexes [I ≥ 2σ (I)]                | R <sub>1</sub> = 0.0376, wR <sub>2</sub> = 0.1024             |
| Final R indexes [all data]                  | R <sub>1</sub> = 0.0393, wR <sub>2</sub> = 0.1037             |
| Largest diff. peak/hole / e Å <sup>-3</sup> | 0.26/-0.20                                                    |
| Flack parameter                             | -0.01(13)                                                     |
